1 **Title**

2 Circuit Degeneracy Facilitates Robustness and Flexibility of Navigation Behavior in *C.*  
3 *elegans*

4

5 **Author names and affiliations**

6 Muneki Ikeda<sup>1</sup>, Shunji Nakano<sup>1,2</sup>, Andrew C. Giles<sup>1,3</sup>, Wagner Steuer Costa<sup>4,5</sup>,  
7 Alexander Gottschalk<sup>4,5</sup>, and Ikue Mori<sup>1,2\*</sup>

8 <sup>1</sup>Group of Molecular Neurobiology, Division of Biological Science, Graduate School of  
9 Science, Nagoya University, Nagoya 464-8602, Japan

10 <sup>2</sup>Neuroscience Institute, Graduate School of Science, Nagoya University, Nagoya  
11 464-8602, Japan

12 <sup>3</sup>Department of Neuroscience, The Scripps Research Institute, Scripps Florida, Jupiter,  
13 Florida 33458, USA

14 <sup>4</sup>Buchmann Institute for Molecular Life Sciences, Goethe University,  
15 Max-von-Laue-Strasse 15, 60438 Frankfurt, Germany

16 <sup>5</sup>Department of Biochemistry, Chemistry and Pharmacy, Institute for Biophysical  
17 Chemistry, Goethe University, Max-von-Laue-Strasse 9, 60438 Frankfurt, Germany

18 \*For correspondence: m46920a@nucc.cc.nagoya-u.ac.jp (IM)

19

20 **Abstract**

21 Animal behaviors are robust and flexible. To elucidate how these two conflicting  
22 features of behavior are encoded in the nervous system, we analyzed the neural circuits  
23 generating a *C. elegans* thermotaxis behavior, in which animals migrate toward the past  
24 cultivation temperature ( $T_c$ ). We identified multiple circuits that are highly overlapping  
25 but individually regulate distinct behavioral components to achieve thermotaxis. When  
26 the regulation of a behavioral component is disrupted following single cell ablations, the  
27 other components compensate the deficit, enabling the animals to robustly migrate  
28 toward the  $T_c$ . Depending on whether the environmental temperature surrounding the  
29 animals is above or below the  $T_c$ , different circuits regulate the same behavioral  
30 components, mediating the flexible switch between migration up or down toward the  $T_c$ .  
31 These context-dependencies within the overlapping sub-circuits reveal the  
32 implementation of degeneracy in the nervous system, providing a circuit-level basis for  
33 the robustness and flexibility of behavior.

34

## 35 **Introduction**

36 Animal behaviors exhibit two conflicting features, robustness and flexibility. Animals  
37 robustly execute behavior despite external and internal perturbations (Macmillan, 2000;  
38 Maddox, 1994; Meyer et al., 1998), but flexibly behave within a variable environment  
39 owing to the adaptation to external and internal changes (Honma et al., 2003; Okamoto  
40 and Aizawa, 2013; Saper et al., 2002). These two features lead animals to better chance  
41 of survival and reproduction, and also provide animals with higher evolvability  
42 (Edelman and Gally, 2001; Whitacre and Bender, 2010). Reconciling robustness and  
43 flexibility is thus a fundamental aspect for every biological system (Heinl and Grabherr,  
44 2017; Kitano, 2004; Meir et al., 2002). However, it remains unclear how biological  
45 systems, especially the nervous system, can generate robust and flexible outputs.

46 With a compact nervous system consisting of only 302 neurons, the free-living  
47 nematode *Caenorhabditis elegans* exhibits navigation behaviors that are robust and  
48 flexible. Behaviors with such features are well exemplified by thermotaxis and  
49 chemotaxis. *C. elegans* animals can memorize environmental stimuli such as  
50 temperature or ion concentration in association with their feeding state (Hedgecock and  
51 Russell, 1975; Kunitomo et al., 2013). When placed on the region in a thermal gradient,  
52 where the temperature is higher than that of the past environment, animals migrate  
53 down the gradient toward the past cultivation temperature ( $T_c$ ). The migration is robust  
54 in a variety of thermal environments (Jurado et al., 2010; Ramot et al., 2008) and with  
55 deficiencies in the nervous system (Beverly et al., 2011; Luo et al., 2014a). By contrast,  
56 when placed on the region with a temperature lower than the  $T_c$ , animals flexibly switch  
57 from migration down to up the gradient (Hedgecock and Russell, 1975; Ito et al., 2006).  
58 Also in chemotaxis, animals show both the robust execution of migrations (Iino and  
59 Yoshida, 2009; Luo et al., 2014b; Wang et al., 2017) and the flexible switching between  
60 migrations up and down salt gradients (Klein et al., 2017; Ohno et al., 2014).  
61 Nevertheless, how robust and flexible migration in thermotaxis and chemotaxis is

62 achieved remains poorly understood.

63 A growing body of evidence suggests that neurons of *C. elegans* are  
64 multifunctional (Li et al., 2014; M. Liu et al., 2018), allowing a single neuron to  
65 contribute to multiple aspects of information processing within one or more circuits. By  
66 contrast, multiple distinct neurons often contribute to similar information processing  
67 (Beverly et al., 2011; Koo et al., 2011; Trojanowski et al., 2014). These one-to-many  
68 and many-to-one mappings in the nervous system, which are observed over many  
69 different animal species (Jankowska, 2001; Leonardo, 2005; Schiller, 1996; Shih et al.,  
70 2015), can be theoretically considered within the framework of *degeneracy* (Edelman  
71 and Gally, 2001; Tononi et al., 1999). Degeneracy refers to conditions where a system is  
72 conceptually composed of multiple subsystems whose components are partially shared.  
73 In this form, subsystems can coordinately produce the same output in some cases and  
74 produce different outputs from each other in other cases. Degeneracy is proposed to be  
75 one of a few strategies for a system to possess robustness and flexibility together  
76 (Wagner, 2005; Whitacre, 2010). Recently, two examples of *C. elegans* neurons with  
77 characteristics that suggest the implementation of degeneracy have been reported. 1)  
78 Depending on the temperature range during thermotaxis behavior, two thermosensory  
79 neurons, either AFD and AWC or AFD and ASI, are shown to be responsible for  
80 migration down a thermal gradient toward the  $T_c$  (Beverly et al., 2011). 2) Pharyngeal  
81 interneuron I1 can excite and inhibit the pumping rate via two different pharyngeal  
82 motor neurons, MC and M2, independently (Trojanowski et al., 2014). However, it  
83 remained unknown whether and how neural circuits, working together as a network  
84 system, implement degeneracy and how robustness and flexibility emerge from such  
85 circuit systems as features of behavior.

86 Here, we addressed these questions by analyzing the neural circuits generating *C.*  
87 *elegans* thermotaxis. By combining high-throughput behavioral analysis and  
88 comprehensive cell ablations, we identified sub-circuits that regulate behavioral

89 components, such as turns, reversals, and curves. These sub-circuits, required for the  
90 regulation of individual behavioral components, were distinct but highly overlapping. In  
91 a shared interneuron among sub-circuits, the regulation of different behavioral  
92 components was encoded in different ranges of neural activity according to the animals'  
93 moving direction relative to the  $T_c$ . We further found that when a deficiency in a  
94 sub-circuit was created, the behavioral components mediated by other sub-circuits  
95 compensated the defect, leading to the robust migration toward the  $T_c$ . Depending on  
96 whether the animals are above or below the  $T_c$ , similar but different sub-circuits  
97 generated opposing outputs in the same behavioral components, leading to the flexible  
98 switching between migrations up and down thermal gradients. Thus, our results  
99 demonstrate the implementation of degeneracy in the nervous system, identify a neural  
100 basis of circuit degeneracy, and show that circuit-level degeneracy ensures animals to  
101 execute robust and flexible behaviors.

102

103 **Results**

104 **Migration toward the Cultivation Temperature Is Driven by the Flexible**  
105 **Regulations of Multiple Behavioral Components**

106 *C. elegans* animals are known to navigate using a series of stereotyped movements,  
107 designated behavioral components (Croll, 1975; Iino and Yoshida, 2009;  
108 Pierce-Shimomura et al., 1999). We first attempted to extract the behavioral components  
109 during thermotaxis by employing a Multi-Worm Tracker (MWT) (Swierczek et al.,  
110 2011). MWT simultaneously captured the positions and postures of approximately 120  
111 animals (Figure 1A), and these data were further analyzed by a custom-built MATLAB  
112 script to detect the behavioral components (see Materials and methods).

113 For the thermotaxis assays, we set cultivation temperature ( $T_c$ ) as 20°C and the  
114 temperature of the center in the assay plate as either 17°C or 23°C (Figure 1B). Animals  
115 were placed at the center of the plate, and then we evaluated the animals' migrations by  
116 calculating thermotaxis index (TTX index), according to the equation shown in Figure  
117 1C. TTX index is 1 when all the animals are in the coldest fraction of the plate and 8  
118 when all the animals are in the warmest fraction. Consistent with our previous report  
119 (Ito et al., 2006), the animals reached their  $T_c$  within approximately 30 minutes in two  
120 conditions (Figure 1D and Movie S1), plate centered at 17°C or 23°C. In this study, we  
121 thus focused on the first 30 minutes from the start of the assays. To analyze the  
122 behaviors during the migrations toward the  $T_c$ , we analyzed the animals that were  
123 distributed in the center four fractions of the assay plate; 15.5–18.5°C for the  $T < T_c$   
124 condition and 21.5–24.5°C for the  $T > T_c$  condition (Figure 2A). Behaviors were  
125 essentially classified into three behavioral components: turns, reversals, and curves  
126 (Figure 2B). Turns were further classified into omega turns and shallow turns (Kim et  
127 al., 2011; Schild and Glauser, 2013), and reversals were further classified into reversals  
128 and reversal turns (Croll, 1975; Pierce-Shimomura et al., 1999; Salvador et al., 2014).

129 Our analyses show that the behavioral components were oppositely biased

130 depending on whether the animals were moving below or above the  $T_c$  ( $T < T_c$  or  $T > T_c$ )  
131 conditions, respectively) (Figures 2C–E). The frequencies of turns and reversals were  
132 measured as a function of the entry directions  $\theta$ , where  $\theta$  is the difference between the  
133 moving direction right before these behavioral events and the vector pointing to the  
134 warm side of the thermal gradient (Figure 2C). In the  $T < T_c$  condition, the frequencies of  
135 turns and reversals were higher when the animals were moving down the thermal  
136 gradient ( $\theta > 90$ ) than when the animals were moving up the thermal gradient ( $\theta < 90$ ),  
137 whereas in the  $T > T_c$  condition, the frequencies were higher when the animals were  
138 moving up the thermal gradient ( $\theta < 90$ ) than moving down the thermal gradient ( $\theta > 90$ )  
139 (Figure 2C). We also measured the fraction of the exit direction  $\Phi$  after the turns and the  
140 reversals, where  $\Phi$  is the angle between the direction right after these behavioral events  
141 and the vector pointing to the warm side of the thermal gradient (Figure 2D). The exit  
142 directions of shallow turns and reversals were biased toward the  $T_c$  both in the  $T < T_c$  and  
143  $T > T_c$  conditions; biased toward the warm side ( $\Phi < 90$ ) in the  $T < T_c$  condition whereas  
144 biased toward the cold side ( $\Phi > 90$ ) in the  $T > T_c$  condition (Figure 2D).

145 We also analyzed two components associated with forward movement: the curve  
146 direction and the locomotion speed. Curve direction was measured as the angle  $\varphi$ ,  
147 where  $\varphi$  was the angle between the past moving direction and the current moving  
148 direction (Figure 2E). Similar to the exit directions of shallow turns and reversals, curve  
149 direction was biased toward the warm side ( $\varphi > 0$ ) in the  $T < T_c$  condition and biased  
150 toward the cold side ( $\varphi < 0$ ) in the  $T > T_c$  condition (Figure 2E). The locomotion speed  
151 also showed the opposite bias under the  $T < T_c$  or  $T > T_c$  conditions. In the  $T < T_c$  condition,  
152 the locomotion speed was faster when the animals were moving up the thermal gradient  
153 ( $\theta < 90$ ) than when the animals were moving down the thermal gradient ( $\theta > 90$ ), whereas  
154 in the  $T > T_c$  condition, the locomotion speed was faster when the animals were moving  
155 down the thermal gradient ( $\theta > 90$ ) than moving up the thermal gradient ( $\theta < 90$ ) (Figure  
156 2F). It should be noted that in the  $T > T_c$  condition, the biases of turns, reversal, and

157 curves were observed in the time windows earlier than the biases in the  $T < T_c$  condition  
158 (Figures S1A–S1E), which may enable the faster migration toward the  $T_c$  when the  
159 animals are moving down toward the  $T_c$  than moving up toward the  $T_c$  (Ito et al., 2006;  
160 Luo et al., 2014a) (Figure 1D).

161 Taken together, our results suggest that sensory inputs of temperature increment  
162 and decrement are processed differently according to the relative position of the animals  
163 to the  $T_c$ , in which the behavioral components were oppositely regulated in  $T < T_c$  and  
164  $T > T_c$  conditions, thereby enabling the animals to migrate toward the  $T_c$ .

165

### 166 **Different Sets of Behavioral Components Are Employed Depending on Different** 167 **Temperature Environment Relative to the $T_c$**

168 Although the biases of behavioral components likely play essential roles in thermotaxis  
169 behavior (Figure 2), whether those biases are necessary and sufficient to drive the  
170 animals to migrate toward the  $T_c$  is unclear. To address this question, we conducted  
171 Monte Carlo simulations of animals' migrations on the thermal gradient. In the  
172 simulation, we defined an animal's state by its position in the assay plate ( $x, y$ ) and the  
173 direction of its movement relative to the vector pointing to the warm side of the thermal  
174 gradient ( $\theta$ ) (Figure 3A). We updated the states of animals every second, according to  
175 the experimental data of the turning frequencies, the exit directions of turns and curves  
176 ( $\Phi$  and  $\varphi$ ), and speeds ( $v$ ), as functions of  $\theta$  and  $T$  versus  $T_c$  (Figure S1A–S1F, see  
177 Materials and methods). Similar to the animals observed in thermotaxis assays,  
178 computer-simulated animals (sims) moved up and down the thermal gradient toward the  
179  $T_c$  within 30 minutes (Figure 3B and Movie S2), suggesting that the behavioral biases  
180 shown in Figure 2 are sufficient for the animals to reach the  $T_c$ .

181 The simulation was also executed to examine the contributions of the individual  
182 behavioral components. First, we simulated the situations in which the sims could not  
183 use one of the behavioral components (see Materials and methods). In the  $T < T_c$



184 condition, the removal of the curves impaired the increase of the TTX index most  
185 severely. In the  $T > T_c$  condition, the removal of the reversal turns impaired the decrease  
186 of the TTX index most severely (Figure 3C). Second, we performed the simulations in  
187 which the sims used only one of the behavioral components. In the  $T < T_c$  condition, the  
188 sims using only the curves showed the most dramatic increase of the TTX index (Figure  
189 3D), whereas the sims using only the reversal turns showed little increment of the index.  
190 By contrast, in the  $T > T_c$  condition, the reversal turns were most effective in decreasing  
191 the TTX index, and the curves also significantly caused a decrement of the TTX index.  
192 These analyses suggest that different sets of behavioral components contribute to the  
193 migration of the animals toward the  $T_c$  depending on the context ( $T$  versus  $T_c$ ).

194 We further assessed separately the contributions of the biases in the frequencies  
195 and the exit directions. The simulations in which the sims used only the frequency of  
196 reversal turns showed the increase of the TTX index (Figure 3E), whereas the sims  
197 allowed to use only the exit direction did not show any increment (Figure 3F). By  
198 contrast, the simulations in which the sims using only the exit direction of shallow turns  
199 showed an increase of the index (Figure 3F), whereas the sims used only the frequency  
200 showed little increment (Figure 3E). These results showed that the bias in the frequency  
201 of reversal turns contributes to the migration of the animals toward the  $T_c$ , whereas the  
202 bias in the exit direction of shallow turns contributes to the migration.

203 Although these results are consistent with the possibility that the difference of the  
204 temperature environment relative to the  $T_c$  is responsible for the different employment  
205 of the behavioral components (Figures 3C and 3D), it is also possible that the difference  
206 of absolute temperature may be responsible, since the animals are migrating in different  
207 temperature ranges (Figure 2A). Indeed, temperature itself is known to affect the turning  
208 frequencies and the speed of animals (Ryu and Samuel, 2002) (Figure S1G). To exclude  
209 the effect of absolute temperature, we next fixed the temperature of the center in the  
210 assay plate as 20°C and set the  $T_c$  as 17°C or 23°C (Figures S2A and S2B). Also in these

211 two conditions, our thermotaxis simulation reproduced the experimental data (Figure  
212 S2H). The simulations that disabled or allowed different individual behavioral  
213 components showed that 23°C cultivated animals moved up the thermal gradient toward  
214 the  $T_c$  by employing mainly the curves, whereas 17°C cultivated animals moved down  
215 the thermal gradient toward the  $T_c$  by employing mainly the reversal turns and the  
216 curves (Figures S2I and S2J). These results are similar to the results when  $T_c$  was  
217 constant and the center temperature varied (Figure 3), suggesting that context, not  
218 absolute temperature, is the important factor controlling impact of various behavioral  
219 components. Taken together, our results suggest that the animals switch the thermotactic  
220 behavioral strategies depending on the context of the temperature inputs, below or  
221 above the  $T_c$ .

222

### 223 **Overlapping but Distinct Neural Circuits Are Recruited for the Context-dependent** 224 **Regulation of Individual Behavioral Components**

225 To investigate how the biases of the behavioral components are encoded in neural  
226 circuits during thermotaxis behavior, we attempted to identify the neurons that regulate  
227 the behavioral components. Ablations of individual neurons (Figure 4A) were  
228 performed by expressing reconstituted caspases (Chelur and Chalfie, 2007) or  
229 mito-miniSOG (Qi et al., 2012) (Table S1, see Materials and methods). We ablated  
230 individual neurons such as thermosensory neurons AFD, AWC and ASI (Beverly et al.,  
231 2011; Biron et al., 2008; Kuhara et al., 2008; Mori and Ohshima, 1995), locomotory  
232 command interneurons AVA and AVE and head motor neurons RMD, RME, SMB, and  
233 SMD that had been previously shown to regulate a backward locomotion or a steering  
234 behavior, respectively (Chalfie et al., 1985; Hart et al., 1995; Hendricks et al., 2012;  
235 Kocabas et al., 2012), and a series of interneurons that are predicted to be critical for  
236 mediating information transmission or integration (Donnelly et al., 2013; Kotera et al.,  
237 2016; Li et al., 2014; Ma and Shen, 2012). To evaluate how individual cell ablations

238 affect the regulations of the behavioral components, we performed the thermotaxis  
239 simulations by using the experimental data of each behavioral component in the  
240 cell-ablated animals (Figures S5–S7). To quantify the performance of the simulations,  
241 we calculated migration index following the equation shown in Figure 4B. The  
242 difference between the TTX indices of cell-ablated animals and the indices of wild-type  
243 animals at a constant temperature was calculated every one minute and then summed up  
244 within 1–30 min. The value was divided, for normalization, by the summation of the  
245 difference between the indices of wild-type animals on the thermal gradient and the  
246 indices on the constant temperature. This index is 0 when biases of the behavioral  
247 components do not achieve any migration toward the  $T_c$  and +1 (–1) when biases  
248 achieve the same migration as wild-type animals in the  $T < T_c$  ( $T > T_c$ ) condition.

249 The ablations of AFD, AIB, AIZ, and SMD abolished the indices of the curves in  
250 both  $T < T_c$  and  $T > T_c$  conditions (Figure 4C), suggesting that these neurons play key  
251 roles in the regulation of the curves. Interestingly, the ablations of other neurons had  
252 different impacts on the indices of the curves under the  $T < T_c$  or  $T > T_c$  conditions. For  
253 example, the ablation of AWC impaired the indices only in the  $T < T_c$  condition, whereas  
254 the ablations of RIA and AVA impaired the indices only in the  $T > T_c$  condition. The  
255 index of the AIY-ablated animals was almost zero in the  $T < T_c$  condition but had  
256 non-zero value in the  $T > T_c$  condition. These results suggest that the different neurons  
257 are recruited to regulate the curves under the  $T < T_c$  or  $T > T_c$  conditions (Figure 4D). We  
258 applied the same analyses on the exit directions of the shallow turns (Figures 4E and  
259 S5C) and the speeds (Figures 4G and S5E). The indices of the shallow turns in the  
260 AIY-ablated animals were abolished (Figure 4E) in the  $T < T_c$  condition but remained  
261 relatively normal in the  $T > T_c$  condition. The indices of the speeds in the ASI-ablated  
262 animals and the AIZ-ablated animals were abolished in the  $T > T_c$  condition but remained  
263 relatively normal in the  $T < T_c$  condition (Figures 4G). These results suggest that  
264 different neural circuits are also recruited to regulate the shallow turns and the speeds

265 under the  $T < T_c$  or  $T > T_c$  conditions (Figures 4F and 4H).

266

267 **Redundancy and Compensatory Interactions among Sub-circuits Ensure Robust**  
268 **Migration toward the  $T_c$  under the Deficient Circuits**

269 Unlike the case of the curve, the shallow turn, and the speed, none of the ablations of  
270 single sensory neuron abolished the migration index of the reversal turns (Figures 5A  
271 and S6A), which were employed mainly in the  $T > T_c$  condition (Figures 3C–3E). To  
272 examine whether AFD and AWC sensory neurons, each of which shows small  
273 contribution to the indices (Figures 5A), redundantly regulate the reversal turns, we  
274 silenced AFD and AWC simultaneously. The indices of AFD-AWC double ablated  
275 animals were impaired more severely than those of the single ablated animals (Figures  
276 5C and S6B). We further analyzed the reversal turns of *gcy-23 gcy-8 gcy-18 ceh-36*  
277 quadruple mutants, where *gcy-23 gcy-8 gcy-18* triple mutants and *ceh-36* mutants have  
278 been regarded as the AFD-deficient animals and the AWC-deficient animals,  
279 respectively (Inada et al., 2006; Lanjuin et al., 2003). Similar to the AFD-AWC double  
280 ablated animals, the index of *gcy-23 gcy-8 gcy-18 ceh-36* quadruple mutants was  
281 abolished and was lower than the indices of *gcy-23 gcy-8 gcy-18* triple mutants and  
282 *ceh-36* mutants (Figures 5C and S6B). The index of *eat-4* mutants, which encodes the  
283 vesicular glutamate transporter EAT-4 expressed in both AFD and AWC (Ohnishi et al.,  
284 2011), was also completely impaired (Figures 5D and S6C). This phenotype was  
285 partially rescued by AFD-specific expression or AWC-specific expression of a wild-type  
286 *eat-4* cDNA (Figures 5D and S6B). These results support the idea that temperature input  
287 from both AFD and AWC are required to fully achieve the regulation of the reversal  
288 turns and that input from only AFD or only AWC can be independently processed to  
289 regulate the reversal turns.

290 We also noticed that the impairments in the index of a behavioral component  
291 sometimes accompany with the enhancement in the index of other behavioral

292 components. The ablations of AIA, AVE, and SMB impaired the indices of the speeds  
293 and the reversal turns (Figures 4G and 5A), whereas the indices of the curves and the  
294 omega turns of these cell-ablated animals were larger than the indices of wild-type  
295 animals (Figures 4C and 6A). Also, RIS-ablated animals showed the impaired index of  
296 the curves and the shallow turns (Figures 4C and 4E) but showed the enhanced index of  
297 the reversal turns (Figure 5A). Since the TTX indices in the assays showed that  
298 RIS-ablated animals and AVE-ablated animals migrated toward the  $T_c$  as successfully as  
299 wild-type animals (Figures 6D and 6E), the enhanced regulations of the behavioral  
300 components might help the migrations of the cell-ablated animals. Indeed, when we  
301 simulated the situations in which the reversal turn of RIS-ablated animals were replaced  
302 with those of the wild-type animals (Figure 6G), the decrement of the TTX index was  
303 partially prevented, suggesting that the enhanced regulation of the reversal turns helps  
304 the migration of RIS-ablated animals. The same kind of analyses on AVA-ablated  
305 animals also supported the compensatory interaction among the behavioral components  
306 (Figure 6H). It should be noted that none of the single-cell ablations, including the  
307 ablation of the sensory neurons and the motor neuron (Figures 6B and 6F), completely  
308 eliminated the migration toward the  $T_c$ . These results suggest that deficiencies in the  
309 nervous system are compensated by the sub-circuits regulating the behavioral  
310 components to execute the robust migration toward the  $T_c$ .

311

### 312 **Context-dependent Information Processing in a Single Interneuron Enables the** 313 **Regulation of Multiple Behavioral Components**

314 To understand how multiple behavioral components can be regulated in overlapping  
315 sub-circuits, we monitored the neural activity of AIB interneuron, which regulates both  
316 curves and the reversal turns in the  $T > T_c$  condition (Figures 4D, 5B, and 7A). We  
317 performed  $Ca^{2+}$  imaging in freely moving animals using the single-worm tracking  
318 (SWT) system (Tsukada et al., 2016) (Figure 7B). Like in MWT, we observed the bias

319 of both curve and reversal turn frequency using SWT (Figure 7C); when the animals  
320 were moving up the thermal gradient ( $\theta < 90$  i.e.  $dT/dt > 0$ ), the bias of the curves was  
321 stronger and the frequency of reversal turns was higher. Thus, we assessed the  
322 relationship between the activity of AIB and the behavioral components under the  
323  $dT/dt > 0$  and  $dT/dt < 0$  situations. Under the  $dT/dt > 0$  situation, the stronger bias of the  
324 curves was accompanied by the higher activity of AIB (Figure 7D), whereas there was  
325 no significant correlation between the reversal turn frequency and the AIB activity  
326 (Figure 7E). By contrast, under the  $dT/dt < 0$  situation, there was no significant  
327 correlation between the curve bias and the AIB activity, whereas lower frequency of  
328 reversal turns was accompanied by lower activity of AIB. We also checked the  
329 relationship between the activity of AIB and the differential of temperature input. As  
330 shown in the histogram (Figure 7F), the significant difference of the  $Ca^{2+}$  signal was not  
331 observed under the  $dT/dt > 0$  or  $dT/dt < 0$  situations (Figure 7G). These results suggest  
332 that different ranges of the AIB activity regulates the different behavioral components  
333 under the different situations; low AIB activity suppresses the frequency of the reversal  
334 turns when the animals are moving up the thermal gradient, and high AIB activity  
335 promotes the curves when moving down the thermal gradient. On the other hand, AIA  
336 interneuron, which mainly regulates the reversal turns in the  $T > T_c$  condition (Figures 5B  
337 and S8A), showed higher activity accompanied with lower frequency of reversal turns  
338 under both  $dT/dt < 0$  and  $dT/dt > 0$  situations (Figure S8G). In summary, the  
339 context-dependent regulation of behavioral components by different ranges of neural  
340 activity may enable one-to-many mappings between single neurons and multiple  
341 behavioral components, underlying the implementation of degeneracy.

342

343 **Discussion**

344 In this study, we show that thermotaxis is generated through overlapping but distinct  
345 sets of neural circuits, each of which differentially biases individual behavioral  
346 components depending on the context of the animals' position on a temperature gradient  
347 relative to the cultivation temperature. These observations can be considered within the  
348 framework of degeneracy (Edelman and Gally, 2001; Tononi et al., 1999), which  
349 theoretically provides both robustness and flexibility in a system (Wagner, 2005;  
350 Whitacre, 2010).

351 A system with degeneracy is composed of multiple subsystems whose components  
352 are partially shared. Consistent with this characteristic, we found that the sub-circuits  
353 that differently regulate the behavioral components overlap by sharing several neurons  
354 such as AFD, AIY, AIB, AIZ, and SMD (Figures 4, 5, S5–S7). Even after ablating the  
355 shared neuron, the regulations of some behavioral components were retained or  
356 enhanced, and the cell-ablated animals could still migrate toward the  $T_c$  (Figure 6).  
357 Because of such robustness in the deficient circuits, previous studies might have faced  
358 difficulties in identifying and defining neural circuits for thermotaxis (Beverly et al.,  
359 2011; Luo et al., 2014a). Similar problems might have appeared in the studies on other  
360 types of behavior such as isothermal tracking (Mori and Ohshima, 1995), chemotaxis  
361 (Guillermin et al., 2017; Iino and Yoshida, 2009; Luo et al., 2014b), and exploratory  
362 behavior (Gray et al., 2005). Also in crustacean and mammalian brain networks,  
363 robustness is an obstacle for inferring functional connections that can only be resolved  
364 by applying statistical methods (Schwab et al., 2010; Srinivasan and Stevens, 2011).  
365 Our observations suggest that by subdividing the behavior into behavioral components  
366 (Figure 2B), we can assess the contribution of individual neurons and link the nervous  
367 system with the behavior.

368 In a system that implements degeneracy, individual subsystems have independent  
369 contributions from each other to the entire output (Tononi et al., 1999). Therefore, if the

370 subdivisions of behavior are appropriate, the relative sub-circuits might be identified. In  
371 our study, the sub-circuits that mediate curves, the speed, and reversal turns are  
372 relatively well-defined (Figures 4D, 4H and 5B), suggesting that these subdivisions  
373 were successful. By contrast, the sub-circuits mediating shallow turns and omega turns  
374 were less defined (Figures 4F and S7B), suggesting that other classifications of turns  
375 might be needed to fully elucidate their underlying circuitry as some possibilities have  
376 been previously proposed (Broekmans et al., 2016; Kim et al., 2011). Also, non-rule  
377 based classifications of behaviors (Brown et al., 2013; Yamaguchi et al., 2018),  
378 especially the description of the state of the animal in shape space (Stephens et al.,  
379 2008), are reported to be successful in assessing the impact of cell-ablations (Hums et  
380 al., 2016; Yan et al., 2017) and might enable the definition of further sub-circuits.

381 We observed the context-dependent employments of the different sets of the  
382 behavioral components (Figures 3C and 3D) under the  $T < T_c$  or  $T > T_c$  conditions. Given  
383 such context-dependent aspects in a system, which is another characteristic of  
384 degeneracy, investigation of a system should be better performed under appropriate  
385 contexts relevant to a behavior in order to provide mechanistic insights of how a system  
386 operates. This might explain several disparities among previous studies on thermotaxis  
387 (Hedgecock and Russell, 1975; Luo et al., 2014a; Mori and Ohshima, 1995; Ohnishi et  
388 al., 2011; Ryu and Samuel, 2002). Some of these disparities were shown to be due to the  
389 difference of the thermal environments (Jurado et al., 2010; Ramot et al., 2008). On  
390 steep thermal gradients or in the temperature region distant from the  $T_c$ , the animals  
391 migrate toward the  $T_c$  in the  $T > T_c$  condition but not in the  $T < T_c$  condition. These  
392 features might reflect the context-dependent strategies of the nervous system observed  
393 in this study; the curves were mainly employed in the  $T < T_c$  condition and the reversal  
394 turns were mainly employed in the  $T > T_c$  condition (Figure 3). Indeed, the biases of the  
395 curves were weakened on the steep thermal gradient (Figure S3) and disappeared in the  
396 region distant from the  $T_c$  (Figure S4). These observations tell us that the discrimination



397 of contexts is a critical step to investigate the nervous system.

398 We also observed the context-dependent behavioral regulation by a single  
399 interneuron AIB (Figures 7D and 7E) under the  $dT/dt < 0$  or  $dT/dt > 0$  situations.  
400 Considering that the difference of the AIB activity itself was not observed under the two  
401 situations (Figures 7F and 7G) and that high (or low) activity of AIB is associated with  
402 a bias of the curves (or frequency of the reversal turns) under the  $dT/dt > 0$  (or  $dT/dt < 0$ )  
403 but not under the  $dT/dt < 0$  (or  $dT/dt > 0$ ) situation, the context-dependent regulations of  
404 the curves (or reversal turns) might be achieved by the dynamics of the entire  
405 sub-circuits (Figures 4D and 5B). In the neural networks of *Drosophila* larvae, for  
406 example, the ratio of neural activities in a circuit is shown to be critical for explaining  
407 behavioral choices (Jovanic et al., 2016). In addition, our calcium imaging analyses  
408 suggest that the different ranges of the AIB activity regulate the distinct behavioral  
409 components. Another first-layer interneuron AIY is indeed known to encode reversals  
410 and speeds through digital- and analog-like activities, respectively (Li et al., 2014).  
411 These context-dependent behavioral regulations by the different activity patterns of a  
412 single neuron might be a prevalent strategy for the nervous system to implement  
413 degeneracy.

414 Our MWT analyses demonstrated that the flexible switching between the  
415 migrations up and down the thermal gradient is achieved by the opposed bias of various  
416 behavioral components under the  $T < T_c$  or  $T > T_c$  conditions (Figures 2 and 3). For  
417 example, when the animals are moving up the thermal gradient in the  $T < T_c$  condition,  
418 the turning frequencies were lower, whereas when moving up in the  $T > T_c$  condition, the  
419 turning frequencies were higher (Figure 2C). One candidate source for this flexibility is  
420 the neurotransmission from sensory neurons to interneurons. Several studies have  
421 reported that a single sensory neuron can evoke different kind of responses in an  
422 identical interneuron through glutamatergic and/or peptidergic transmissions  
423 (Guillermin et al., 2017; Kuhara et al., 2011; Narayan et al., 2011; Tsunozaki et al.,

424 2008). Such alterations in synaptic activity can drive opposite behaviors in response to  
425 identical stimuli (Cho et al., 2016; Guillermin et al., 2017; Hawk et al., 2018). Another  
426 candidate source is the effects of feedback from downstream neurons. In interneuron  
427 and motor neuron layers, the motor command sequences are always represented even  
428 when the animals are not moving (Hendricks et al., 2012; Kato et al., 2015; Wen et al.,  
429 2012). Therefore, the activities of the upstream interneurons could be modulated by  
430 those pervasive dynamics. Indeed, the response of AIB to odor stimuli via the AWC  
431 sensory neuron is affected by the state of the downstream interneurons RIM and AVA  
432 (Gordus et al., 2015). Some studies have suggested that sensory inputs could be  
433 converted into appropriate motor outputs after being integrated with those dynamics  
434 (Hendricks and Zhang, 2013; H. Liu et al., 2018). Also in mammalian brains, feedback  
435 from downstream neurons are known to play an important role in the visual system  
436 (Pascual-Leone and Walsh, 2001) or somatosensory system (Manita et al., 2015). These  
437 interactions with pervasive dynamics might result in the context-dependent recruitments  
438 of the different sub-circuits (Figures 4D, 4E and 4H). Our analysis indicated that the  
439 different class of head motor neurons, SMD and RME, were recruited differently to  
440 regulate the curves and the shallow turns under the  $T < T_c$  or  $T > T_c$  conditions. Since  
441 these neurons are excitatory and inhibitory neurons, respectively, such  
442 context-dependent recruitments of different head motor neurons might enable the  
443 opposed regulations of the behavioral components.

444 Our study shows that the implementation of circuit degeneracy may be a prevalent  
445 strategy for the nervous system to execute robust and flexible behavior, which is a  
446 sophisticated aspect of animal behavior.

447

448 **Materials and Methods**

449 **Strains**

450 *C. elegans* animals were cultivated under the standard condition (Brenner, 1974). Adult  
451 hermaphrodites were used in this study. N2 (Bristol) was the wild-type strain, and all the  
452 other strains used in this study were derived from N2.

453 Cell-ablated strains were generated by the expression of reconstituted caspases  
454 (Chelur and Chalfie, 2007) and by mito-miniSOG with the FLP/FRT strategy (Davis et  
455 al., 2008; Qi et al., 2012). Each of the plasmids expressing reconstituted caspase was  
456 injected at 25 ng/μl and each of the plasmids expressing mito-miniSOG was injected at  
457 50–75 ng/μl, and in both cases, pKDK66 (*ges-1p::NLS::GFP*) (50 ng/μl) was  
458 co-injected as an injection marker. Cell-specific expressions were achieved by using the  
459 promoter sets listed in Table S1. Specificity was confirmed by expressing TagRFP under  
460 the listed promoter sets with the FLP/FRT strategy and also by checking the  
461 fluorescence from miniSOG. Extrachromosomal arrays were integrated into the genome  
462 via gamma irradiation-induced mutagenesis except for *njIs127*, which was  
463 spontaneously generated through the daily maintenance, and outcrossed more than four  
464 times before analysis. PY7505 was kindly provided by Piali Sengupta, Brandeis  
465 University, MA, USA (Beverly et al., 2011).

466 Integrants of recCaspases were crossed into integrated reporter lines listed in  
467 Table S2 that express GFPs or TagRFPs in several neurons including the neuron of  
468 interest. Losses of neurons were confirmed at the adult stage by the disappearance of  
469 fluorescence from the reporter proteins. Plates containing OP50 and the L1 stage  
470 animals expressing mito-miniSOG were exposed, without any covers, to pulsed blue  
471 light (488 nm) in 0.5 sec on and 1.5 sec off cycles for 30 min. The blue light intensity  
472 received by the animals was measured as 106 mW/cm<sup>2</sup>. Losses of neurons were  
473 confirmed at the adult stage by the disappearance of fluorescence from the miniSOG. To  
474 control the shutters, we used five spot-type deep UV lamps (SP-9250EF-N, USHIO)

475 connected by light guide fiber units (SP-155XQ-S11, USHIO) and a control box  
476 (SP-SC-N, USHIO). The efficiencies of the cell ablations are also listed in Table S1.

477

#### 478 **Thermotaxis Assay**

479 Thermotaxis (TTX) assays were performed as previously described (Ito et al., 2006).  
480 Animals cultivated at 17 °C, 20 °C, or 23 °C were placed on the center of the assay  
481 plate (13.6 cm×9.6 cm, 1.45 cm height) containing 18 ml of TTX medium with 2% agar,  
482 and were allowed to freely move for 60 min. The center of the plate was adjusted at  
483 14 °C, 17 °C, 20 °C, 23 °C, and 26 °C depending on the experiments. The plate was  
484 maintained with a linear thermal gradient of approximately 0.45 °C/cm.

485

#### 486 **Behavioral Recording**

487 Behavioral recordings were performed using a Multi-Worm Tracker (Swierczek et al.,  
488 2011; Yamaguchi et al., 2018) with a CMOS sensor Camera Link Camera (8 bits, 4,096  
489 × 3,072 pixels; CSC12M25BMP19-01B, Toshiba-Teli), a lens adaptor (F-TAR2), a  
490 Line-Scan Lens (35mm, f/2.8; YF3528, PENTAX), and a PCIe-1433 camera-link frame  
491 grabber (781169-01, National Instruments). The camera was mounted at a distance  
492 above the assay plate resulting in an image with 33.2 μm per pixel. The frame rate of  
493 recordings was approx. 13.5 Hz. Images were captured and processed by custom  
494 software written in LabView (National Instruments) and a custom image analysis library  
495 written in C++, which detect animals and measure parameters such as the positions and  
496 the postures of animals.

497

#### 498 **Behavioral Analysis**

499 The MWT system automatically identifies animals and provides the positions of their  
500 centers of mass and the 11 points along their bodies, as well as their body lengths,  
501 widths, and so on (Swierczek et al., 2011). Using these data, the behavioral analysis was

502 performed with a custom-built MATLAB (MathWorks) script. For each frame, we  
503 defined the moving direction as the vectors from the current centroid to the following  
504 centroid (1 sec after), and calculated the *curve* by the angle between the previous  
505 moving direction (1 sec before) and the current moving direction. When an animal  
506 performs the *omega turn*, its head and tail become close together accompanying the  
507 decrease of the estimated body length in the system. Therefore, if the body length was  
508 estimated shorter than 1.5 standard deviation from the mean and the curve value at that  
509 time was greater than  $90^\circ/\text{sec}$ , we regarded the animal as performing the omega turn. To  
510 detect *shallow turns*, we defined the head swing for each frame as the angle between the  
511 vector from the 3rd point to the 1st point and the vector from the 7th point to the 5th  
512 point along the worm's body. If the head swing was over 2 standard deviation from the  
513 mean and the curve value at that time was in the range of  $15\text{--}90^\circ$ , we regarded the  
514 worm as performing the shallow turn. *Reversals* were detected by the smoothed curve  
515 (the moving average of the curves within three frames) which was greater than  $150^\circ/\text{sec}$ .  
516 If a reversal was followed by an omega turn within 6 seconds, these two components  
517 were combined into a *reversal turn* (Iino and Yoshida, 2009; Pierce-Shimomura et al.,  
518 1999). All the curve thresholds described above were determined following the previous  
519 proposals (Kim et al., 2011; Schild and Glauser, 2013).

520

## 521 **Computer Simulation**

522 Thermotaxis behavior was simulated using another custom-built MATLAB script. For  
523 each simulation, 100 animals were run sequentially. Animals were considered as  
524 dimensionless points in a 13.6 cm (x axis)  $\times$  9.6 cm (y axis) plate, with a linear thermal  
525 gradient from 14 to 20 °C for the  $T < T_c$  condition and from 20 to 26 °C for the  $T > T_c$   
526 condition along the x axis. Animals started from the center of a plate, while y  
527 coordinates and initial directions were randomized. For every second, animals decided  
528 whether to do an omega turn, a shallow turn, a reversal, a reversal turn, or a curve

529 (Figure 3A). Event probabilities of each behavioral component were defined according  
530 to the experimental data of turning frequencies. When animals decided to do any turns,  
531 the next moving directions ( $\theta$ ) were defined according to the experimental data of exit  
532 directions ( $\Phi$ ). The next positions ( $x$ ,  $y$ ) were defined together with the experimental  
533 data of the displacements during the individual turns that were also calculated in MWT  
534 analysis. When animals decided to do a curve, the next moving directions  $\theta$  were  
535 defined according to the experimental data of curving biases ( $\varphi$ ). The next positions ( $x$ ,  
536  $y$ ) were defined together with the experimental data of the speed. If an animal reaches  
537 the plate border, it was set to do specular reflection. When disabling each of the  
538 behavioral components (Figure 3C), we replaced the experimental data of interest with  
539 the data taken from the animals on the constant temperature. When enabling each of the  
540 behavioral components, we replaced the experimental data of interest on the constant  
541 temperature with the data taken from the animals on the thermal gradient. When  
542 exchanging each of the behavioral components (Figure 6G), we replaced the  
543 experimental data of interest with the data taken from the wild-type animals on the  
544 thermal gradient, while the probability of a curve (Figure 3A) was kept same. Every  
545 experimental data was applied as a function of moving direction  $\theta$ . Besides, different  
546 data set were applied depending on whether the animals were on the fraction 1–2, the  
547 fraction 3–6, or the fraction 7–8 of a thermotaxis plate (Figure 1C). Each simulation  
548 lasts for 30 min, and the simulations were iterated 100 times and the time courses of  
549 TTX indices were averaged within them.

550

### 551 **Calcium Imaging in Freely Moving Animals**

552  $\text{Ca}^{2+}$  imaging recordings in freely moving animals were performed as previously  
553 described (Tsukada et al., 2016) with custom modifications. The FRET-based calcium  
554 probe yellow cameleon X 1.60 was expressed in the neuron of interest (Table S2). A  
555 dual-view was equipped with 05-EM CFP/YFP (505 dcxr) filter cube (Molecular

556 Devices), and images were acquired using EM-CCD camera (C9100-13, Hamamatsu  
557 Photonics). Simultaneous tracking was performed using a CMOS camera (Grasshopper  
558 Express GX-FW-28S5M-C, FLIR Integrated Imaging Solutions) at 30 frames per  
559 second with continuous halogen illumination (TH4-100, Olympus) through an IR filter  
560 (IR-76, Fujifilm). Along the trajectory of animals (Figures 7B and S8B), behavioral  
561 components were detected in a similar way to that in the MWT analysis, and the same  
562 regulations of the curves and the reversal turns were observed (Figures S7B and S7C).

563

#### 564 **Imaging Analysis**

565 The image processing program for the tracking data was written in MATLAB. A  
566 neuronal region was defined according to the peak intensity and size (9 pixels) in an  
567 YFP image. In each image, the averaged background intensity within 9 pixels was  
568 subtracted from the average fluorescence intensities of the neuronal regions.  
569 Intercellular calcium concentration change was estimated by taking the YFP/CFP  
570 fluorescence ratio (*Ratio*) and YFP/CFP ratio change (*Ratio change*), which was  
571 normalized within each assay (*Standardized ratio change*) to compare the activity  
572 among the assays. A median filter within a moving 15 sec temporal window was applied  
573 to the time course ratio to eliminate the noise independent from calcium signal. The  
574 *averaged curve* was calculated by averaging the curves within a moving 90 sec  
575 temporal window. For the analysis of the relationship between the neural activities and  
576 the regulations of the behavioral components, we defined an activity that was higher  
577 than the median of all the activities within an assay as a *High activity* and an activity  
578 that was lower than the median as a *Low activity*.

579

#### 580 **Quantification and Statistical Analysis**

581 Experimental data are expressed as mean  $\pm$  SEM. Simulation data are expressed as  
582 mean. For comparison of the data from behavioral analysis in MWT, we used a paired

583 Student's *t*-test and a one-way ANOVA followed by a Tukey–Kramer post hoc multiple  
584 comparisons test. For comparison of the data from imaging experiments, we used a  
585 paired Student's *t*-test, pairwise test for multiple comparisons using Holm's method, and  
586 Friedman rank sum test together with repetitive Wilcoxon signed rank tests as noted in  
587 the figure legends. Bartlett's test was used to check for differences in variance among  
588 the groups. A difference is considered significant at a value of  $**p < 0.01$  or  $*p < 0.05$ .  
589



590 **Acknowledgements**

591 We thank Martin Chalfie for the reconstituted caspases construct (Addgene plasmids  
592 #16082 and #16083); Yishi Jin for the mito-miniSOG construct; Seika Takayanagi-Kiya  
593 for the advice on the usage of mito-miniSOG; Eduardo Izquierdo for the advice on the  
594 assessment of the simulation; Erik Jorgensen for the FLP and FRT construct; Piali  
595 Sengupta for the ASI-ablated strain; Shin Takagi for the unpublished AVE marker strain;  
596 Kaveh Ashrafi for the *mgl-1* promoter; Mario de Bono for the *npr-4a* promoter; and  
597 Shawn Xu for the information about the *sto-3* promoter. M.I. was supported by  
598 KAKENHI 16J05770, A.C.G. by JSPS Postdoctoral Fellowship PE12065, and this work  
599 was supported by KAKENHI 16H02516 (to I.M.).

600

601 **Competing interests**

602 The authors declare no competing interests.

603

604 **References**

- 605 Beverly M, Anbil S, Sengupta P. 2011. Degeneracy and neuromodulation among  
606 thermosensory neurons contribute to robust thermosensory behaviors in  
607 *Caenorhabditis elegans*. *J Neurosci* **31**:11718–27.  
608 doi:10.1523/JNEUROSCI.1098-11.2011
- 609 Biron D, Wasserman S, Thomas JH, Samuel ADT, Sengupta P. 2008. An olfactory  
610 neuron responds stochastically to temperature and modulates *Caenorhabditis*  
611 *elegans* thermotactic behavior. *Proc Natl Acad Sci U S A* **105**:11002–7.  
612 doi:10.1073/pnas.0805004105
- 613 Brenner S. 1974. The genetics of *Caenorhabditis elegans*. *Genetics* **77**:71–94.
- 614 Broekmans OD, Rodgers JB, Ryu WS, Stephens GJ. 2016. Resolving coiled shapes  
615 reveals new reorientation behaviors in *C. elegans*. *Elife* **5**. doi:10.7554/eLife.17227
- 616 Brown AEX, Yemini EI, Grundy LJ, Jucikas T, Schafer WR. 2013. A dictionary of  
617 behavioral motifs reveals clusters of genes affecting *Caenorhabditis elegans*  
618 locomotion. *Proc Natl Acad Sci U S A* **110**:791–6. doi:10.1073/pnas.1211447110
- 619 Chalfie M, Sulston JE, White JG, Southgate E, Thomson JN, Brenner S. 1985. The  
620 neural circuit for touch sensitivity in *Caenorhabditis elegans*. *J Neurosci*  
621 **5**:956–64.
- 622 Chelur DS, Chalfie M. 2007. Targeted cell killing by reconstituted caspases. *Proc Natl*  
623 *Acad Sci U S A* **104**:2283–8. doi:10.1073/pnas.0610877104
- 624 Cho CE, Brueggemann C, L’Etoile ND, Bargmann CI. 2016. Parallel encoding of  
625 sensory history and behavioral preference during *Caenorhabditis elegans* olfactory  
626 learning. *Elife* **5**. doi:10.7554/eLife.14000
- 627 Croll NA. 1975. Components and patterns in the behaviour of the nematode  
628 *Caenorhabditis elegans*. *J Zool* **176**:159–176.  
629 doi:10.1111/j.1469-7998.1975.tb03191.x
- 630 Davis MW, Morton JJ, Carroll D, Jorgensen EM. 2008. Gene activation using FLP  
631 recombinase in *C. elegans*. *PLoS Genet* **4**:e1000028.  
632 doi:10.1371/journal.pgen.1000028
- 633 Donnelly JL, Clark CM, Leifer AM, Pirri JK, Haburcak M, Francis MM, Samuel ADT,  
634 Alkema MJ. 2013. Monoaminergic Orchestration of Motor Programs in a Complex  
635 *C. elegans* Behavior. *PLoS Biol* **11**:e1001529. doi:10.1371/journal.pbio.1001529
- 636 Edelman GM, Gally JA. 2001. Degeneracy and complexity in biological systems. *Proc*  
637 *Natl Acad Sci* **98**:13763–13768. doi:10.1073/pnas.231499798
- 638 Gordus A, Pokala N, Levy S, Flavell SW, Bargmann CI. 2015. Feedback from network  
639 states generates variability in a probabilistic olfactory circuit. *Cell* **161**:215–227.  
640 doi:10.1016/j.cell.2015.02.018
- 641 Gray JM, Hill JJ, Bargmann CI. 2005. A circuit for navigation in *Caenorhabditis*  
642 *elegans*. *Proc Natl Acad Sci U S A* **102**:3184–91. doi:10.1073/pnas.0409009101
- 643 Guillermin ML, Carrillo MA, Hallem EA. 2017. A Single Set of Interneurons Drives  
644 Opposite Behaviors in *C. elegans*. *Curr Biol* **27**:2630–2639.e6.  
645 doi:10.1016/j.cub.2017.07.023
- 646 Hart AC, Sims S, Kaplan JM. 1995. Synaptic code for sensory modalities revealed by *C.*  
647 *elegans* GLR-1 glutamate receptor. *Nature* **378**:82–5. doi:10.1038/378082a0
- 648 Hawk JD, Calvo AC, Liu P, Almoril-Porras A, Aljobeh A, Torruella-Suárez ML, Ren I,  
649 Cook N, Greenwood J, Luo L, Wang ZW, Samuel ADT, Colón-Ramos DA. 2018.

- 650 Integration of Plasticity Mechanisms within a Single Sensory Neuron of *C. elegans*  
651 Actuates a Memory. *Neuron* **97**:356–367.e4. doi:10.1016/j.neuron.2017.12.027
- 652 Hedgecock EM, Russell RL. 1975. Normal and mutant thermotaxis in the nematode  
653 *Caenorhabditis elegans*. *Proc Natl Acad Sci U S A* **72**:4061–5.
- 654 Heintz S, Grabherr R. 2017. Systems biology of robustness and flexibility: *Lactobacillus*  
655 *buchneri* —A show case. *J Biotechnol* **257**:61–69.  
656 doi:10.1016/j.jbiotec.2017.01.007
- 657 Hendricks M, Ha H, Maffey N, Zhang Y. 2012. Compartmentalized calcium dynamics  
658 in a *C. elegans* interneuron encode head movement. *Nature* **487**:99–103.  
659 doi:10.1038/nature11081
- 660 Hendricks M, Zhang Y. 2013. Complex RIA calcium dynamics and its function in  
661 navigational behavior. *Worm* **2**:e25546. doi:10.4161/worm.25546
- 662 Honma K, Hashimoto S, Nakao M, Honma S. 2003. Period and Phase Adjustments of  
663 Human Circadian Rhythms in the Real World. *J Biol Rhythms* **18**:261–270.  
664 doi:10.1177/0748730403018003008
- 665 Hums I, Riedl J, Mende F, Kato S, Kaplan HS, Latham R, Sonntag M, Traunmüller L,  
666 Zimmer M. 2016. Regulation of two motor patterns enables the gradual adjustment  
667 of locomotion strategy in *Caenorhabditis elegans*. *Elife* **5**:e14116.  
668 doi:10.7554/eLife.14116
- 669 Iino Y, Yoshida K. 2009. Parallel use of two behavioral mechanisms for chemotaxis in  
670 *Caenorhabditis elegans*. *J Neurosci* **29**:5370–80.  
671 doi:10.1523/JNEUROSCI.3633-08.2009
- 672 Inada H, Ito H, Satterlee J, Sengupta P, Matsumoto K, Mori I. 2006. Identification of  
673 guanylyl cyclases that function in thermosensory neurons of *Caenorhabditis*  
674 *elegans*. *Genetics* **172**:2239–52. doi:10.1534/genetics.105.050013
- 675 Ito H, Inada H, Mori I. 2006. Quantitative analysis of thermotaxis in the nematode  
676 *Caenorhabditis elegans*. *J Neurosci Methods* **154**:45–52.  
677 doi:10.1016/j.jneumeth.2005.11.011
- 678 Jankowska E. 2001. Spinal interneuronal systems: identification, multifunctional  
679 character and reconfigurations in mammals. *J Physiol* **533**:31–40.
- 680 Jovanic T, Schneider-Mizell CM, Shao M, Masson J-B, Denisov G, Fetter RD, Menseh  
681 BD, Truman JW, Cardona A, Zlatić M. 2016. Competitive Disinhibition Mediates  
682 Behavioral Choice and Sequences in *Drosophila*. *Cell* **167**:858–870.e19.  
683 doi:10.1016/j.cell.2016.09.009
- 684 Jurado P, Kodama E, Tanizawa Y, Mori I. 2010. Distinct thermal migration behaviors in  
685 response to different thermal gradients in *Caenorhabditis elegans*. *Genes Brain*  
686 *Behav* **9**:120–7. doi:10.1111/j.1601-183X.2009.00549.x
- 687 Kato S, Kaplan HS, Schrödel T, Skora S, Lindsay TH, Yemini E, Lockery S, Zimmer M.  
688 2015. Global Brain Dynamics Embed the Motor Command Sequence of  
689 *Caenorhabditis elegans*. *Cell* **163**:656–69. doi:10.1016/j.cell.2015.09.034
- 690 Kim D, Park S, Mahadevan L, Shin JH. 2011. The shallow turn of a worm. *J Exp Biol*  
691 **214**:1554–9. doi:10.1242/jeb.052092
- 692 Kitano H. 2004. Biological robustness. *Nat Rev Genet* **5**:826–837. doi:10.1038/nrg1471
- 693 Klein M, Krivov S V, Ferrer AJ, Luo L, Samuel AD, Karplus M. 2017. Exploratory  
694 search during directed navigation in *C. elegans* and *Drosophila* larva. *Elife* **6**.  
695 doi:10.7554/eLife.30503
- 696 Kocabas A, Shen C-H, Guo Z V, Ramanathan S. 2012. Controlling interneuron activity

- 697 in *Caenorhabditis elegans* to evoke chemotactic behaviour. *Nature* **490**:273–7.  
698 doi:10.1038/nature11431
- 699 Koo PK, Bian X, Sherlekar AL, Bunkers MR, Lints R. 2011. The robustness of  
700 *Caenorhabditis elegans* male mating behavior depends on the distributed  
701 properties of ray sensory neurons and their output through core and male-specific  
702 targets. *J Neurosci* **31**:7497–510. doi:10.1523/JNEUROSCI.6153-10.2011
- 703 Kotera I, Tran NA, Fu D, Kim JH, Byrne Rodgers JD, Ryu WS. 2016. Pan-neuronal  
704 screening in *Caenorhabditis elegans* reveals asymmetric dynamics of AWC  
705 neurons is critical for thermal avoidance behavior. *Elife* **5**.  
706 doi:10.7554/eLife.19021
- 707 Kuhara A, Ohnishi N, Shimowada T, Mori I. 2011. Neural coding in a single sensory  
708 neuron controlling opposite seeking behaviours in *Caenorhabditis elegans*. *Nat*  
709 *Commun* **2**:355. doi:10.1038/ncomms1352
- 710 Kuhara A, Okumura M, Kimata T, Tanizawa Y, Takano R, Kimura KD, Inada H,  
711 Matsumoto K, Mori I. 2008. Temperature sensing by an olfactory neuron in a  
712 circuit controlling behavior of *C. elegans*. *Science* **320**:803–807.  
713 doi:10.1126/science.1148922
- 714 Kunitomo H, Sato H, Iwata R, Satoh Y, Ohno H, Yamada K, Iino Y. 2013.  
715 Concentration memory-dependent synaptic plasticity of a taste circuit regulates salt  
716 concentration chemotaxis in *Caenorhabditis elegans*. *Nat Commun* **4**:2210.  
717 doi:10.1038/ncomms3210
- 718 Lanjuin A, VanHoven MK, Bargmann CI, Thompson JK, Sengupta P. 2003. Otx/otd  
719 homeobox genes specify distinct sensory neuron identities in *C. elegans*. *Dev Cell*  
720 **5**:621–33.
- 721 Leonardo A. 2005. Degenerate coding in neural systems. *J Comp Physiol A*  
722 **191**:995–1010. doi:10.1007/s00359-005-0026-0
- 723 Li Z, Liu J, Zheng M, Xu XZS. 2014. Encoding of Both Analog- and Digital-like  
724 Behavioral Outputs by One *C. elegans* Interneuron. *Cell* **159**:751–765.  
725 doi:10.1016/j.cell.2014.09.056
- 726 Liu H, Yang W, Wu T, Duan F, Soucy E, Jin X, Zhang Y. 2018. Cholinergic  
727 Sensorimotor Integration Regulates Olfactory Steering. *Neuron* **97**:390–405.e3.  
728 doi:10.1016/j.neuron.2017.12.003
- 729 Liu M, Sharma AK, Shaevitz J, Leifer AM. 2018. Temporal processing and context  
730 dependency in *C. elegans* response to mechanosensation. *Elife* **7**:e36419.  
731 doi:10.7554/eLife.36419
- 732 Luo L, Cook N, Venkatachalam V, Martinez-Velazquez LA, Zhang X, Calvo AC,  
733 Hawk J, MacInnis BL, Frank M, Ng JHR, Klein M, Gershow M, Hammarlund M,  
734 Goodman MB, Colón-Ramos DA, Zhang Y, Samuel ADT. 2014a. Bidirectional  
735 thermotaxis in *Caenorhabditis elegans* is mediated by distinct sensorimotor  
736 strategies driven by the AFD thermosensory neurons. *Proc Natl Acad Sci U S A*  
737 **111**:2776–81. doi:10.1073/pnas.1315205111
- 738 Luo L, Wen Q, Ren J, Hendricks M, Gershow M, Qin Y, Greenwood J, Soucy ER,  
739 Klein M, Smith-Parker HK, Calvo AC, Colón-Ramos DA, Samuel ADT, Zhang Y.  
740 2014b. Dynamic encoding of perception, memory, and movement in a *C. elegans*  
741 chemotaxis circuit. *Neuron* **82**:1115–28. doi:10.1016/j.neuron.2014.05.010
- 742 Ma X, Shen Y. 2012. Structural basis for degeneracy among thermosensory neurons in  
743 *Caenorhabditis elegans*. *J Neurosci* **32**:1–3.  
744 doi:10.1523/JNEUROSCI.5112-11.2012

- 745 Macmillan M. 2000. Restoring Phineas Gage: A 150th Retrospective. *J Hist Neurosci*  
746 **9**:46–66. doi:10.1076/0964-704X(200004)9:1;1-2;FT046
- 747 Maddox J. 1994. Cocktail party effect made tolerable. *Nature* **369**:517–517.  
748 doi:10.1038/369517a0
- 749 Manita S, Suzuki T, Homma C, Matsumoto T, Odagawa M, Yamada K, Ota K,  
750 Matsubara C, Inutsuka A, Sato M, Ohkura M, Yamanaka A, Yanagawa Y, Nakai J,  
751 Hayashi Y, Larkum ME, Murayama M. 2015. A Top-Down Cortical Circuit for  
752 Accurate Sensory Perception. *Neuron* **86**:1304–1316.  
753 doi:10.1016/j.neuron.2015.05.006
- 754 Meir E, von Dassow G, Munro E, Odell GM. 2002. Robustness, flexibility, and the role  
755 of lateral inhibition in the neurogenic network. *Curr Biol* **12**:778–86.
- 756 Meyer BU, Röricht S, Niehaus L. 1998. Morphology of acallosal brains as assessed by  
757 MRI in six patients leading a normal daily life. *J Neurol* **245**:106–10.
- 758 Mori I, Ohshima Y. 1995. Neural regulation of thermotaxis in *Caenorhabditis elegans*.  
759 *Nature* **376**:344–8. doi:10.1038/376344a0
- 760 Narayan A, Laurent G, Sternberg PW. 2011. Transfer characteristics of a thermosensory  
761 synapse in *Caenorhabditis elegans*. *Proc Natl Acad Sci U S A* **108**:9667–72.  
762 doi:10.1073/pnas.1106617108
- 763 Ohnishi N, Kuhara A, Nakamura F, Okochi Y, Mori I. 2011. Bidirectional regulation of  
764 thermotaxis by glutamate transmissions in *Caenorhabditis elegans*. *EMBO J*  
765 **30**:1376–88. doi:10.1038/emboj.2011.13
- 766 Ohno H, Kato S, Naito Y, Kunitomo H, Tomioka M, Iino Y. 2014. Role of synaptic  
767 phosphatidylinositol 3-kinase in a behavioral learning response in *C. elegans*.  
768 *Science* **345**:313–317. doi:10.1126/science.1250709
- 769 Okamoto H, Aizawa H. 2013. Fear and anxiety regulation by conserved affective  
770 circuits. *Neuron* **78**:411–3. doi:10.1016/j.neuron.2013.04.031
- 771 Pascual-Leone A, Walsh V. 2001. Fast Backprojections from the Motion to the Primary  
772 Visual Area Necessary for Visual Awareness. *Science* **292**:510–512.  
773 doi:10.1126/science.1057099
- 774 Pierce-Shimomura JT, Morse TM, Lockery SR. 1999. The fundamental role of  
775 pirouettes in *Caenorhabditis elegans* chemotaxis. *J Neurosci* **19**:9557–69.
- 776 Qi YB, Garren EJ, Shu X, Tsien RY, Jin Y. 2012. Photo-inducible cell ablation in  
777 *Caenorhabditis elegans* using the genetically encoded singlet oxygen generating  
778 protein miniSOG. *Proc Natl Acad Sci U S A* **109**:7499–504.  
779 doi:10.1073/pnas.1204096109
- 780 Ramot D, MacInnis BL, Lee H-C, Goodman MB. 2008. Thermotaxis is a robust  
781 mechanism for thermoregulation in *Caenorhabditis elegans* nematodes. *J Neurosci*  
782 **28**:12546–57. doi:10.1523/JNEUROSCI.2857-08.2008
- 783 Ryu WS, Samuel ADT. 2002. Thermotaxis in *Caenorhabditis elegans* analyzed by  
784 measuring responses to defined Thermal stimuli. *J Neurosci* **22**:5727–33.  
785 doi:20026542
- 786 Salvador LCM, Bartumeus F, Levin SA, Ryu WS. 2014. Mechanistic analysis of the  
787 search behaviour of *Caenorhabditis elegans*. *J R Soc Interface* **11**:20131092.  
788 doi:10.1098/rsif.2013.1092
- 789 Saper CB, Chou TC, Elmquist JK. 2002. The need to feed: homeostatic and hedonic  
790 control of eating. *Neuron* **36**:199–211.
- 791 Schild LC, Glauser DA. 2013. Dynamic switching between escape and avoidance

- 792 regimes reduces *Caenorhabditis elegans* exposure to noxious heat. *Nat Commun*  
793 4:2198. doi:10.1038/ncomms3198
- 794 Schiller PH. 1996. On the specificity of neurons and visual areas. *Behav Brain Res*  
795 76:21–35.
- 796 Schwab DJ, Bruinsma RF, Feldman JL, Levine AJ. 2010. Rhythmogenic neuronal  
797 networks, emergent leaders, and k-cores. *Phys Rev E* 82:051911.  
798 doi:10.1103/PhysRevE.82.051911
- 799 Shih C-T, Sporns O, Yuan S-L, Su T-S, Lin Y-J, Chuang C-C, Wang T-Y, Lo C-C,  
800 Greenspan RJ, Chiang A-S. 2015. Connectomics-Based Analysis of Information  
801 Flow in the *Drosophila* Brain. *Curr Biol* 25:1249–1258.  
802 doi:10.1016/j.cub.2015.03.021
- 803 Srinivasan S, Stevens CF. 2011. Robustness and fault tolerance make brains harder to  
804 study. *BMC Biol* 9:46. doi:10.1186/1741-7007-9-46
- 805 Stephens GJ, Johnson-Kerner B, Bialek W, Ryu WS. 2008. Dimensionality and  
806 dynamics in the behavior of *C. elegans*. *PLoS Comput Biol* 4:e1000028.  
807 doi:10.1371/journal.pcbi.1000028
- 808 Swierczek NA, Giles AC, Rankin CH, Kerr RA. 2011. High-throughput behavioral  
809 analysis in *C. elegans*. *Nat Methods* 8:592–8. doi:10.1038/nmeth.1625
- 810 Tononi G, Sporns O, Edelman GM. 1999. Measures of degeneracy and redundancy in  
811 biological networks. *Proc Natl Acad Sci U S A* 96:3257–62.
- 812 Trojanowski NF, Padovan-Merhar O, Raizen DM, Fang-Yen C. 2014. Neural and  
813 genetic degeneracy underlies *Caenorhabditis elegans* feeding behavior. *J*  
814 *Neurophysiol* 112:951–61. doi:10.1152/jn.00150.2014
- 815 Tsukada Y, Yamao M, Naoki H, Shimowada T, Ohnishi N, Kuhara A, Ishii S, Mori I.  
816 2016. Reconstruction of Spatial Thermal Gradient Encoded in Thermosensory  
817 Neuron AFD in *Caenorhabditis elegans*. *J Neurosci* 36:2571–81.  
818 doi:10.1523/JNEUROSCI.2837-15.2016
- 819 Tsunozaki M, Chalasani SH, Bargmann CI. 2008. A Behavioral Switch: cGMP and  
820 PKC Signaling in Olfactory Neurons Reverses Odor Preference in *C. elegans*.  
821 *Neuron* 59:959–971. doi:10.1016/j.neuron.2008.07.038
- 822 Wagner A. 2005. Distributed robustness versus redundancy as causes of mutational  
823 robustness. *Bioessays* 27:176–88. doi:10.1002/bies.20170
- 824 Wang L, Sato H, Satoh Y, Tomioka M, Kunitomo H, Iino Y. 2017. A Gustatory Neural  
825 Circuit of *Caenorhabditis elegans* Generates Memory-Dependent Behaviors in  
826 Na<sup>+</sup> Chemotaxis. *J Neurosci* 37:2097–2111.  
827 doi:10.1523/JNEUROSCI.1774-16.2017
- 828 Wen Q, Po MD, Hulme E, Chen S, Liu X, Kwok SW, Gershow M, Leifer AM, Butler V,  
829 Fang-Yen C, Kawano T, Schafer WR, Whitesides G, Wyart M, Chklovskii DB,  
830 Zhen M, Samuel ADT. 2012. Proprioceptive coupling within motor neurons drives  
831 *C. elegans* forward locomotion. *Neuron* 76:750–61.  
832 doi:10.1016/j.neuron.2012.08.039
- 833 Whitacre J, Bender A. 2010. Degeneracy: A design principle for achieving robustness  
834 and evolvability. *J Theor Biol* 263:143–153. doi:10.1016/j.jtbi.2009.11.008
- 835 Whitacre JM. 2010. Degeneracy: a link between evolvability, robustness and  
836 complexity in biological systems. *Theor Biol Med Model* 7:6.  
837 doi:10.1186/1742-4682-7-6
- 838 Yamaguchi S, Naoki H, Ikeda M, Tsukada Y, Nakano S, Mori I, Ishii S. 2018.  
839 Identification of Animal Behavioral Strategies by Inverse Reinforcement Learning.

840 *PLoS Comput Biol* **14**:in press. doi:10.1101/129007  
841 Yan G, Vértés PE, Towlson EK, Chew YL, Walker DS, Schafer WR, Barabási AL.  
842 2017. Network control principles predict neuron function in the *Caenorhabditis*  
843 *elegans* connectome. *Nature* **550**:519–523. doi:10.1038/nature24056  
844  
845

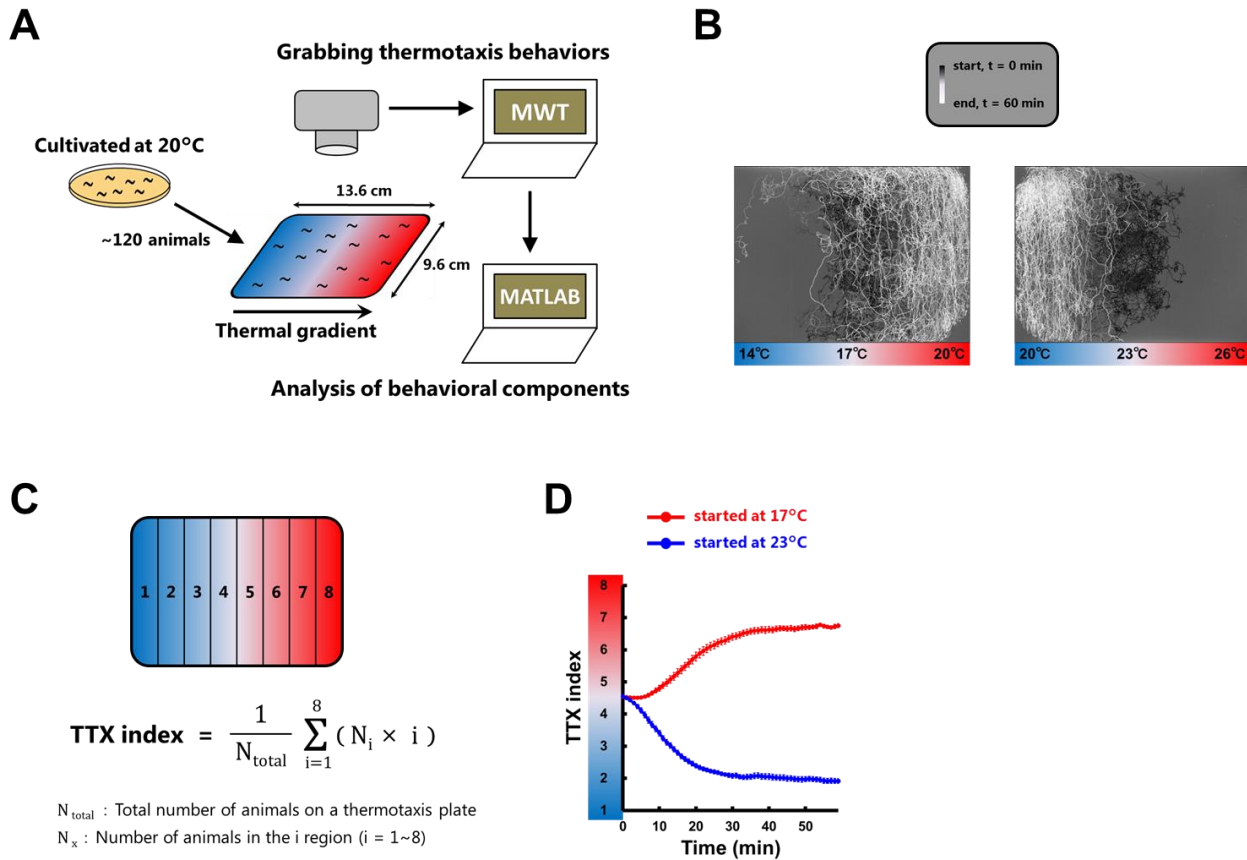

846

847 **Figure 1.** Thermotaxis behavior is accomplished within 30 minutes. (A) A Multi-Worm  
 848 Tracker (MWT) system for the extraction of behavioral components during thermotaxis  
 849 behavior. The thermotaxis assays were performed as previously reported (Ito et al.,  
 850 2006). The positions and postures of animals were captured by the MWT system and  
 851 then analyzed by custom-built MATLAB scripts. (B) Animals cultivated at 20°C were  
 852 placed on a TTX plate with a thermal gradient with 17°C (left panel) or 23°C (right  
 853 panel) at the center. Shown here are the representative trajectories of approximately 120  
 854 animals that were recorded by MWT. The time from the start of the assays are  
 855 represented in gray scale. (C) Formula for the TTX index. The number of animals in  
 856 each fraction (1–8) was scored in every one minute, and the TTX indices were  
 857 calculated using the equations as described. (D) The time course of TTX indices in the  
 858  $T < T_c$  condition (red line) and in the  $T > T_c$  condition (blue line). The migrations toward  
 859 the  $T_c$  were almost accomplished within 30 minutes. (n = 12).



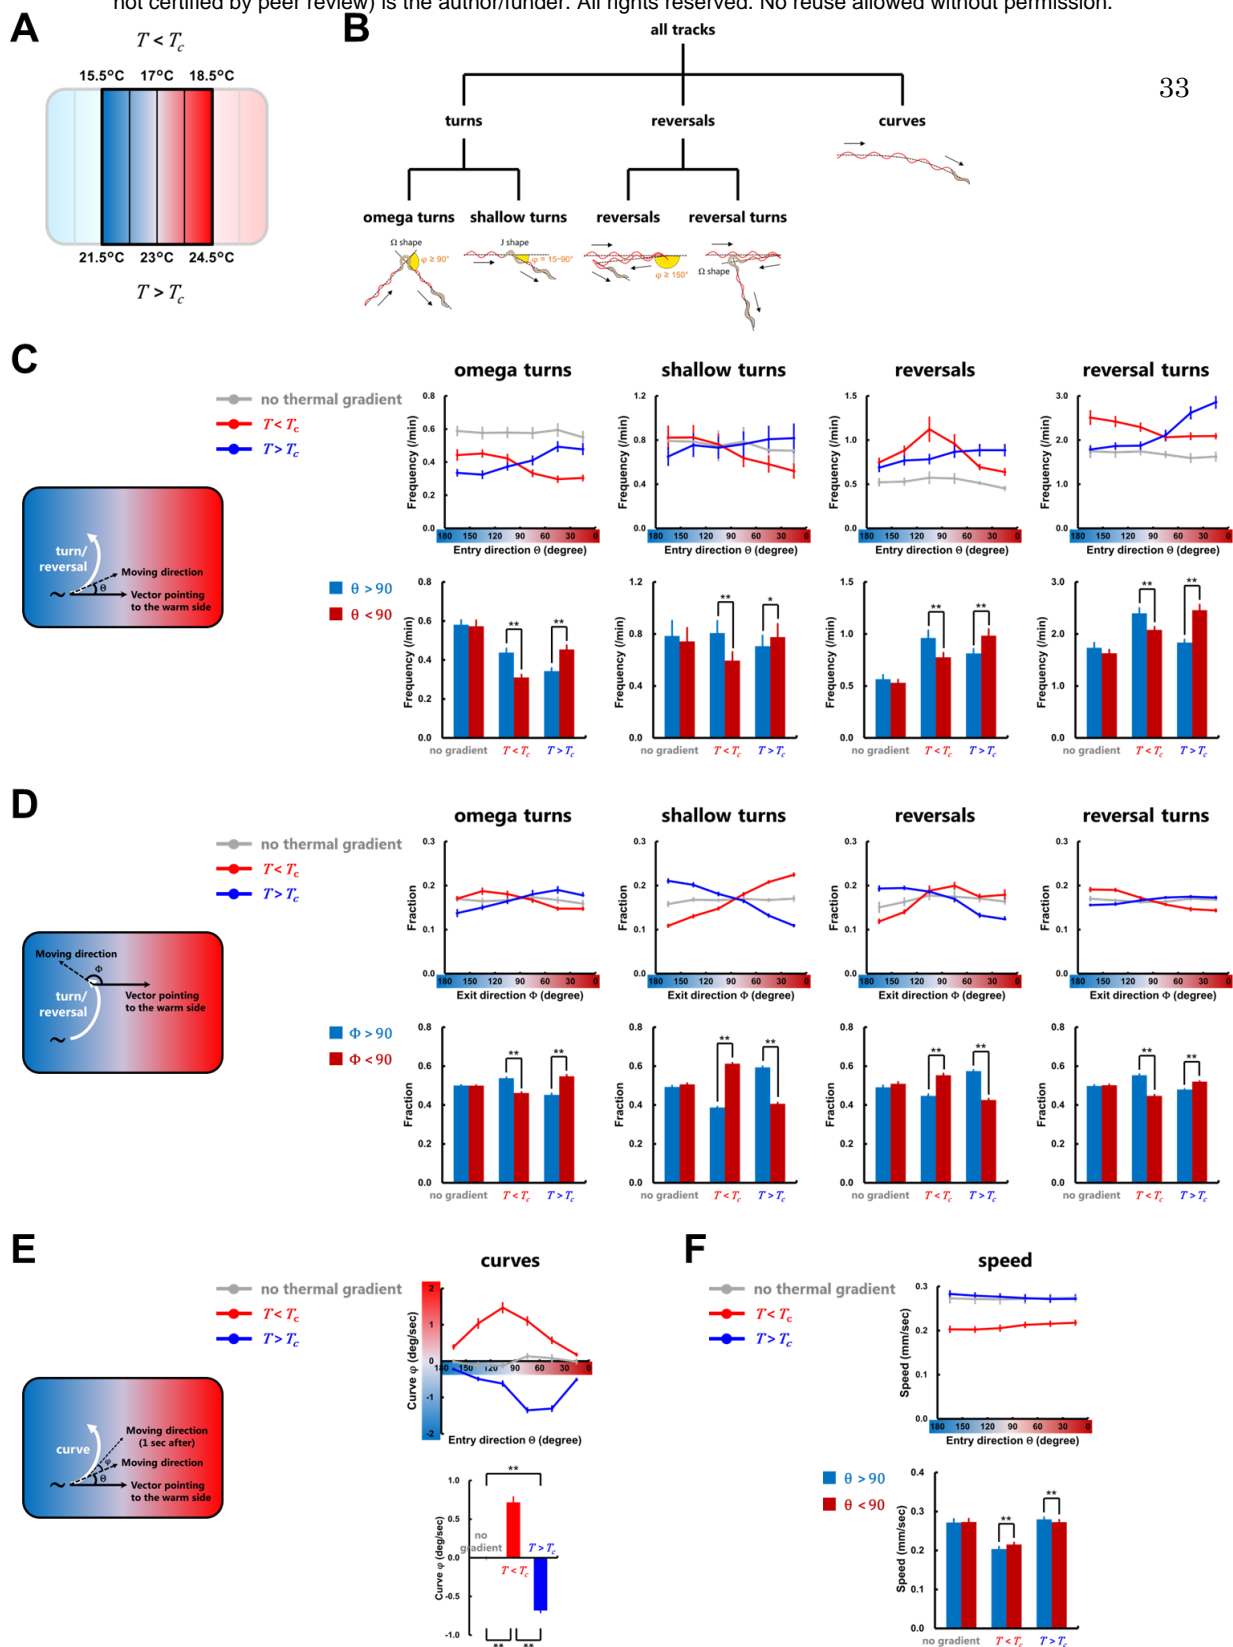

860

861 **Figure 2.** Behavioral components are flexibly regulated during thermotaxis. (A)

862 Temperature range within which the behavioral components were analyzed. Animals in

863 the center four fractions of the assay plate were analyzed (Figure 1B). (B) Classification

864 and definition of *C. elegans* behavioral components used in this study. Turns, reversals,

865 and curves were classified as previously proposed (Kim et al., 2011; Pierce-Shimomura  
866 et al., 1999; Salvador et al., 2014; Schild and Glauser, 2013). **(C)** Upper panels are  
867 frequency plots of the turns and the reversals representing the average as a function of  
868 the entry direction  $\theta$ , the angle between the moving direction before these behavioral  
869 events and the vector pointing to the warm side of the thermal gradient. Lower panels  
870 show comparisons of the frequency of each behavioral event. Deep red columns  
871 indicate the frequencies of the events while the animals are moving up the thermal  
872 gradient ( $\theta < 90$ ), and deep blue columns the frequencies while moving down the thermal  
873 gradient ( $\theta > 90$ ). **(D)** Upper panels are fraction plots of the exit direction ( $\Phi$ ) after the  
874 turns and the reversals.  $\Phi$  is the angle between the moving direction after these  
875 behavioral events and the vector pointing to the warm side of the thermal gradient.  
876 Lower panels show comparisons of the fraction of the exit direction of each behavioral  
877 event. Deep red columns indicate the exit directions of the events toward the warm side  
878 of the thermal gradient ( $\Phi < 90$ ), and deep blue columns the exit directions toward the  
879 cold side ( $\Phi > 90$ ). **(E)** The biases ( $\varphi$ ) of curves were calculated for each frame and  
880 averaged as a function of the moving direction  $\theta$ .  $\varphi$  is the angle between the past  
881 moving direction (1 sec before) and the current moving direction.  $\varphi$  is defined as  
882 positive if biased toward higher temperature and negative if biased toward lower  
883 temperature. **(F)** Upper panel is speed plots representing the averages as a function of  
884 the entry direction  $\theta$ . Lower panel shows comparisons of the speeds. Deep red columns  
885 indicate the speeds while the animals are moving up the thermal gradient ( $\theta < 90$ ), and  
886 deep blue columns the speeds while moving down the thermal gradient ( $\theta > 90$ ). In  
887 **(C–F)**, gray lines correspond to experiments without the thermal gradient (20°C  
888 constant), red lines correspond to experiments in the  $T < T_c$  condition, and blue lines  
889 correspond to experiments in the  $T > T_c$  condition.  $n \geq 6$ . Error bars indicate SEM. Paired  
890 Student's *t*-test (**C**, **D**, **F**); one-way ANOVA followed by a Tukey–Kramer post hoc  
891 multiple comparisons test (**E**). \*\* $p < 0.01$ , \* $p < 0.05$ .

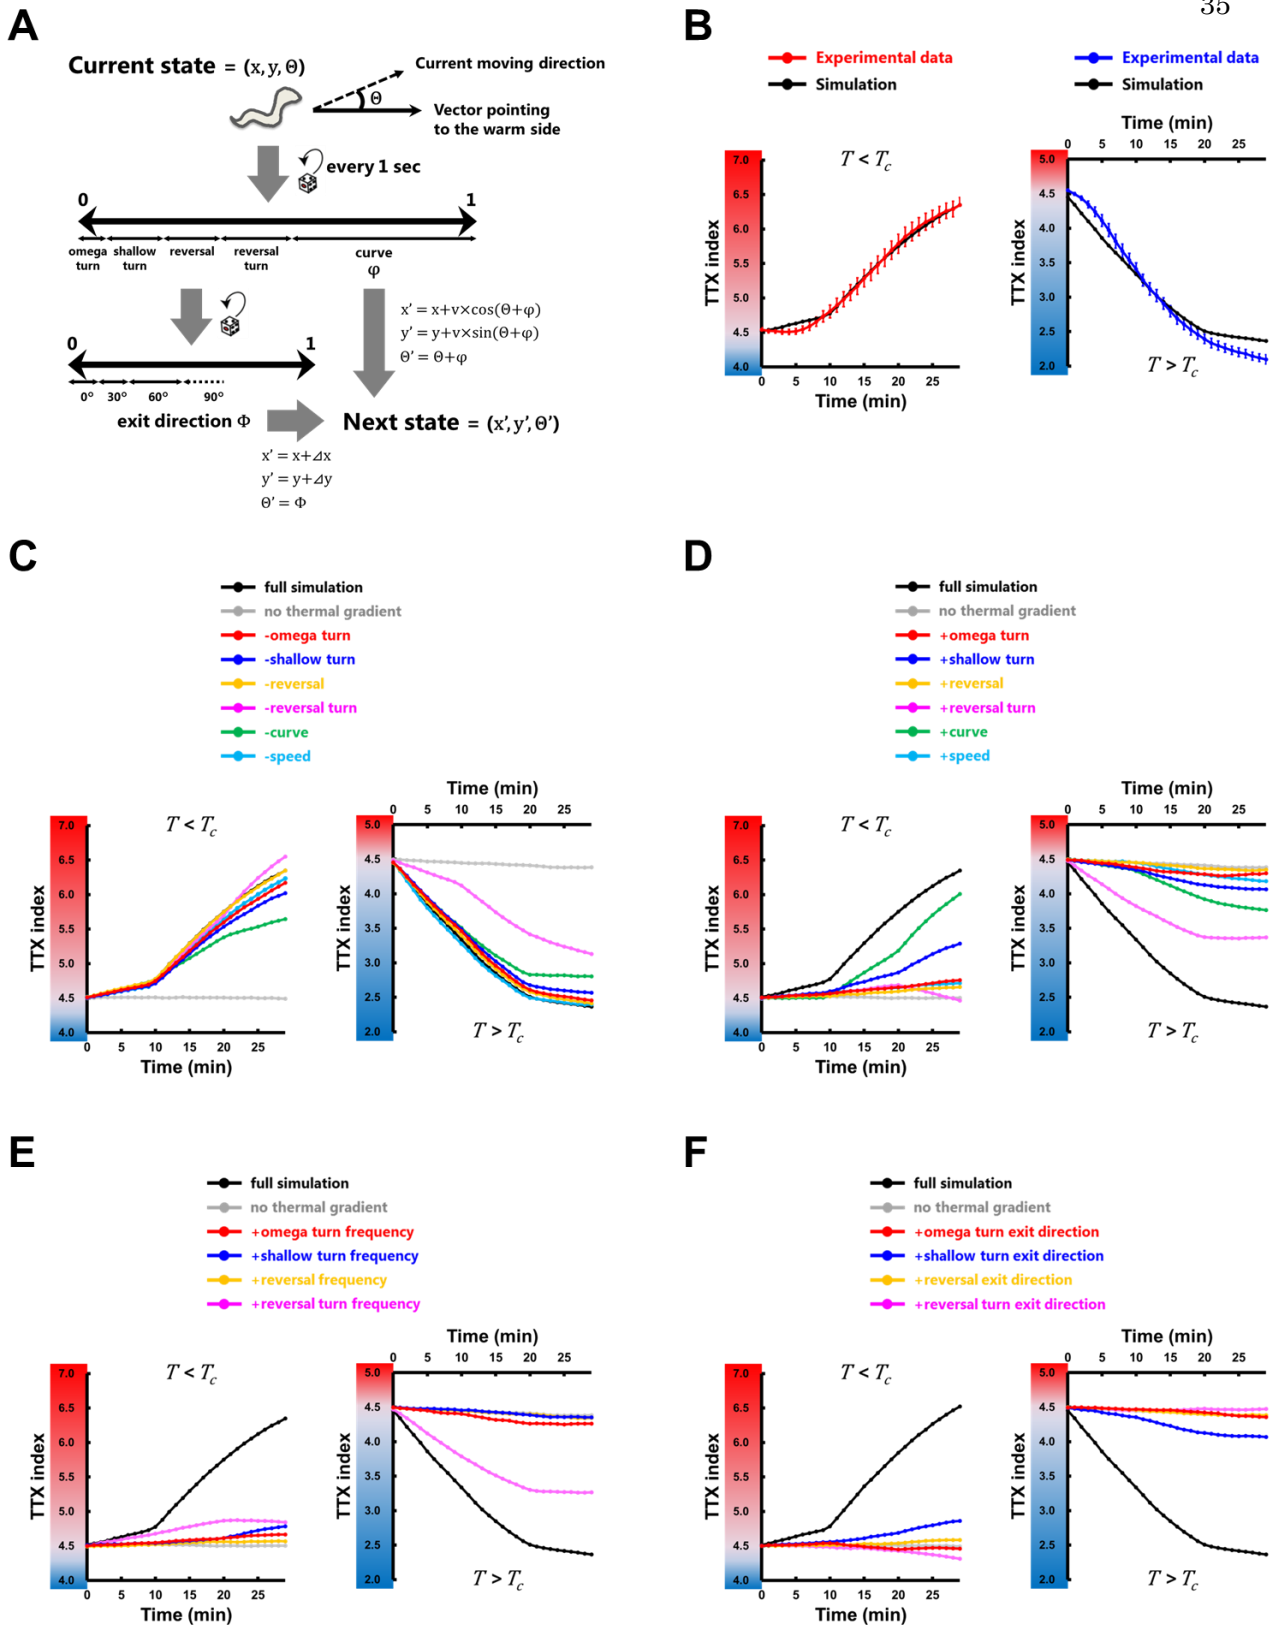

892

893 **Figure 3.** Behavioral components are employed differently depending on different  
 894 temperature environment relative to the  $T_c$ . (A) Schematic structure of the thermotaxis  
 895 behavior simulation. Animal's state was defined by its position  $(x, y)$  and moving

896 direction relative to the vector pointing to the warm side ( $\theta$ ). We updated the states of  
897 the animal every second according to the experimentally observed data: the frequencies  
898 and the exit directions ( $\Phi$ ) of the turns and the reversals, the biases of the curves ( $\varphi$ ),  
899 and the speeds ( $v$ ) (Figures 2C–2F, S1A–S1E), all of which were applied as functions of  
900  $\theta$  and  $T$  versus  $T_c$ . The displacements during the individual turns ( $\Delta x$ ,  $\Delta y$ ) were also  
901 employed when updating the states of the animals. **(B)** The time course of TTX indices  
902 in the simulations (black lines) and that obtained from experimental data (colored lines).  
903 In the simulations, we iterated assays for 100 times, each with 100 animals, and the  
904 TTX indices were averaged within the assays. **(C)** The time course of TTX indices in  
905 the simulations in which the data of the individual behavioral component determined by  
906 the experiment with the thermal gradient was replaced with the data of the  
907 corresponding component without the gradient. **(D–F)** The time course of TTX indices  
908 in the simulations in which the data of the individual behavioral component without the  
909 thermal gradient was replaced with the data of the corresponding component with the  
910 gradient. **(D)** Data of both frequencies and exit directions were replaced. **(E)** Data of  
911 frequencies alone was replaced. **(F)** Data of exit directions alone was replaced. In **(C–F)**,  
912 black lines correspond to the simulation in which all the data of wild-type animals  
913 determined by the experiment with the thermal gradient were used, and gray lines  
914 correspond to the simulation in which all the data of wild-type animals without the  
915 gradient were used. The other colored lines correspond to the simulation with the  
916 replacements of the individual behavioral component: the omega turn (red lines), the  
917 shallow turn (blue lines), the reversal (yellow lines), the reversal turn (magenta lines),  
918 the curve (green lines), and the speed (light blue lines).

**A**

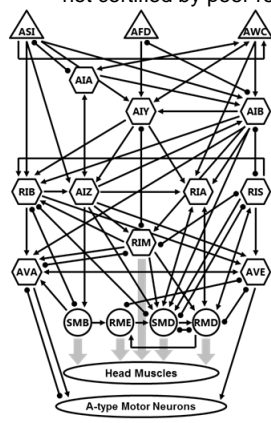

**B**

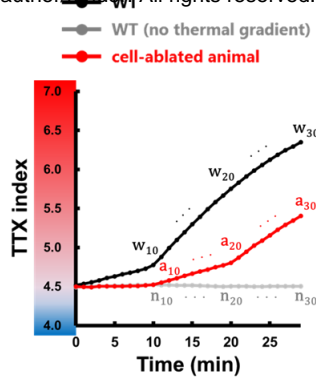

37

$$\text{Migration index} = M \times \frac{\sum_{i=1}^{30} (a_i - n_i)}{\sum_{i=1}^{30} (w_i - n_i)}$$

$$M = \begin{cases} 1 & (T < T_c) \\ -1 & (T > T_c) \end{cases}$$

**C curves**

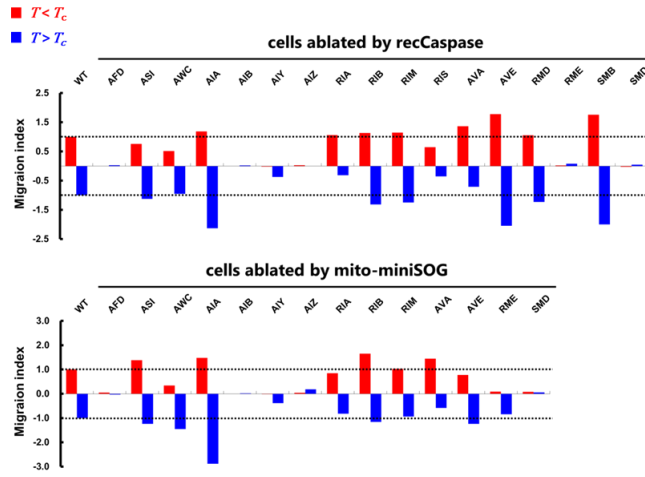

**D**

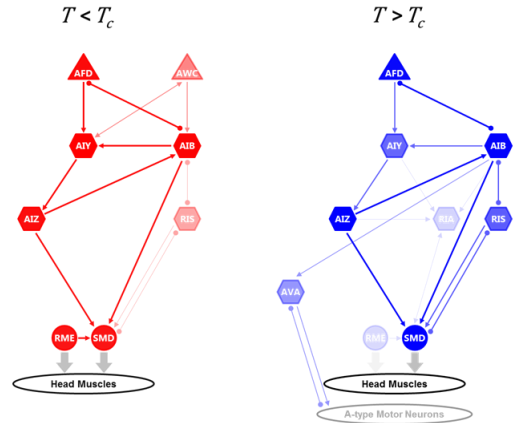

**E shallow turns**

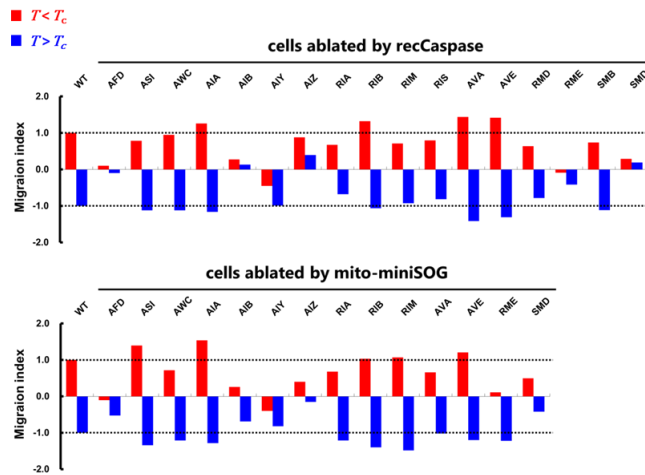

**F**

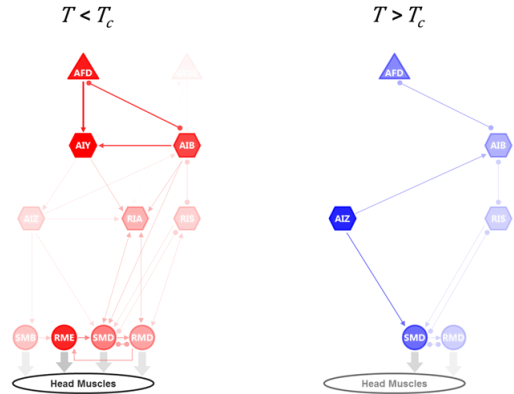

**G speeds**

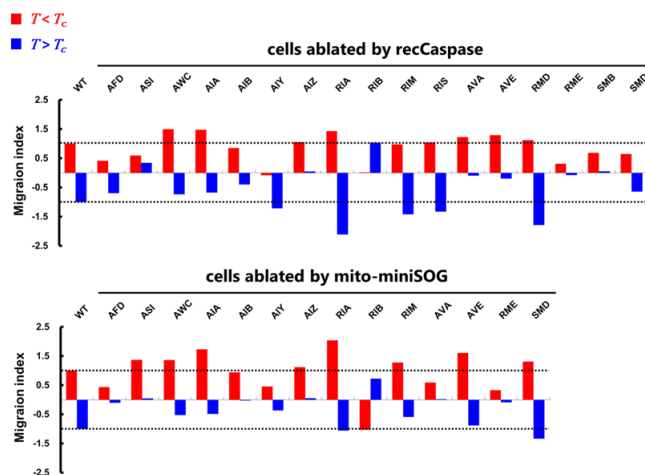

**H**

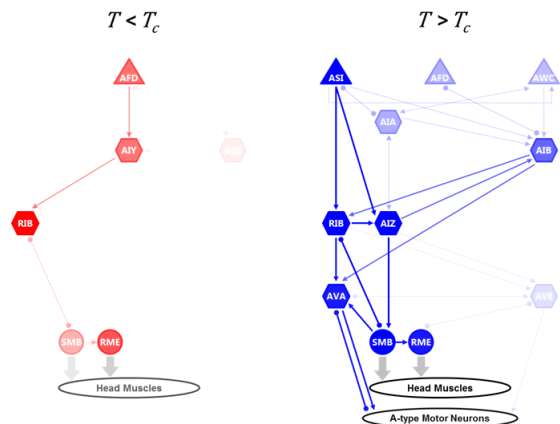

920 **Figure 4.** Overlapping but distinct neural circuits are recruited for the  
921 context-dependent regulation of the curves, the omega Turns, and the shallow turns. **(A)**  
922 Candidate neurons for cell-specific ablations, including thermosensory neurons  
923 (triangles), interneurons (hexagons), and head motor neurons (circles). Black thin  
924 arrows indicate chemical synapses, black undirected lines with round endings gap  
925 junctions, and gray thick arrows neuromuscular junctions. **(B)** Formula for the  
926 migration index. TTX indices from the simulation of cell-ablated animals ( $a_i$ , red line)  
927 were compared with the indices from the simulation of wild-type (WT) animals without  
928 the thermal gradient ( $n_i$ , grey line) in every minute, and the difference between them  
929 was summed up within 1–30 min. The value was normalized with the summation of the  
930 difference between the TTX indices from the simulation of WT with the thermal  
931 gradient ( $w_i$ , black line) and the indices of WT without the gradient. **(C, E, G)**  
932 Migration indices of the curves, the shallow turns, and the speeds after cell-specific  
933 ablations by expressing reconstituted caspases (upper panels) and mito-miniSOG (lower  
934 panels). The indices in the  $T < T_c$  condition are represented as red columns. The indices  
935 in the  $T > T_c$  condition are represented as blue columns. Dashed lines show the indices of  
936 wild type animals ( $\pm 1$ ). ( $n \geq 5$ ). **(D, F, H)** Predicted neural circuits for regulating the  
937 curves, the shallow turns, and the speeds in the  $T < T_c$  condition (red) and in the  $T > T_c$   
938 condition (blue). The thickness and color strength of each neuron represent the  
939 functional importance of the neuron predicted from the analysis and were determined as  
940 follows: For each neuron, the differences between the migration index of the wild-type  
941 animals and the index of the cell-ablated animals expressing reconstituted caspases or  
942 mito-miniSOG were calculated. The smaller difference from the two ablation strategies  
943 is used to determine the color strength, where the color strength of each neuron is  
944 proportional to this value. The color strength of each line is identical to the strength of  
945 the color of one of the two connected neurons with lower strength, and the thickness of  
946 each line is proportional to this color strength.

## A reversal turns

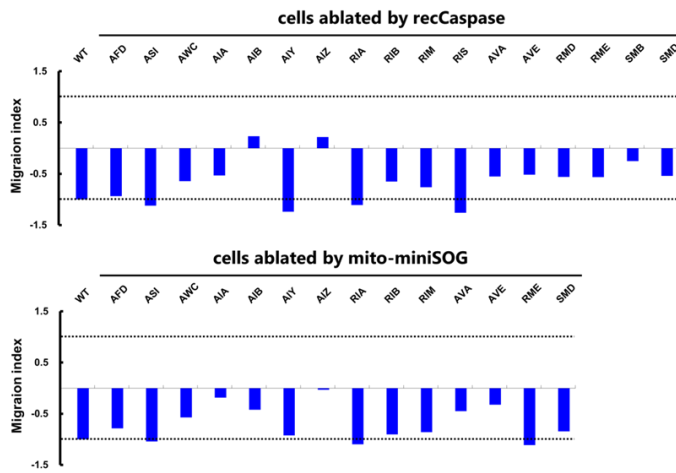

## B

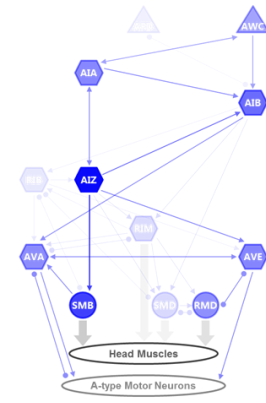

## C

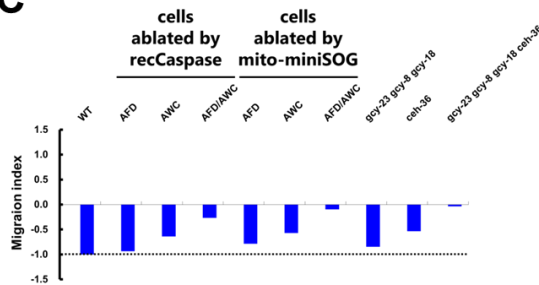

## D

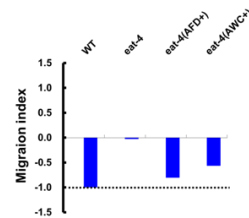

947

948 **Figure 5.** Redundancy between AFD and AWC sensory neurons enables robust  
 949 regulation of the reversal turns. (A) Migration indices of the reversal turns after  
 950 cell-specific ablations by expressing reconstituted caspases (upper panel) and  
 951 mito-miniSOG (lower panel). ( $n \geq 5$ ). (B) Predicted neural circuits for regulating the  
 952 reversal turns. (C) Migration indices of the reversal turns of wild-type animals,  
 953 AFD-deficient animals, AWC-deficient animals, and AFD-AWC double deficient  
 954 animals. ( $n \geq 5$ ). (D) Migration indices of the reversal turns of wild-type animals, *eat-4*  
 955 mutants, *eat-4* mutants with an expression of *eat-4* cDNA in AFD, and *eat-4* mutants  
 956 with an expression of *eat-4* cDNA in AWC. ( $n \geq 6$ ). In (A, C, D), dashed lines show the  
 957 indices of wild type animals (-1).

## A omega turns

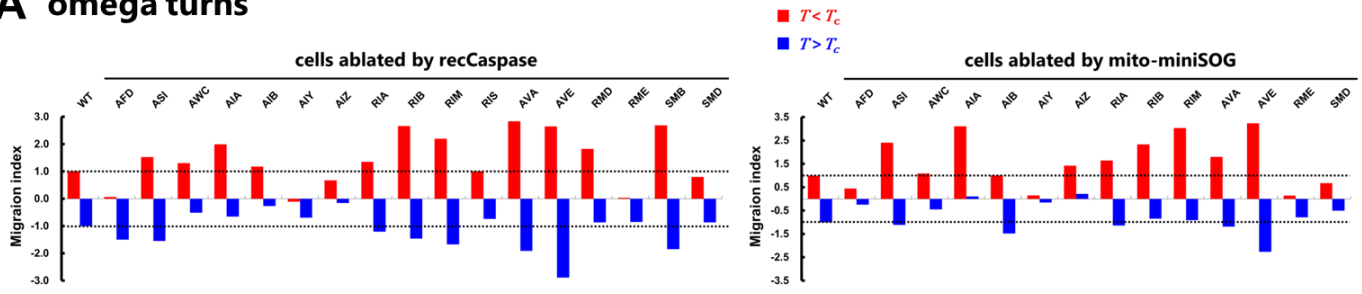

## B

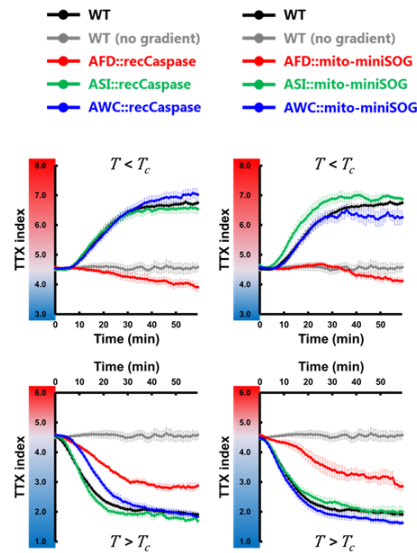

## C

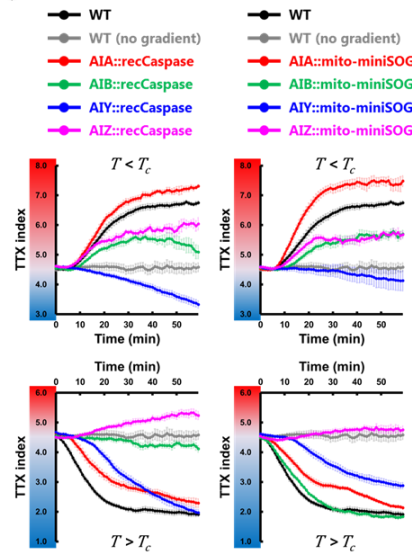

## D

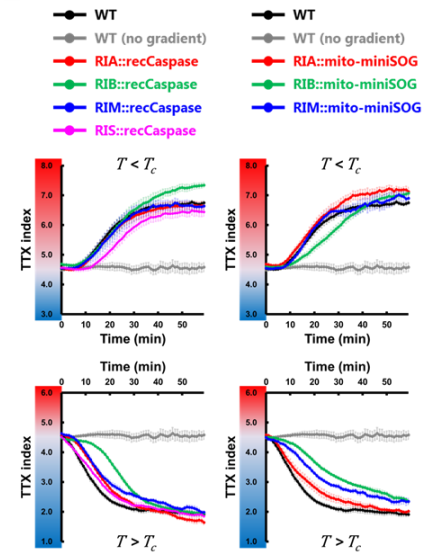

## E

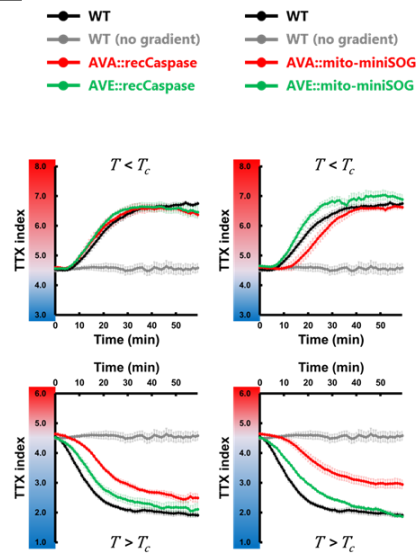

## F

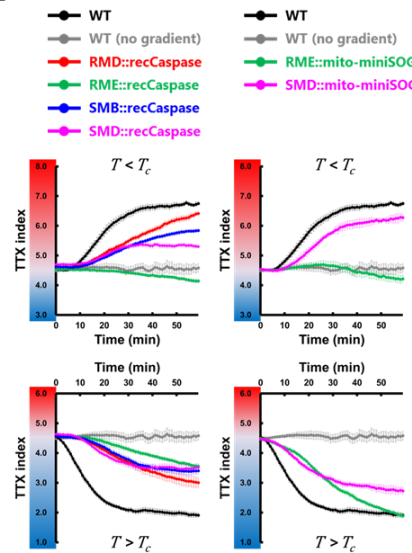

## G

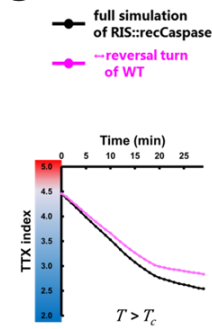

## H

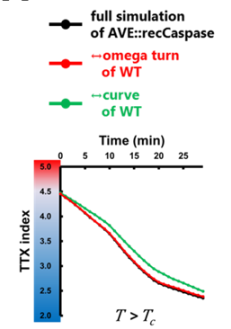

958

959 **Figure 6.** The migration toward the  $T_c$  is robustly executed under the deficiencies in the  
 960 neural circuits. (A) Migration indices of the omega turns after cell-specific ablations by  
 961 expressing reconstituted caspases (left panel) and mito-miniSOG (right panel). The



962 indices in the  $T < T_c$  condition are represented as red columns. The indices in the  $T > T_c$   
963 condition are represented as blue columns. Dashed lines show the indices of wild type  
964 animals. ( $n \geq 5$ ). **(B–F)** The time course of TTX indices in the  $T < T_c$  condition (upper  
965 panels) and in the  $T > T_c$  condition (lower panels) under the deficiency of thermosensory  
966 neurons **(B)**, amphid interneurons **(C)**, ring interneurons **(D)**, ventral cord interneurons  
967 **(E)**, and ring motor neurons **(F)**.  $n \geq 5$ . Error bars indicate SEM.  
968 **(G)** The time course of TTX indices in the simulations of RIS-ablated animals (black  
969 line) and in the simulations in which the data of the reversal turns of RIS-ablated  
970 animals was replaced with the data of wild-type animals (magenta line). **(H)** The time  
971 course of TTX indices in the simulations of AVE-ablated animals (black line) and in the  
972 simulations in which the data of the omega turns and the curves of AVE-ablated animals  
973 was replaced with the data of wild-type animals (red line and green line, respectively).

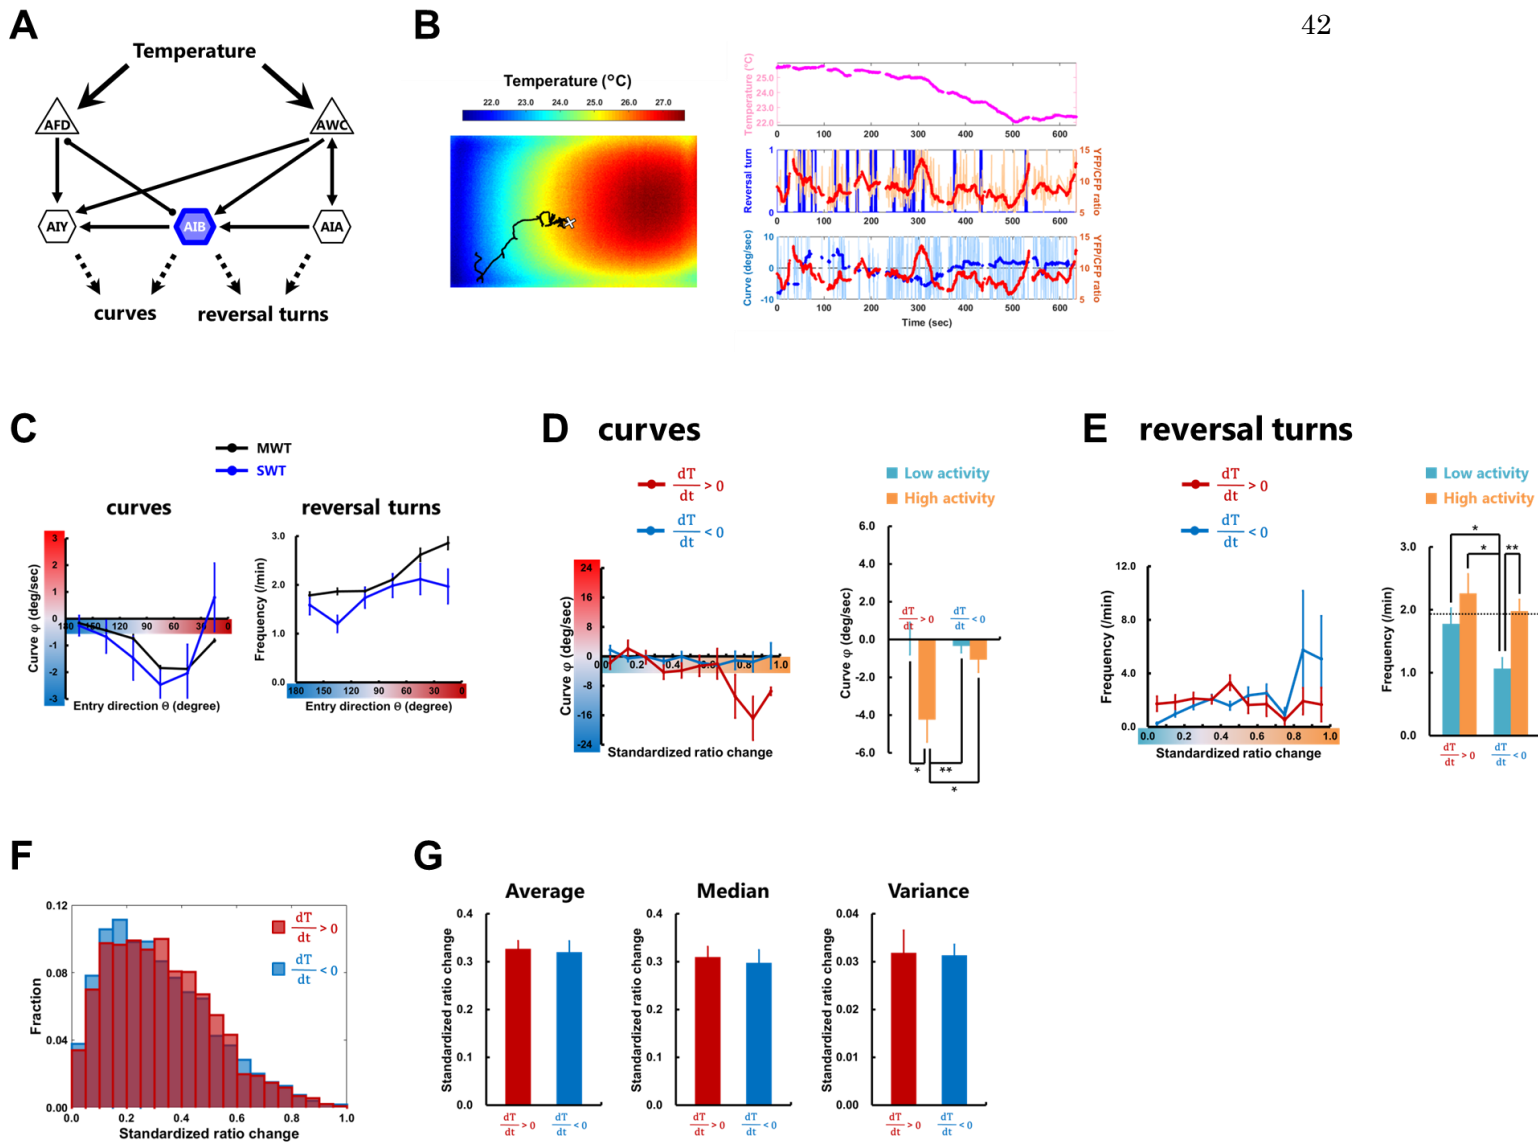

974

975 **Figure 7.** AIB neuron regulates the curves and the reversal turns in a context-dependent  
 976 manner. (A) Representative sensory neurons and first-layer interneurons, which regulate  
 977 the reversal turns or the curves. Thin arrows indicate chemical synapses and an  
 978 undirected line with round endings indicates gap junction. (B) Representative  
 979 thermography image (left panel) taken together with calibrating temperature  
 980 measurements using a thermocouple sensor. Projection of a trajectory (black line) shows  
 981 how the animal searches the thermal environment. The white + marks the starting point  
 982 when recording starts. From this trajectory, the time course of the temperature changes  
 983 is obtained (light magenta line in right upper panel), and the reversal turn (blue line in  
 984 right middle panel) and the curve (light blue line in right lower panel) are extracted. The  
 985 temperature after the median filter (magenta line in right upper panel) and the averaged

986 curve (blue line in right lower panel) are also shown. The time course of the YFP/CFP  
987 ratio of the AIB neuron (light red line in right middle panel) was calculated from YFP  
988 and CFP fluorescences, and the ratio after the median filter is also shown (red line in  
989 right middle and lower panel). **(C)** Plots of the biases of curves (left panel) and the  
990 reversal turn frequency (right panel) representing the averages as a function of the entry  
991 direction  $\theta$ . The data obtained on the multi-worm tracker (black lines,  $n \geq 12$ ) and on  
992 the single-worm tracker (colored lines,  $n \geq 14$ ) are shown. **(D and E)** Plots of the biases  
993 of curves **(D)** and the reversal turn frequency **(E)** representing the averages as a function  
994 of the standardized ratio change (see Materials and methods) of AIB (upper panels).  
995 Standardized ratio change was divided into “High activity” or “Low activity” according  
996 to the median value (Figure 7G), and the curving bias and the reversal turn frequency  
997 were averaged within High (orange columns in lower panels) or Low (cyan columns in  
998 lower panels) activity while the animals are moving up or down the thermal gradient.  
999 Dashed line in right lower panel shows the average of the reversal turn frequency on the  
1000 constant temperature at 23°C obtained in MWT. **(F)** Fractional histogram showing the  
1001 standardized ratio change of AIB while the animals are moving up the thermal gradient  
1002 (deep red) and those while moving down the thermal gradient (deep blue). **(G)**  
1003 Comparison of the average (left panel), the median (middle panel), and the variance  
1004 (right panel) of the standardized ratio change of AIB between while the animals are  
1005 moving up the thermal gradient (deep red columns) and those while moving down the  
1006 thermal gradient (deep blue columns).  $n \geq 14$ . Error bars indicate SEM. Friedman rank  
1007 sum test together with repetitive Wilcoxon signed rank tests **(D)**; pairwise test for  
1008 multiple comparisons using Holm’s method **(E)**; paired Student’s *t*-test **(G)**. \*\* $p < 0.01$ ,  
1009 \* $p < 0.05$ .

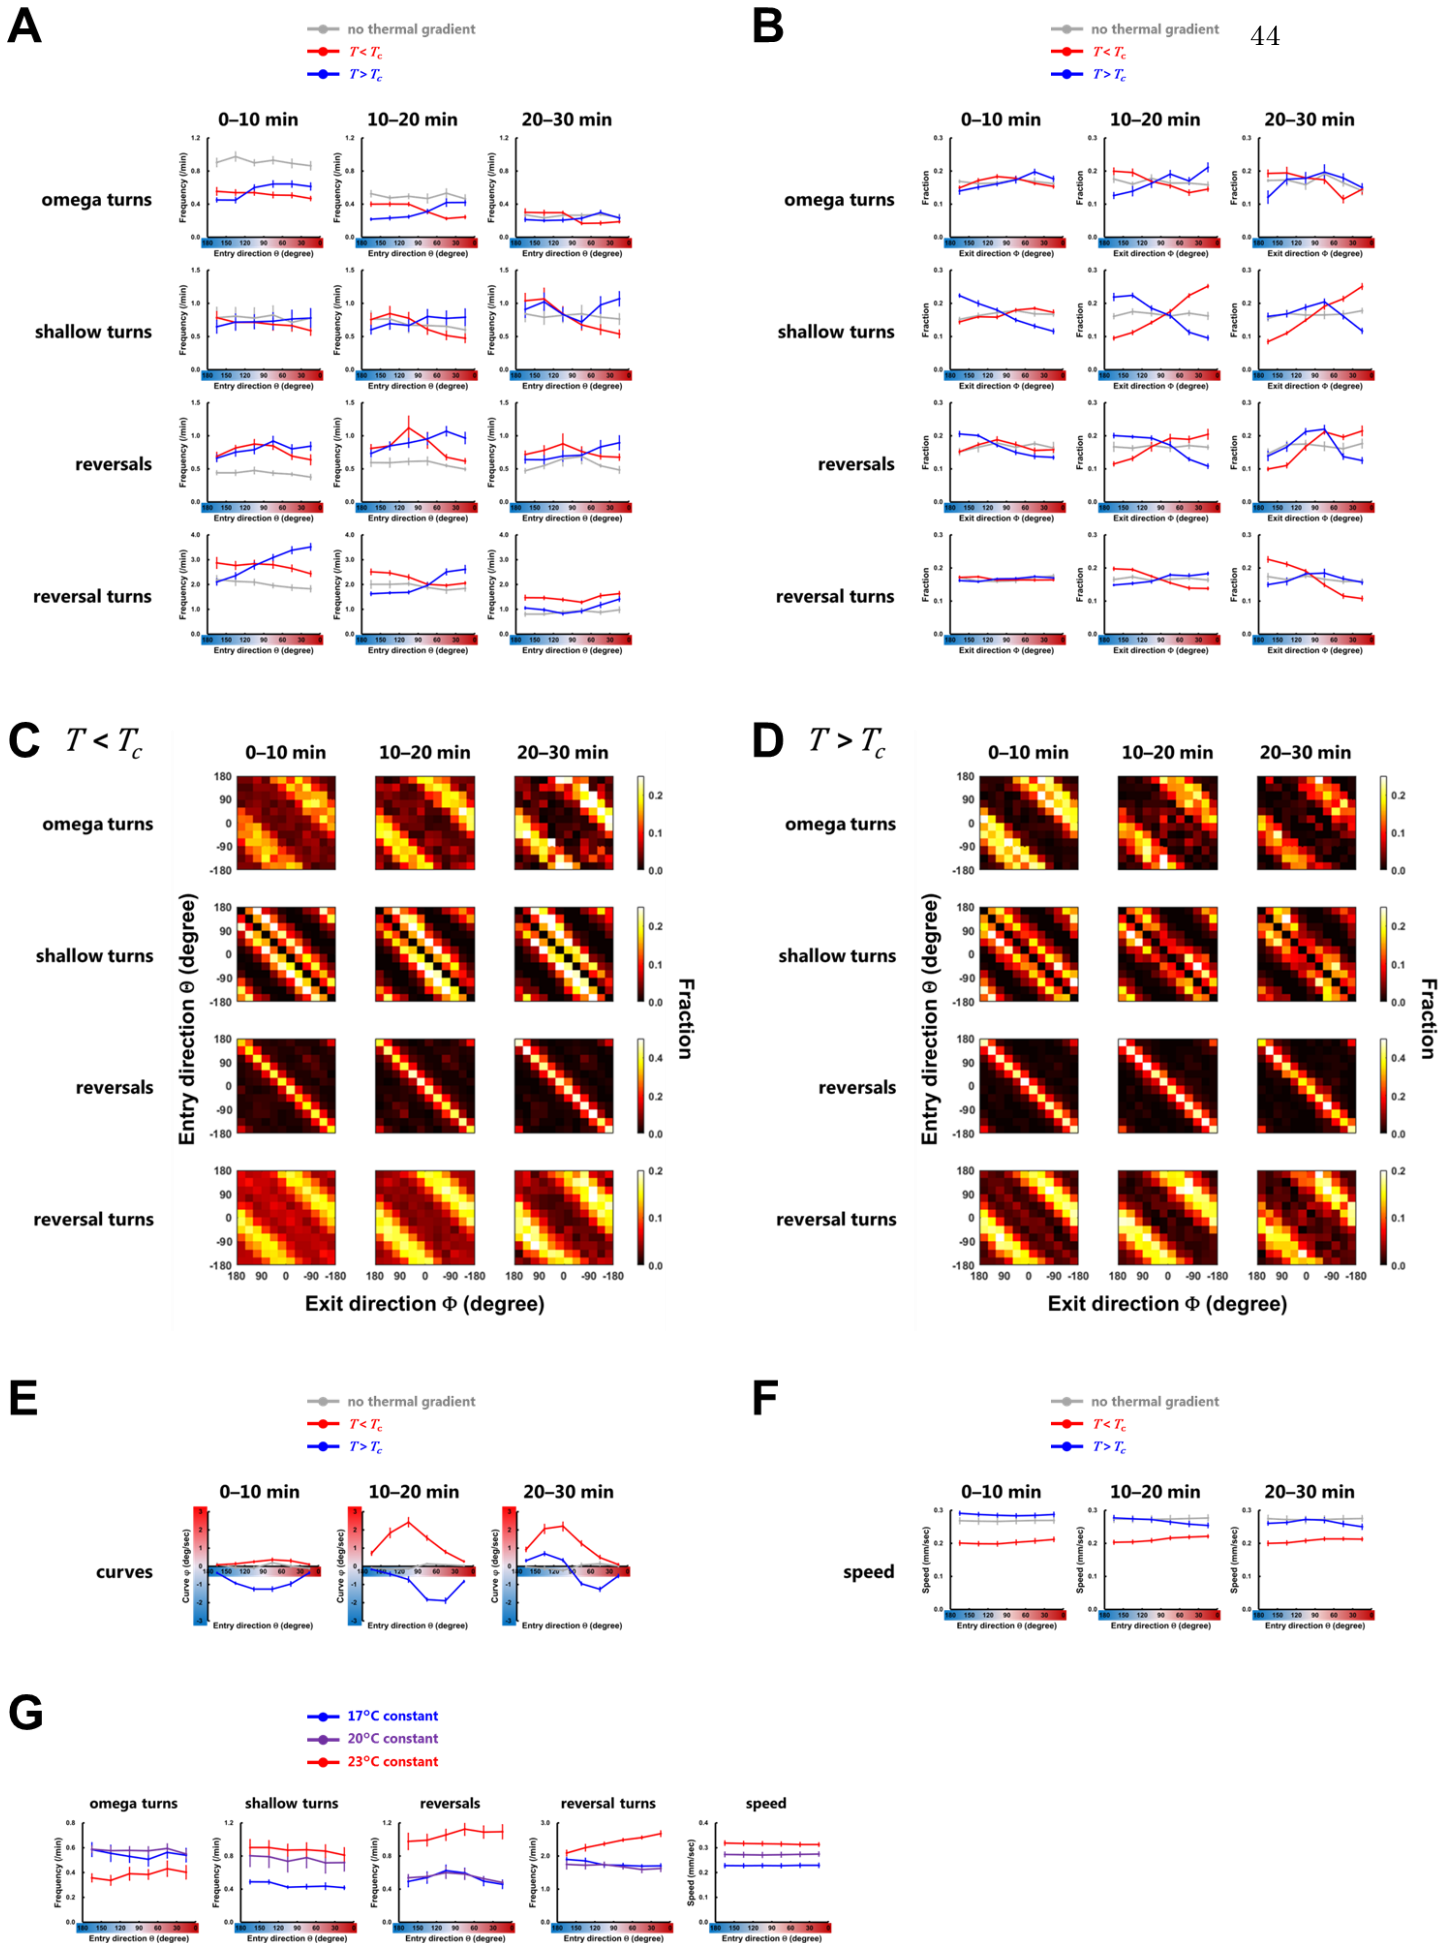

1011 **Figure S1.** Time course of the regulations of the behavioral components in wild-type  
1012 animals. **(A, B, E, F)** Regulations of the behavioral components on the constant  
1013 temperature (gray lines), in the  $T < T_c$  condition (red lines), and in the  $T > T_c$  condition  
1014 (blue lines). **(A)** Frequency plots of the turns and the reversals representing the averages  
1015 as a function of the entry direction  $\theta$ . **(B)** Fraction plots of the exit direction  $\Phi$  after the  
1016 turns and the reversals. **(E)** Plots of the biases  $\varphi$  of curves representing the averages as a  
1017 function of the entry direction  $\theta$ . **(F)** Speed plots representing the averages as a function  
1018 of the entry direction  $\theta$ . **(C and D)** Heat map of fractions of the exit direction  $\Phi$  as  
1019 functions of the entry direction  $\theta$  in the  $T < T_c$  condition **(C)** and in the  $T > T_c$  condition  
1020 **(D)**. Both  $\theta$  and  $\Phi$  are signed to distinguish whether the exit angle is directed toward the  
1021 upper half or the lower half of assay plates. **(G)** Frequency plots of the turns and the  
1022 reversals and speed plots representing the averages as a function of the entry direction  $\theta$   
1023 on the constant temperature at 17°C (blue lines), 20°C (purple lines), and 23°C (red  
1024 lines). In **(A–G)**, the averages over 0–10 min (left columns), over 10–20 min (middle  
1025 columns), and over 20–30 min (right columns) are shown.

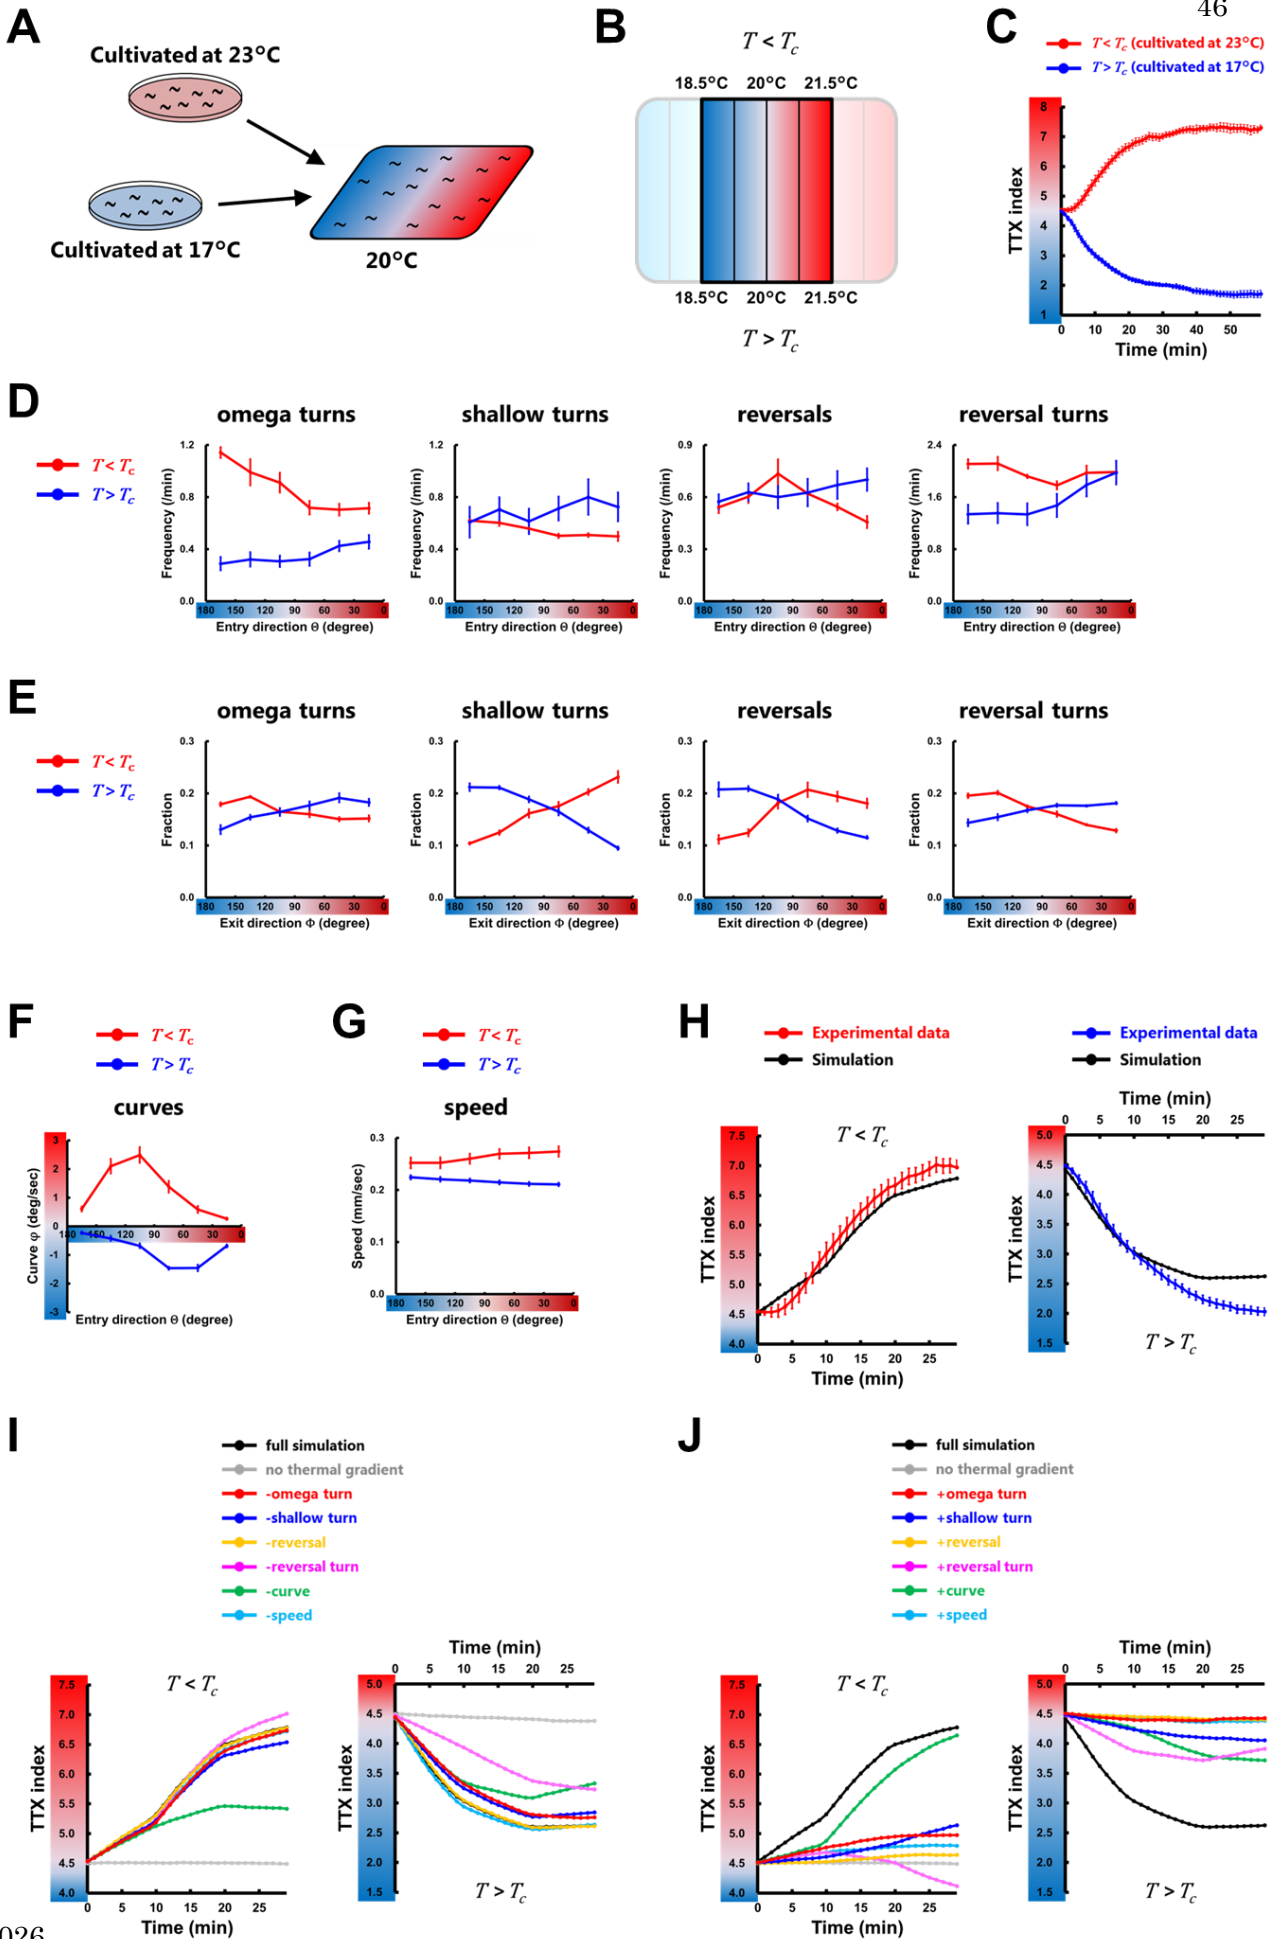

1027 **Figure S2.** Behavioral components are employed differently depending on the  $T_c$ . **(A)**  
1028 Animals cultivated at 17°C or 23°C were placed on a thermal gradient with 20°C at the  
1029 center. The plate was maintained with a linear thermal gradient of approximately  
1030 0.45 °C/cm. **(B)** Temperature range within which the behavioral components were  
1031 analyzed. **(C)** The time course of TTX indices in the  $T < T_c$  condition (red line) and in  
1032 the  $T > T_c$  condition (blue line). (n = 6). **(D–G)** Regulations of the behavioral  
1033 components in the  $T < T_c$  condition (red lines) and in the  $T > T_c$  condition (blue lines). **(D)**  
1034 Frequency plots of the turns and the reversals representing the averages as a function of  
1035 the entry direction  $\theta$ . **(E)** Fraction plots of the exit direction  $\Phi$  after the turns and the  
1036 reversals. **(F)** Plots of the biases  $\varphi$  of curves representing the averages as a function of  
1037 the entry direction  $\theta$ . **(G)** Speed plots representing the averages as a function of the  
1038 entry direction  $\theta$ . **(H)** The time course of TTX indices in the simulations (black lines)  
1039 and that obtained from experimental data (colored lines). **(I and J)** black lines  
1040 correspond to the simulation in which all the data of wild-type animals determined by  
1041 the experiment with the thermal gradient were used, and gray lines correspond to the  
1042 simulation in which all the data of wild-type animals without the gradient were used.  
1043 The other colored lines correspond to the simulation with the replacements of the  
1044 individual behavioral component: the omega turn (red lines), the shallow turn (blue  
1045 lines), the reversal (yellow lines), the reversal turn (magenta lines), the curve (green  
1046 lines), and the speed (light blue lines).

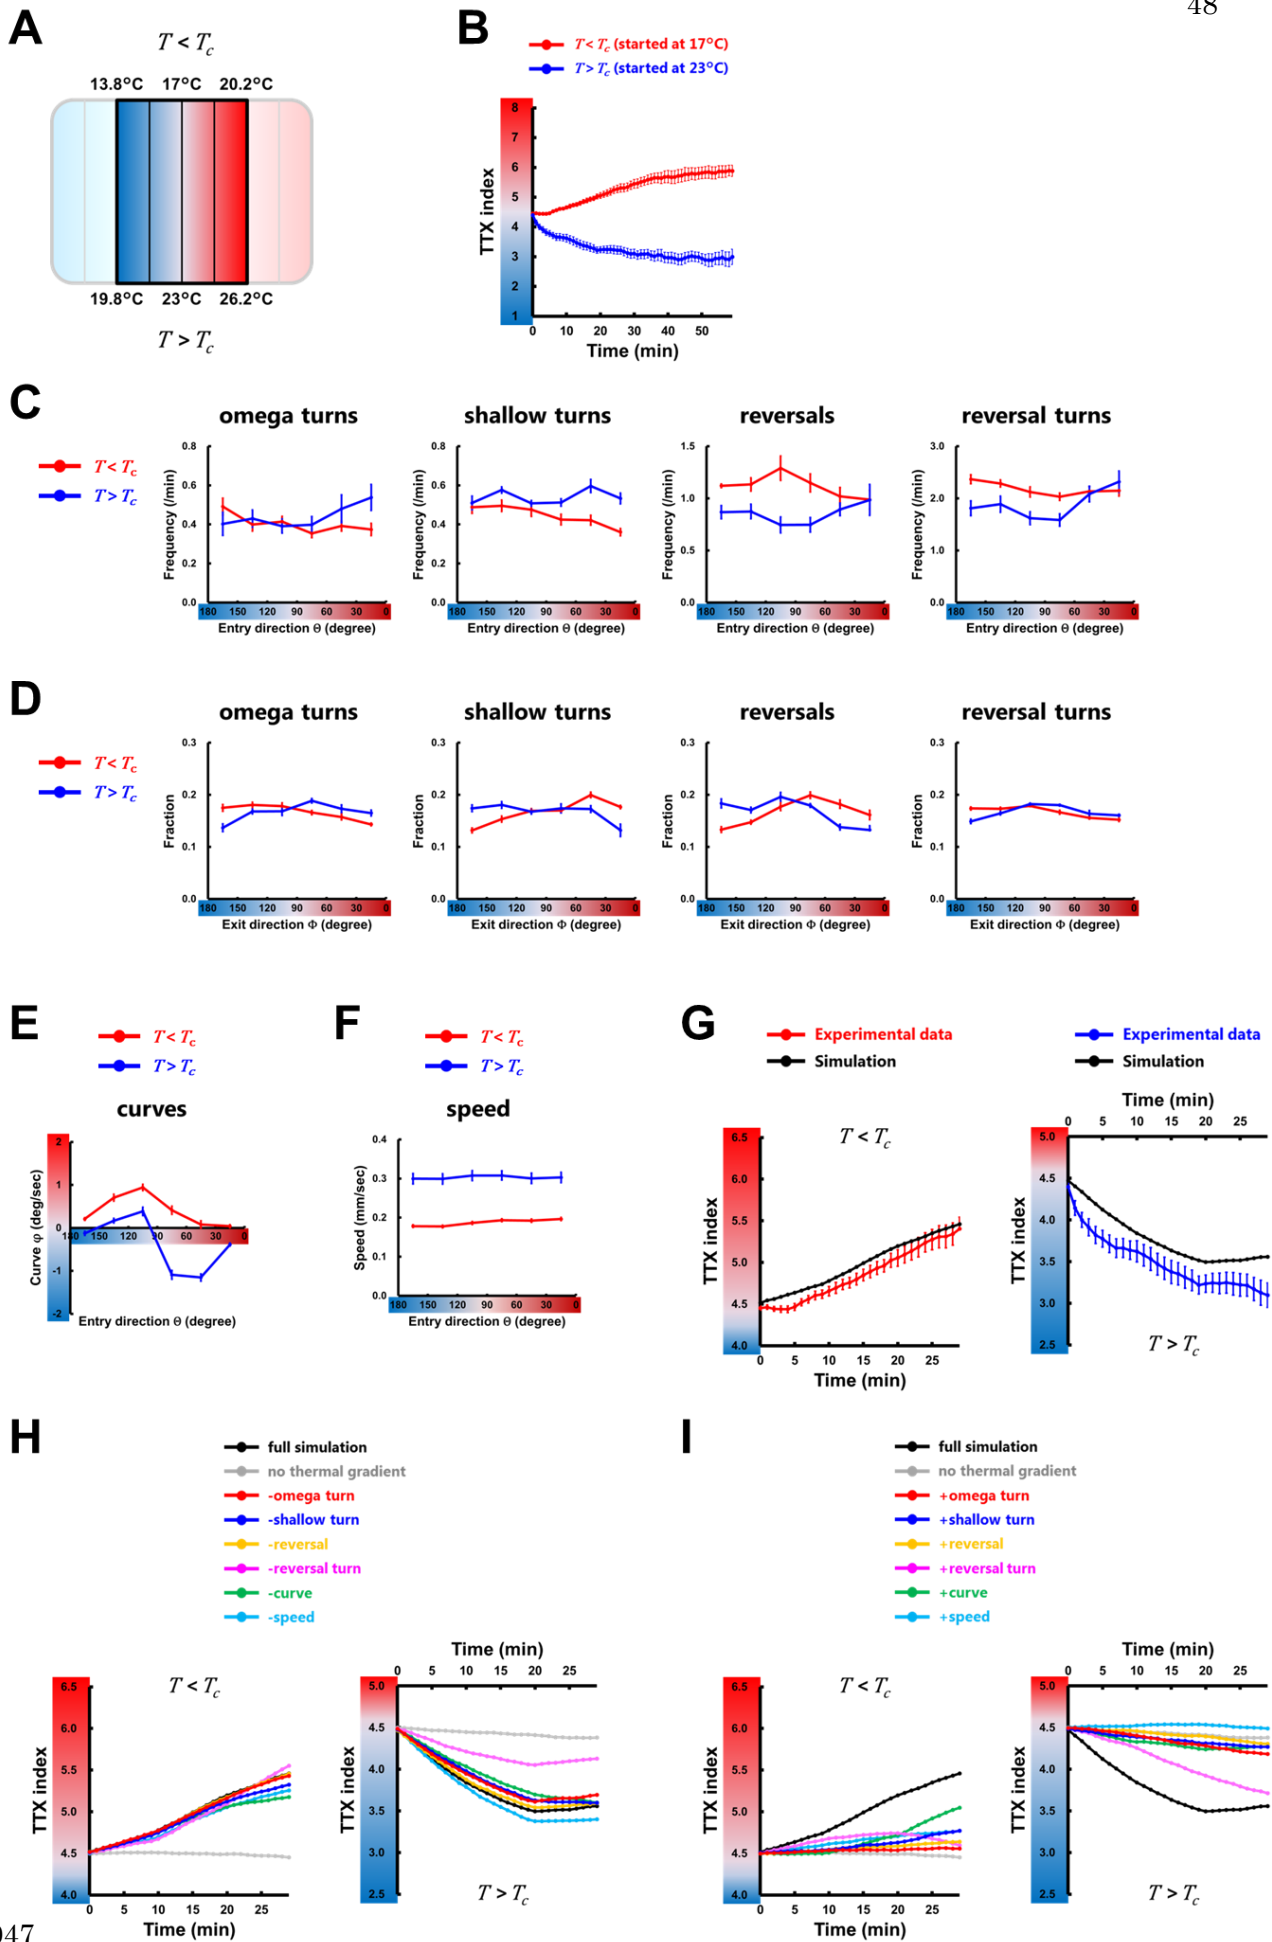



1048 **Figure S3.** Employments of the behavioral components are slightly affected by the  
1049 steepness of thermal gradient. **(A)** Temperature range within which the behavioral  
1050 components were analyzed. The plate was maintained with a linear thermal gradient of  
1051 approximately 0.95 °C/cm. **(B)** The time course of TTX indices in the  $T < T_c$  condition  
1052 (red line) and in the  $T > T_c$  condition (blue line). ( $n \geq 6$ ). **(C–F)** Regulations of the  
1053 behavioral components in the  $T < T_c$  condition (red lines) and in the  $T > T_c$  condition (blue  
1054 lines). **(C)** Frequency plots of the turns and the reversals representing the averages as a  
1055 function of the entry direction  $\theta$ . **(D)** Fraction plots of the exit direction  $\Phi$  after the turns  
1056 and the reversals. **(E)** Plots of the biases  $\varphi$  of curves representing the averages as a  
1057 function of the entry direction  $\theta$ . **(F)** Speed plots representing the averages as a function  
1058 of the entry direction  $\theta$ . **(G)** The time course of TTX indices in the simulations (black  
1059 lines) and that obtained from experimental data (colored lines). **(H and I)** black lines  
1060 correspond to the simulation in which all the data of wild-type animals determined by  
1061 the experiment with the thermal gradient were used, and gray lines correspond to the  
1062 simulation in which all the data of wild-type animals without the gradient were used.  
1063 The other colored lines correspond to the simulation with the replacements of the  
1064 individual behavioral component: the omega turn (red lines), the shallow turn (blue  
1065 lines), the reversal (yellow lines), the reversal turn (magenta lines), the curve (green  
1066 lines), and the speed (light blue lines).

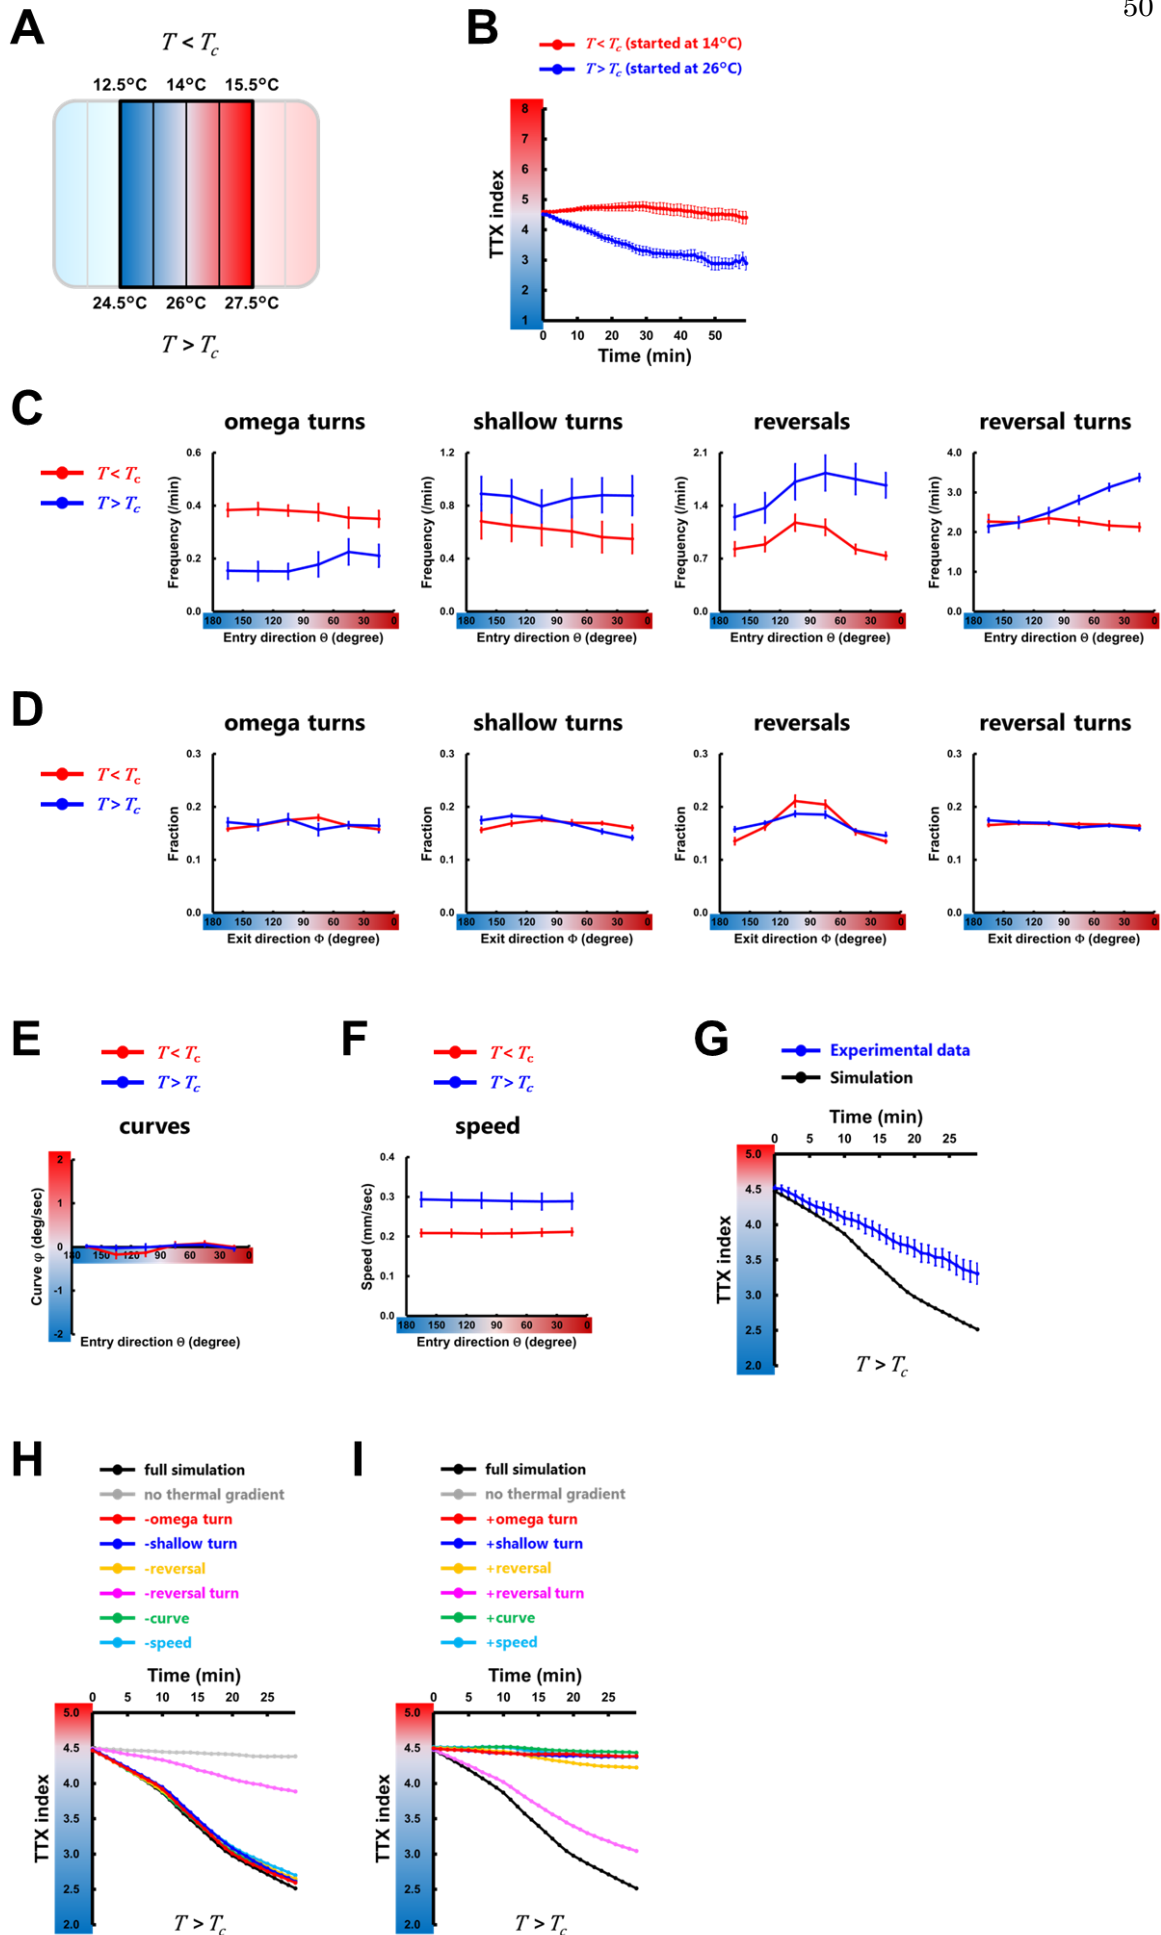

1068 **Figure S4.** Behavioral components except for the reversal turns are not employed in the  
1069 region distant from the  $T_c$ . **(A)** Temperature range within which the behavioral  
1070 components were analyzed. The plate was maintained with a linear thermal gradient of  
1071 approximately 0.45 °C/cm. **(B)** The time course of TTX indices in the  $T < T_c$  condition  
1072 (red line) and in the  $T > T_c$  condition (blue line). ( $n \geq 6$ ). **(C–F)** Regulations of the  
1073 behavioral components in the  $T < T_c$  condition (red lines) and in the  $T > T_c$  condition (blue  
1074 lines). **(C)** Frequency plots of the turns and the reversals representing the averages as a  
1075 function of the entry direction  $\theta$ . **(D)** Fraction plots of the exit direction  $\Phi$  after the turns  
1076 and the reversals. **(E)** Plots of the biases  $\varphi$  of curves representing the averages as a  
1077 function of the entry direction  $\theta$ . **(F)** Speed plots representing the averages as a function  
1078 of the entry direction  $\theta$ . **(G)** The time course of TTX indices in the simulations (black  
1079 line) and that obtained from experimental data (blue line). **(H and I)** black lines  
1080 correspond to the simulation in which all the data of wild-type animals determined by  
1081 the experiment with the thermal gradient were used, and gray lines correspond to the  
1082 simulation in which all the data of wild-type animals without the gradient were used.  
1083 The other colored lines correspond to the simulation with the replacements of the  
1084 individual behavioral component: the omega turn (red lines), the shallow turn (blue  
1085 lines), the reversal (yellow lines), the reversal turn (magenta lines), the curve (green  
1086 lines), and the speed (light blue lines).

## A curves

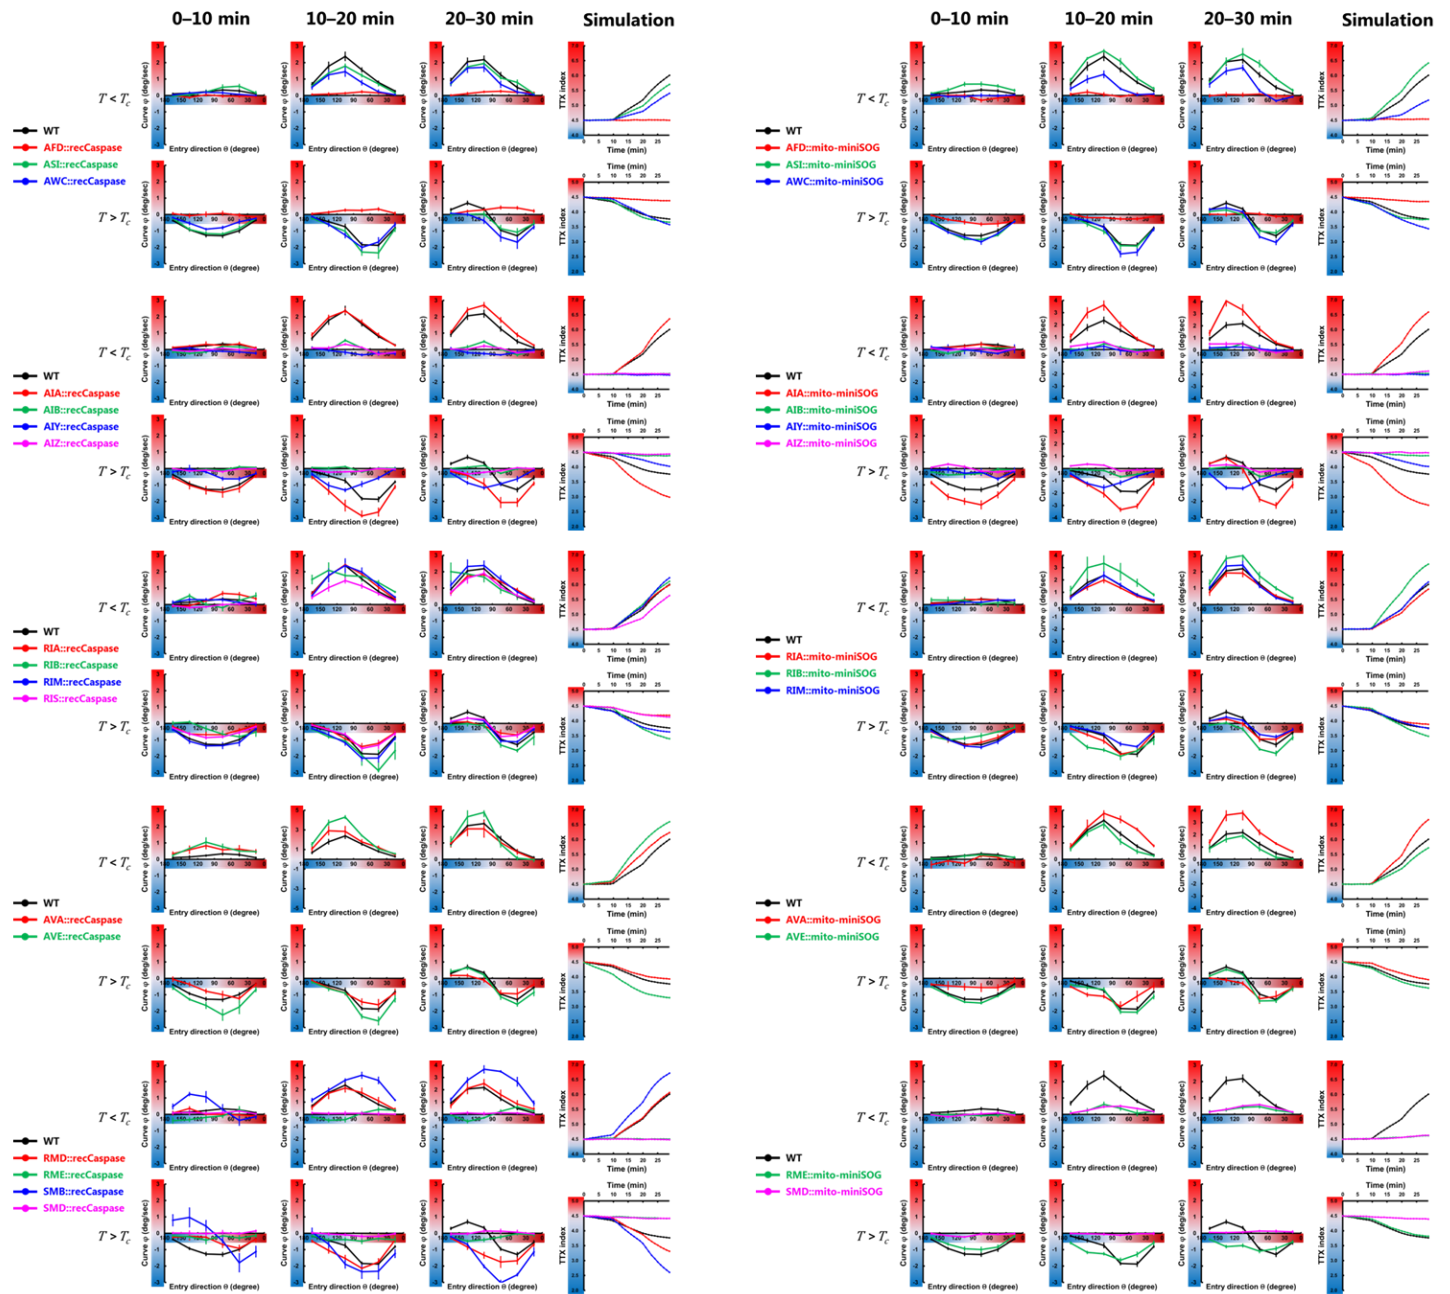

## B

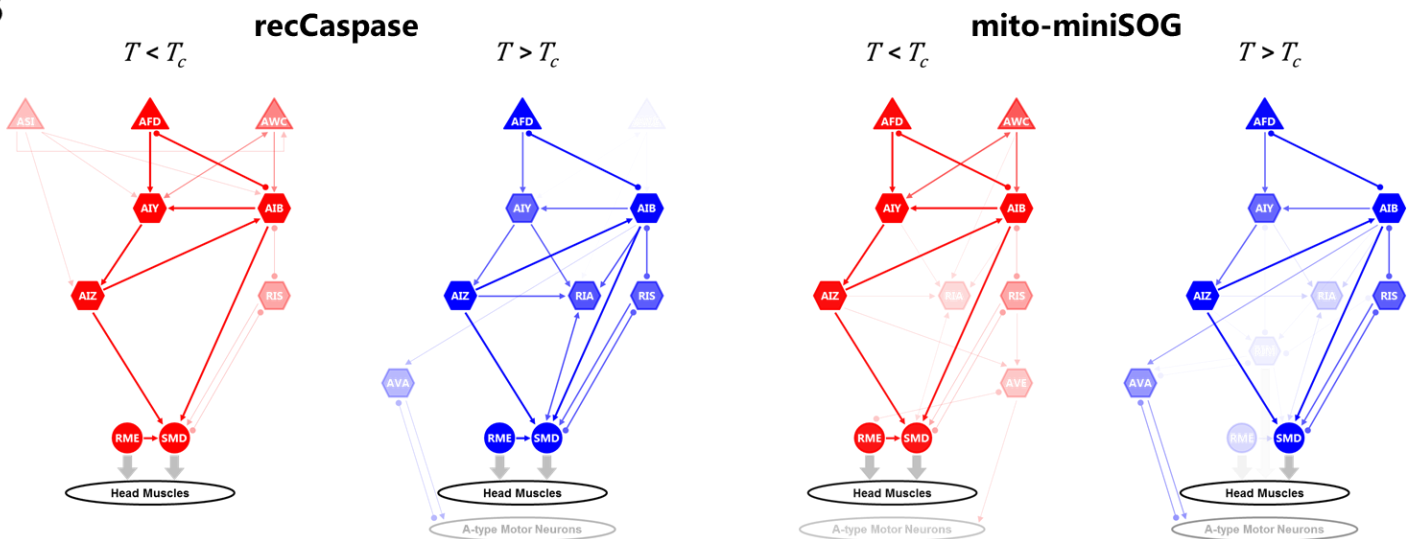

## C shallow turns

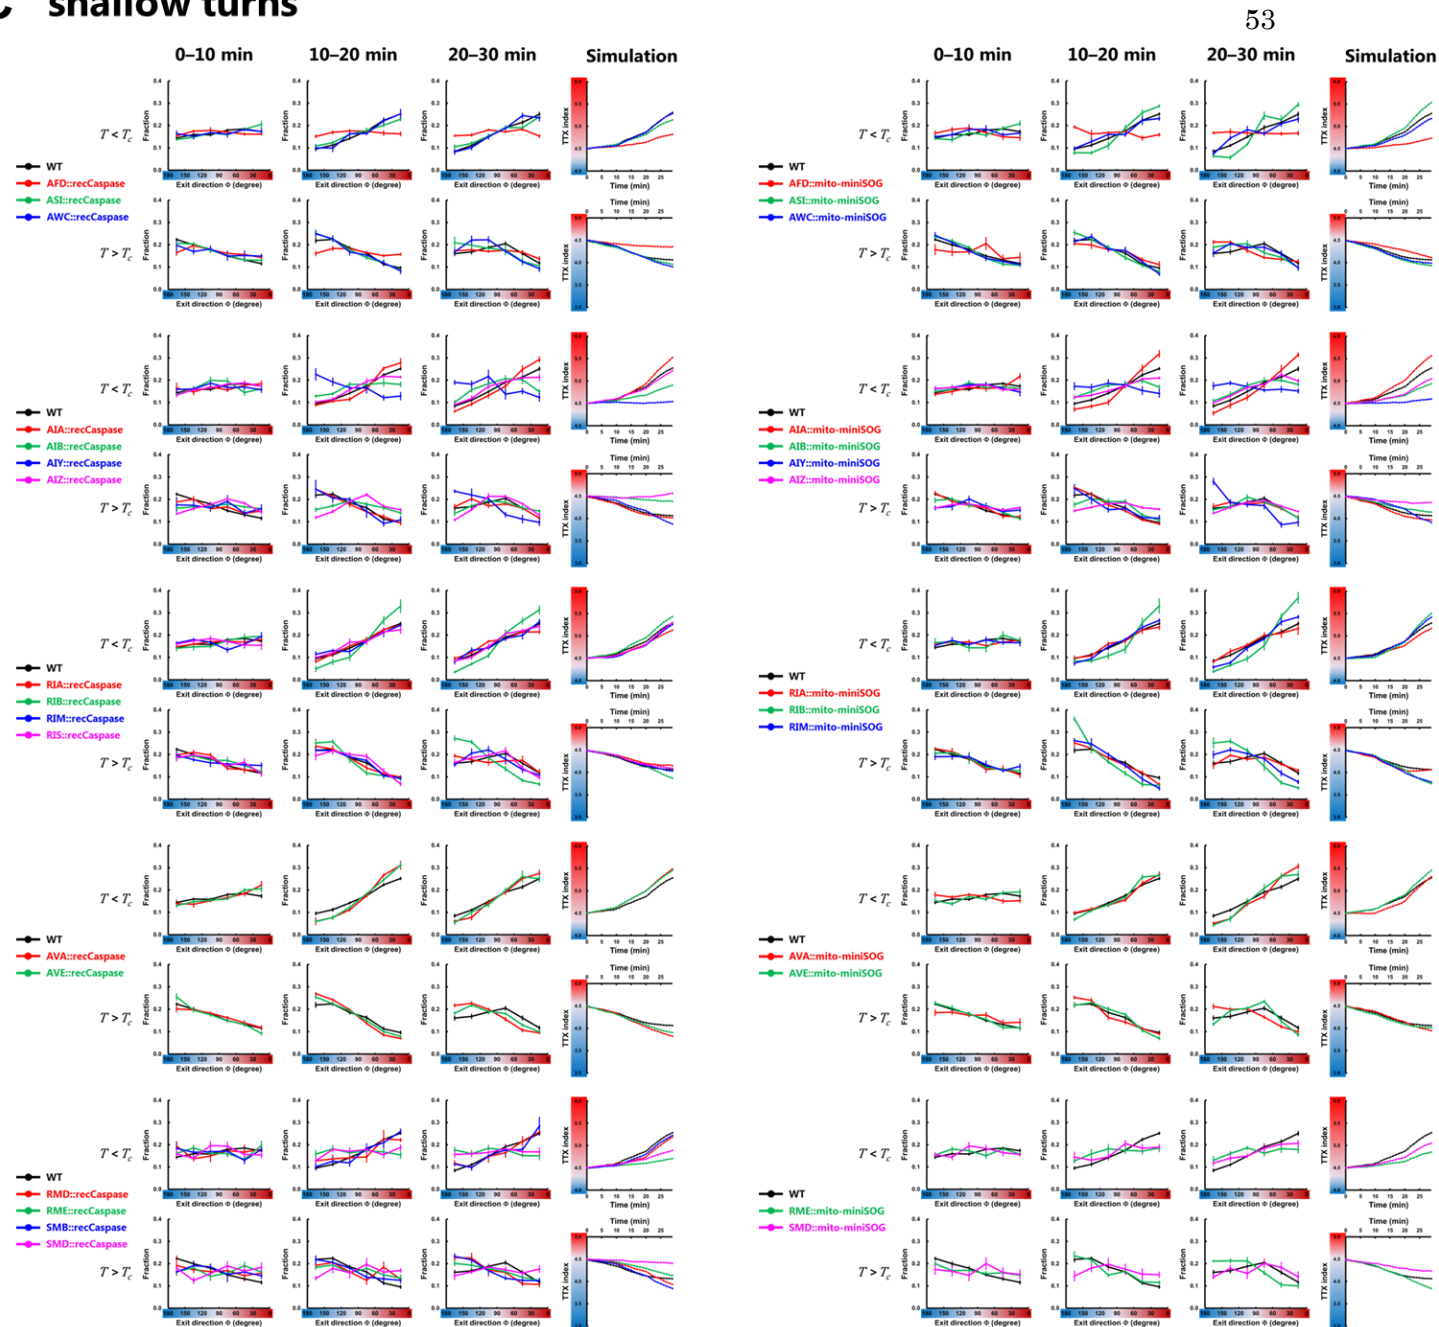

## D

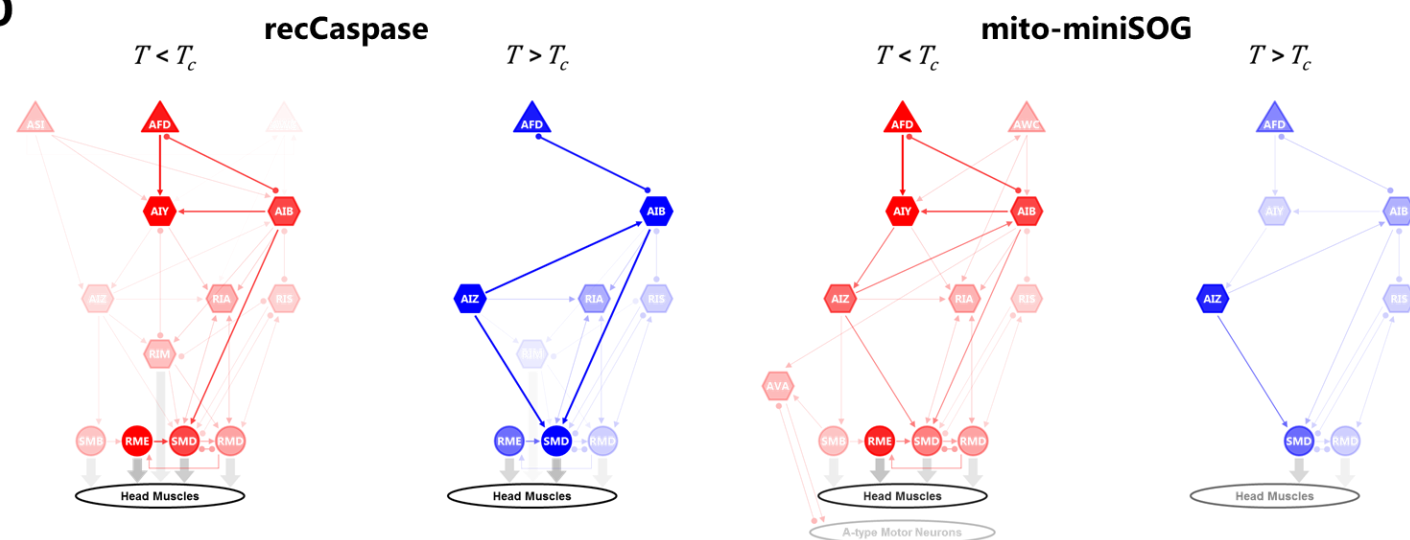

## E speeds

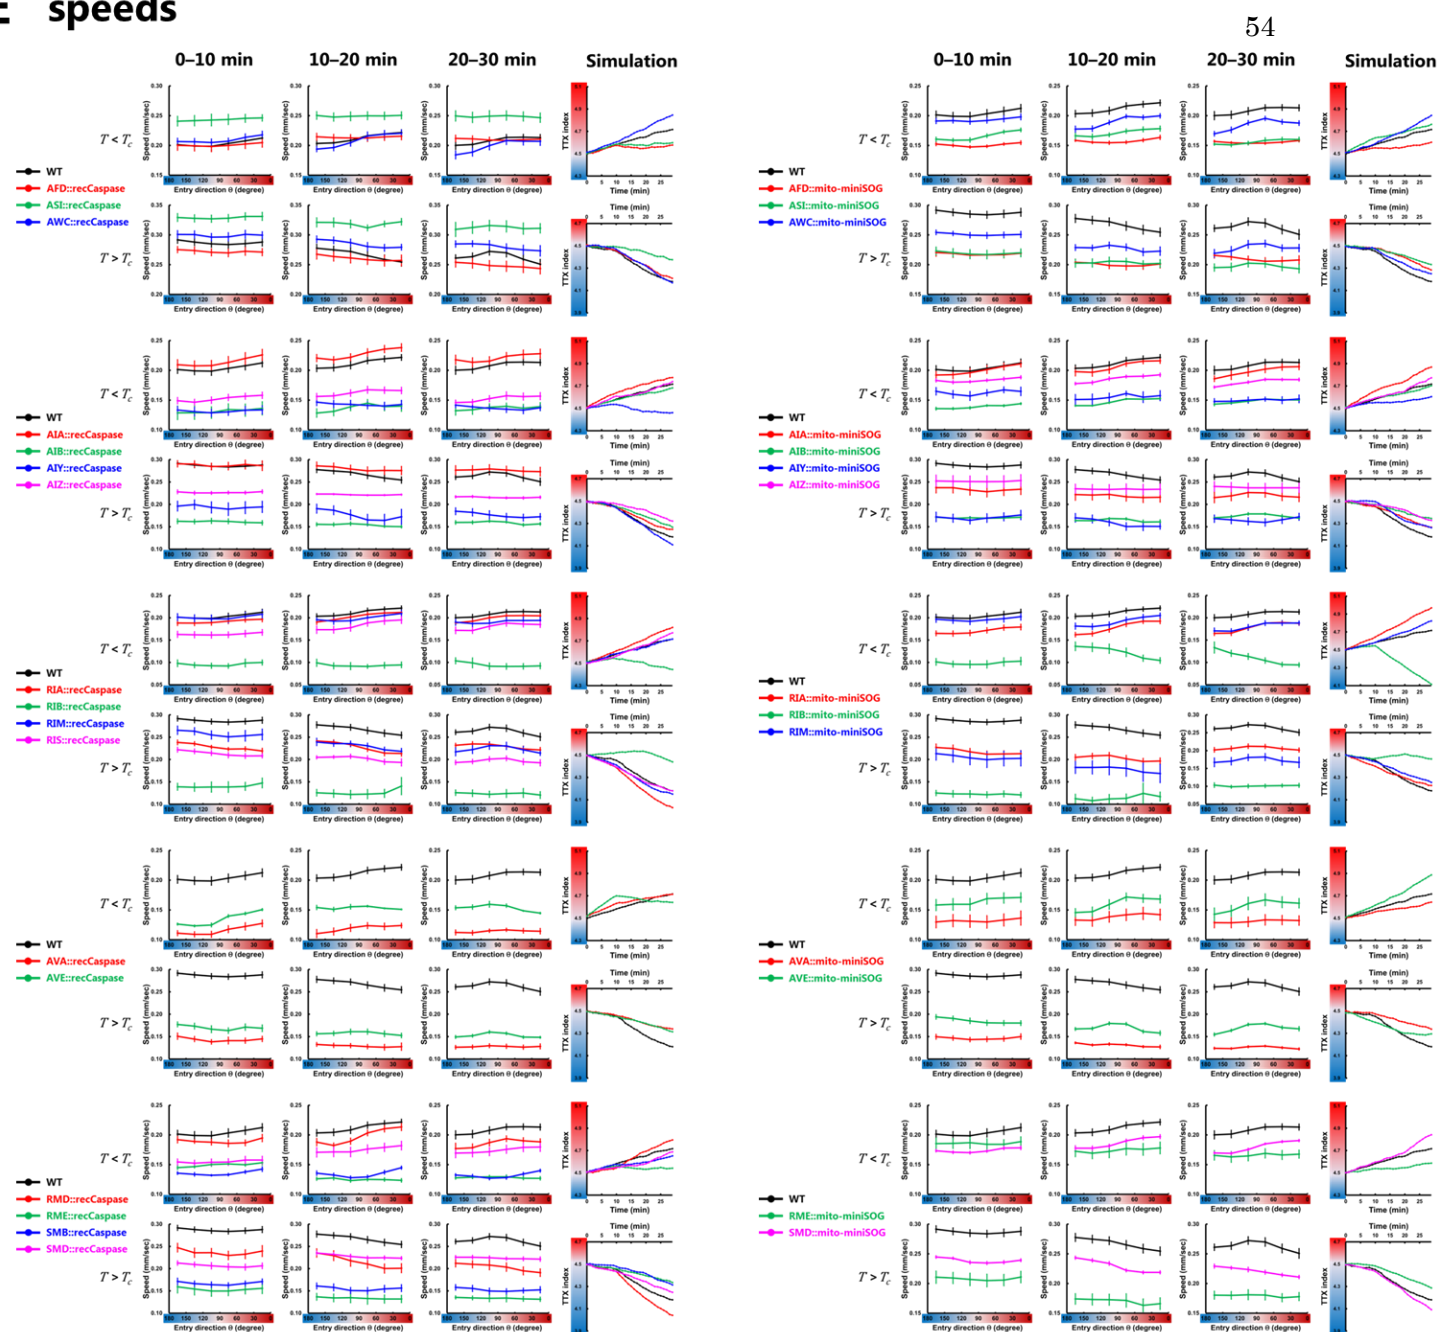

## F

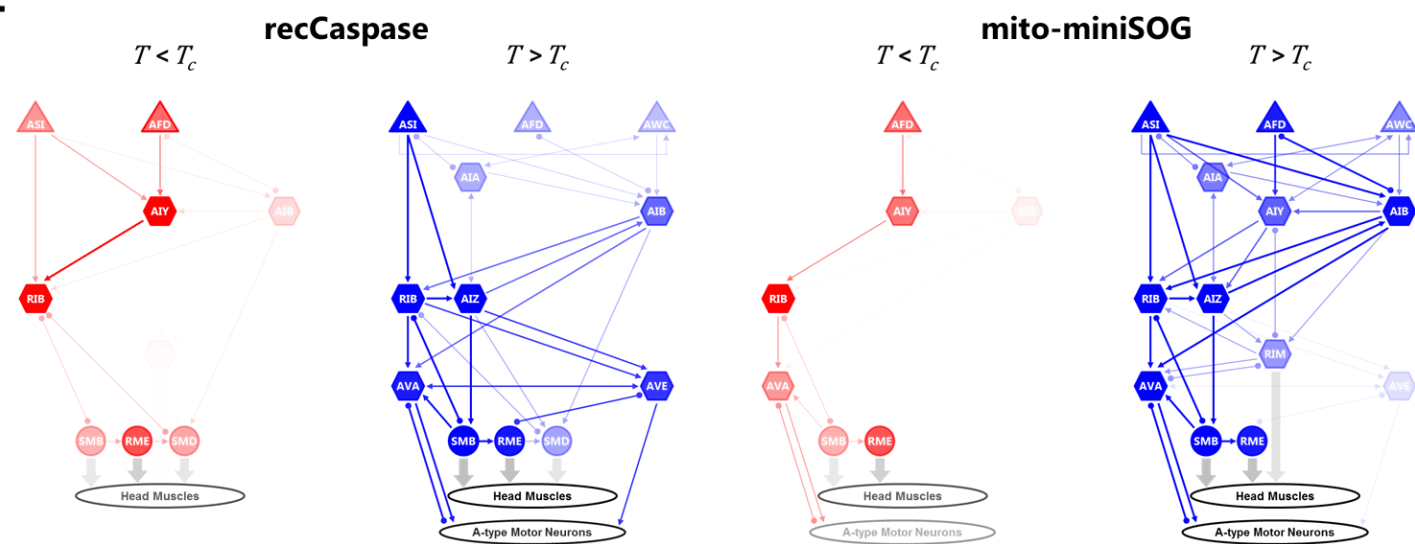

1090 **Figure S5.** Time course of the regulations of the behavioral components in cell-ablated  
1091 animals. **(A)** Plots of the biases  $\varphi$  of curves representing the averages as a function of  
1092 the entry direction  $\theta$  and the time course of TTX indices in the simulations. **(B)**  
1093 Predicted neural circuits for regulating the curves. **(C)** Fraction plots of the exit  
1094 direction  $\Phi$  after the shallow turns and the time course of TTX indices in the  
1095 simulations. **(D)** Predicted neural circuits for regulating the shallow turns. **(E)** Speed  
1096 plots and the time course of TTX indices in the simulations. **(F)** Predicted neural  
1097 circuits for regulating the speeds. In **(A, C, E)**, the averages over 0–10 min (first  
1098 columns), over 10–20 min (second columns), over 20–30 min (third columns), and the  
1099 time course of TTX indices in the simulations (fourth columns) are shown.  $n \geq 5$ . In **(B,**  
1100 **D, F)**, predicted neural circuits in the  $T < T_c$  condition (red) and in the  $T > T_c$  condition  
1101 (blue) are shown. The thickness and color strength of each neuron represent the  
1102 functional importance of the neuron predicted from the analysis and were determined as  
1103 follows: For each neuron, the differences between the migration index of the wild-type  
1104 animals and the index of the cell-ablated animals expressing reconstituted caspases (left  
1105 panels) or mito-miniSOG (right panels) were calculated. The difference is used to  
1106 determine the color strength, where the color strength of each neuron is proportional to  
1107 this value. The color strength of each line is identical to the strength of the color of one  
1108 of the two connected neurons with lower strength, and the thickness of each line is  
1109 proportional to this color strength. In RIS, SMB, and RMD neurons, we applied the data  
1110 of the animals expressing recCaspase on both panels because we could not obtain the  
1111 animals expressing mito-miniSOG specifically in these neurons.

## A reversal turns

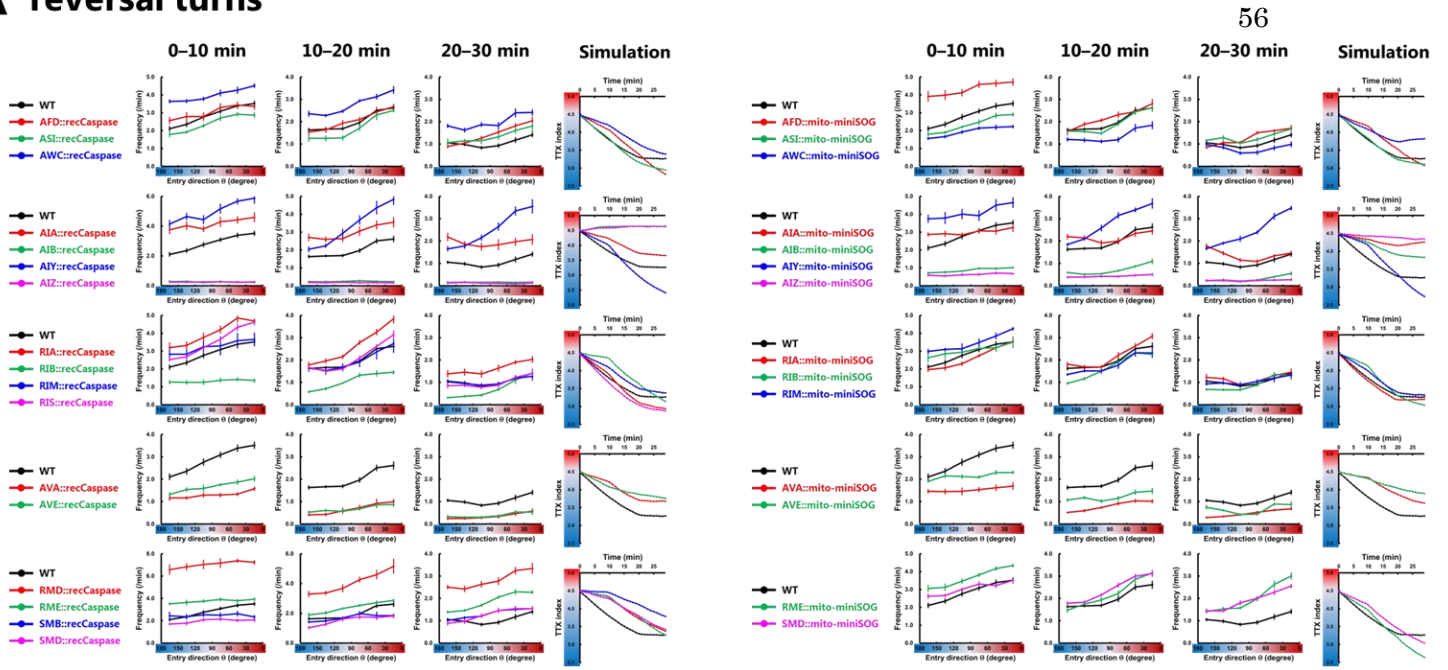

## B

recCaspase

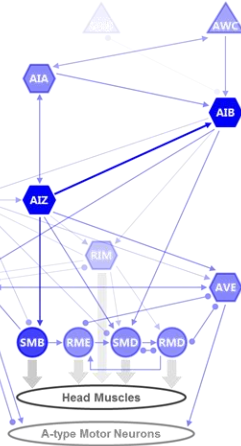

mito-miniSOG

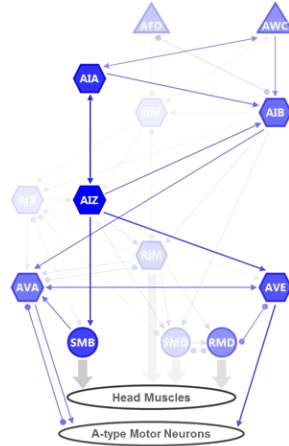

## C

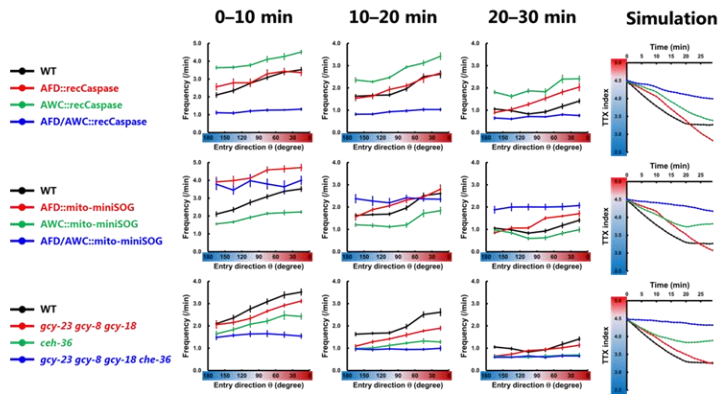

## D

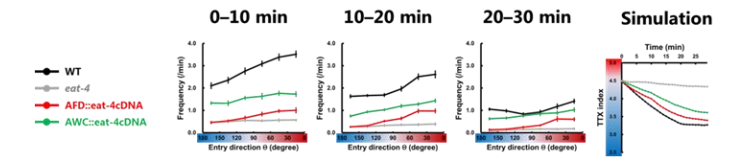



1113 **Figure S6.** The time course of the regulations of the reversal turns in cell-ablated  
1114 animals and cell-deficient mutants. **(A, C, D)** Plots of the reversal turn frequency  
1115 representing the averages as a function of the entry direction  $\theta$  and the time course of  
1116 TTX indices in the simulations. **(A)** Cell-ablated animals. **(C)** AFD-AWC double  
1117 ablated/deficient animals. **(D)** Glutamate transporter-deficient mutant *eat-4*, the mutant  
1118 expressing the wild-type form of an *eat-4* cDNA only in AFD, and the mutant  
1119 expressing an *eat-4* cDNA only in AWC. The averages over 0–10 min (first columns),  
1120 over 10–20 min (second columns), over 20–30 min (third columns), and the time course  
1121 of TTX indices in the simulations (fourth columns) are shown.  $n \geq 5$ . **(B)** Predicted  
1122 neural circuits for regulating the reversal turns. In RIS, SMB, and RMD neurons, we  
1123 applied the data of the animals expressing recCaspase on both panels because we could  
1124 not obtain the animals expressing mito-miniSOG specifically in these neurons.

## A omega turns

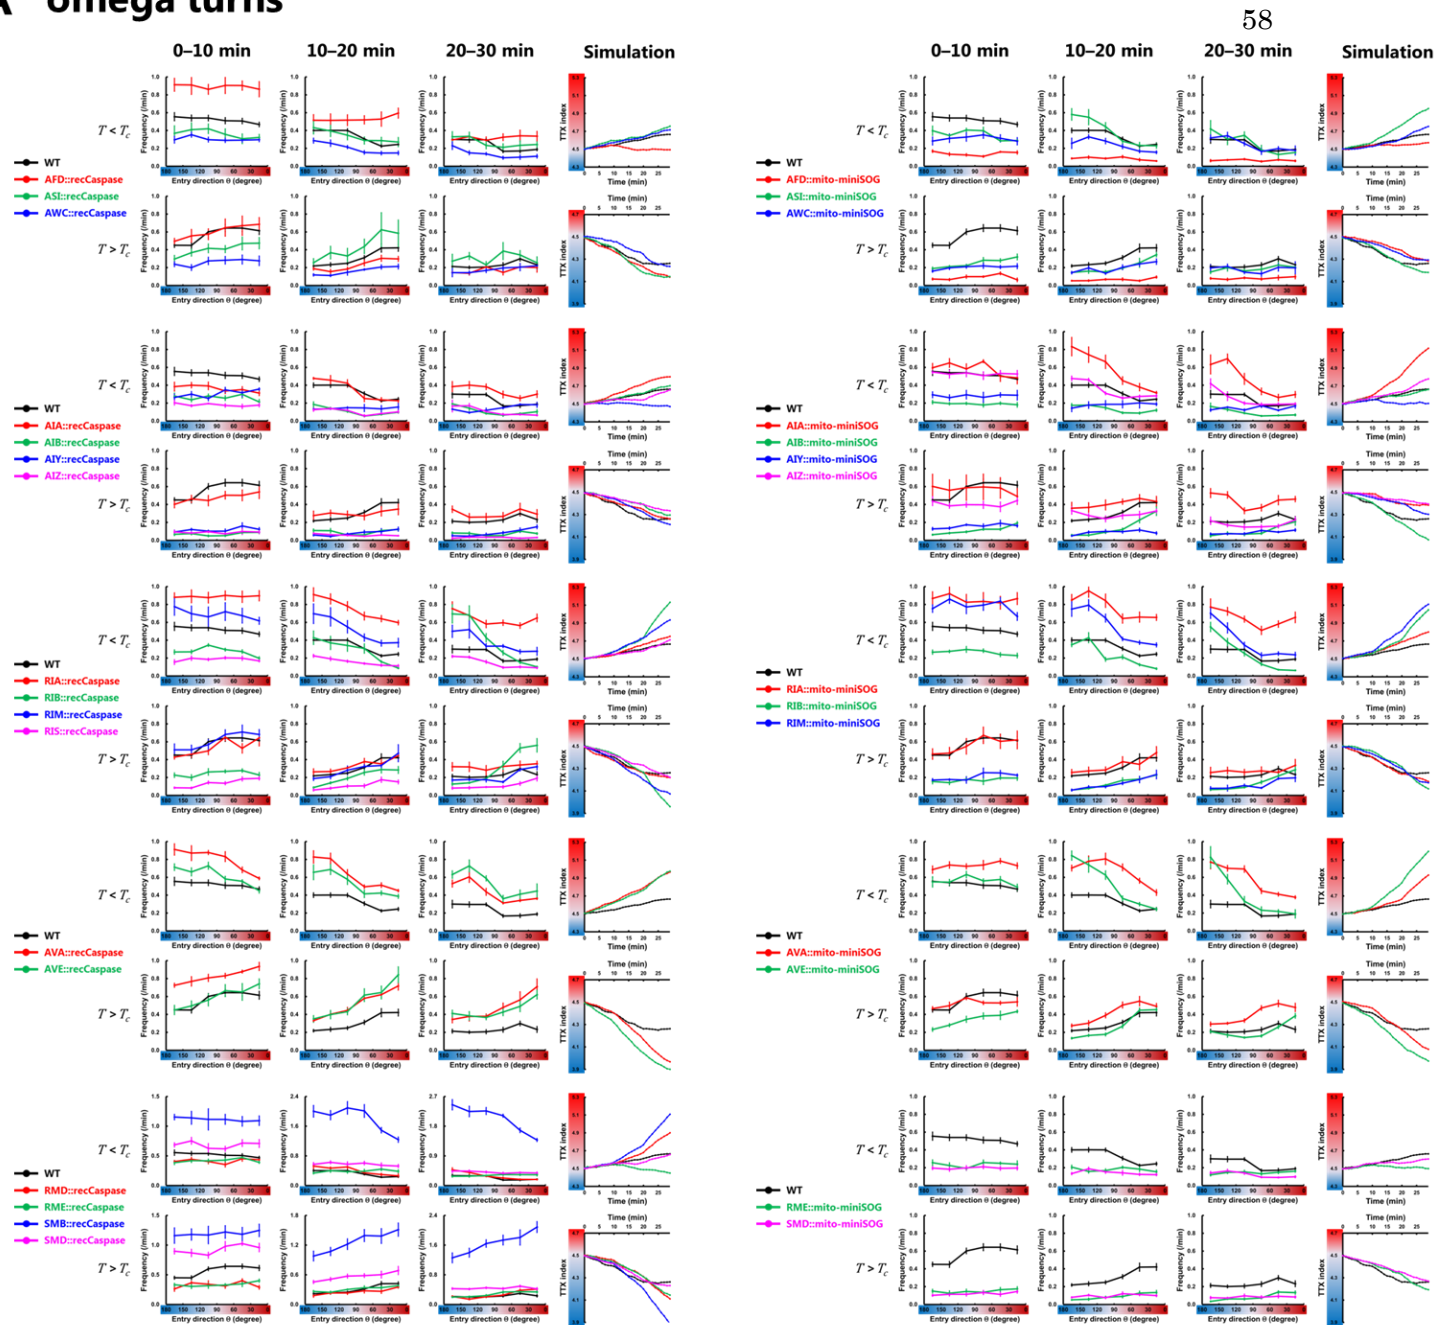

## B

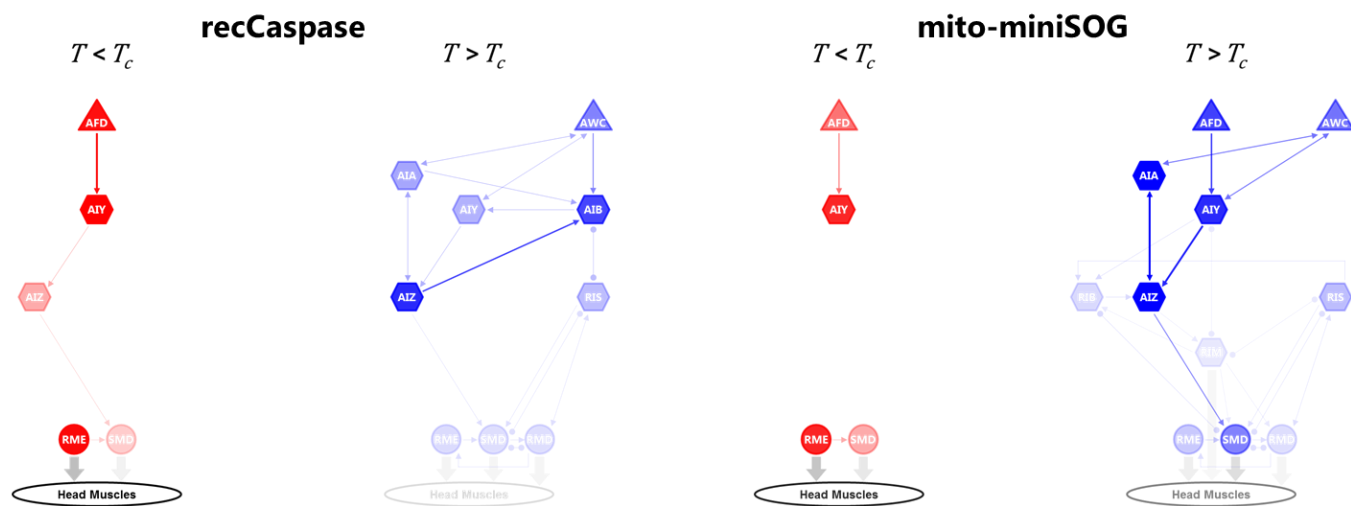

1126 **Figure S7.** The time course of the regulations of the omega turns in cell-ablated animals  
1127 and cell-deficient mutants. **(A)** Plots of the omega turn frequency representing the  
1128 averages as a function of the entry direction  $\theta$  and the time course of TTX indices in the  
1129 simulations. The averages over 0–10 min (first columns), over 10–20 min (second  
1130 columns), over 20–30 min (third column), and the time course of TTX indices in the  
1131 simulations (fourth columns) are shown.  $n \geq 5$ . **(B)** Predicted neural circuits for  
1132 regulating the omega turns in the  $T < T_c$  condition (red) and in the  $T > T_c$  condition (blue).  
1133 In RIS, SMB, and RMD neurons, we applied the data of the animals expressing  
1134 recCaspase on both panels because we could not obtain the animals expressing  
1135 mito-miniSOG specifically in these neurons.

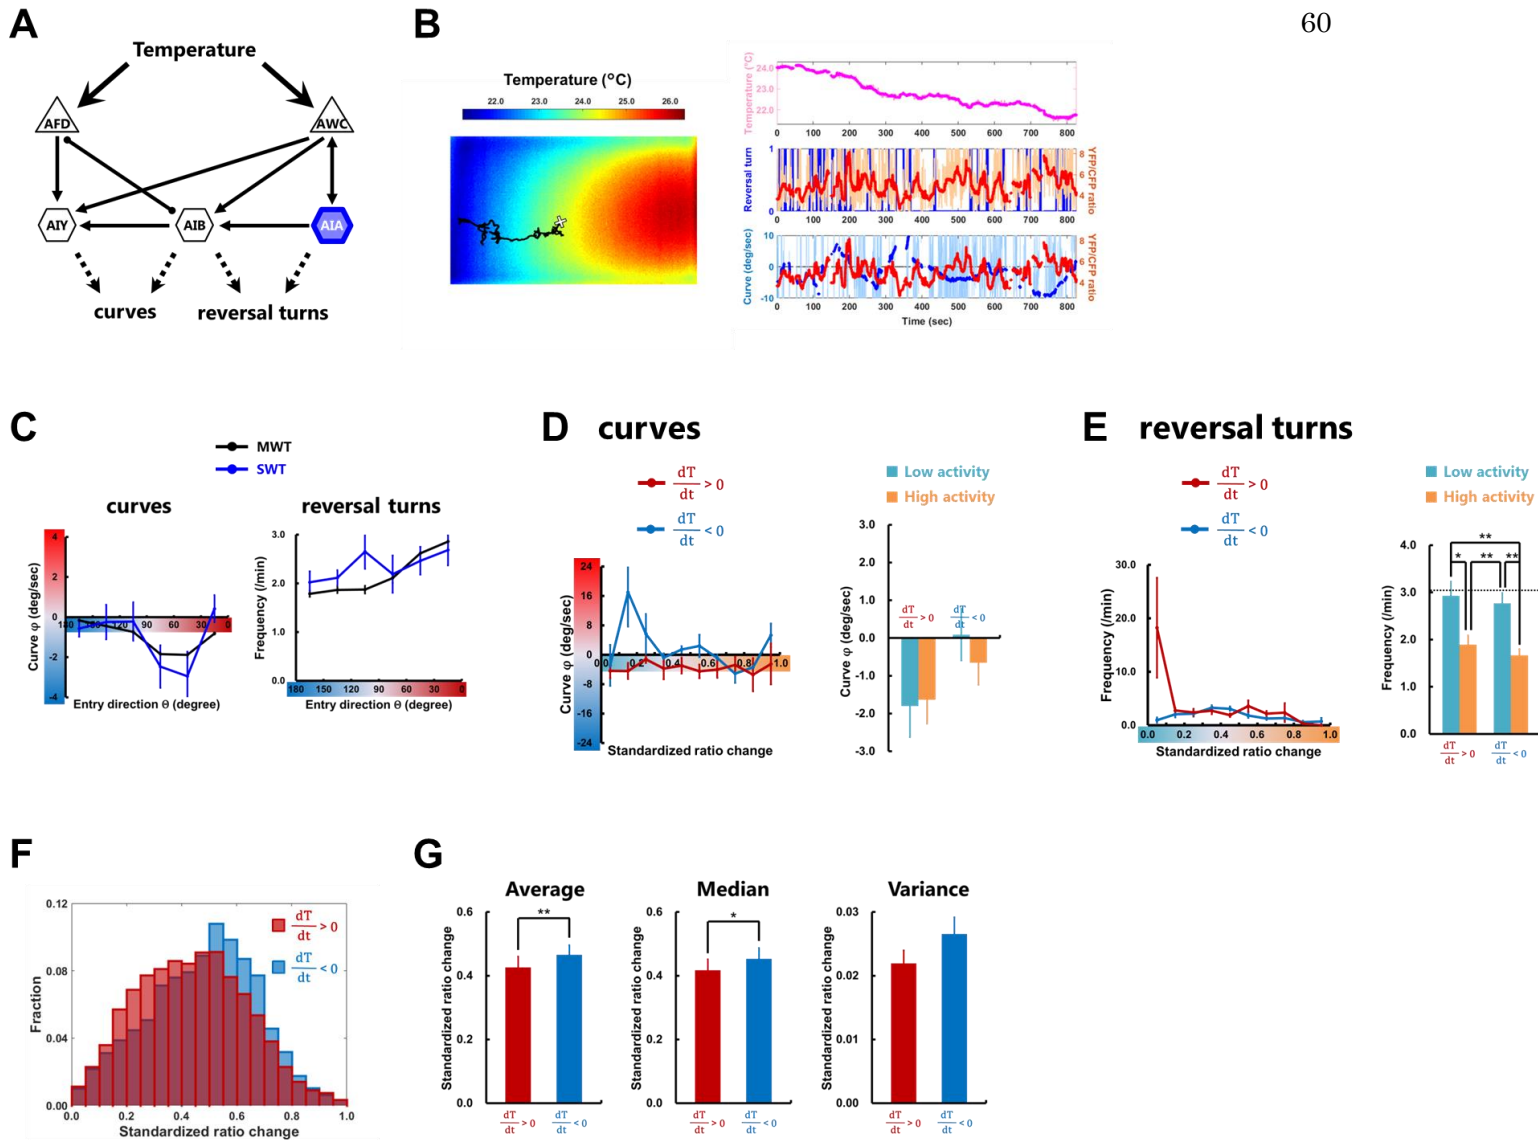

1136

1137 **Figure S8.** AIA neuron regulates the reversal turns regardless of context. (A)  
 1138 Representative sensory neurons and first-layer interneurons, which regulate the reversal  
 1139 turns or the curves. Thin arrows indicate chemical synapses and an undirected line with  
 1140 round endings indicates gap junction. (B) Representative thermography image (left  
 1141 panel) taken together with calibrating temperature measurements using a thermocouple  
 1142 sensor. Projection of a trajectory (black line) shows how the animal searches the thermal  
 1143 environment. The white + marks the starting point when recording starts. From this  
 1144 trajectory, the time course of the temperature changes is obtained (light magenta line in  
 1145 right upper panel), and the reversal turn (blue line in right middle panel) and the curve  
 1146 (light blue line in right lower panel) are extracted. The temperature after the median  
 1147 filter (magenta line in right upper panel) and the averaged curve (blue line in right lower

1148 panel) are also shown. The time course of the YFP/CFP ratio of the AIA neuron (light  
1149 red line in right middle panel) was calculated from YFP and CFP fluorescences, and the  
1150 ratio after the median filter is also shown (red line in right middle and lower panel). (C)  
1151 Plots of the biases of curves (left panel) and the reversal turn frequency (right panel)  
1152 representing the averages as a function of the entry direction  $\theta$ . The data obtained on the  
1153 multi-worm tracker (black lines,  $n \geq 12$ ) and on the single-worm tracker (colored lines,  
1154  $n \geq 14$ ) are shown. (D and E) Plots of the biases of curves (D) and the reversal turn  
1155 frequency (E) representing the averages as a function of the standardized ratio change  
1156 (see Materials and methods) of AIA (upper panels). Standardized ratio change was  
1157 divided into “High activity” or “Low activity” according to the median value (Figure  
1158 S8G), and the curving bias and the reversal turn frequency were averaged within High  
1159 (orange columns in lower panels) or Low (cyan columns in lower panels) activity while  
1160 the animals are moving up or down the thermal gradient. Dashed line in right lower  
1161 panel shows the average of the reversal turn frequency on the constant temperature at  
1162 23°C obtained in MWT. (F) Fractional histogram showing the standardized ratio change  
1163 of AIA while the animals are moving up the thermal gradient (deep red) and those while  
1164 moving down the thermal gradient (deep blue). (G) Comparison of the average (left  
1165 panel), the median (middle panel), and the variance (right panel) of the standardized  
1166 ratio change of AIA between while the animals are moving up the thermal gradient  
1167 (deep red columns) and those while moving down the thermal gradient (deep blue  
1168 columns).  $n \geq 15$ . Error bars indicate SEM. Pairwise test for multiple comparisons using  
1169 Holm’s method (D); Friedman rank sum test together with repetitive Wilcoxon signed  
1170 rank tests (E); paired Student’s *t*-test (G). \*\* $p < 0.01$ , \* $p < 0.05$ .

| Strain name | Genotype                                                                                                 | Experiment       | Ablation Efficiency (%) |
|-------------|----------------------------------------------------------------------------------------------------------|------------------|-------------------------|
| IK2809      | <i>njls80[gcy-8p::cz::caspase-3(p17), gcy-8p::caspase-3(p12)::nz, ges-1p::nls-GFP] (X)</i>               | AFD ablation     | 100                     |
| IK3048      | <i>njls89[gcy-8p::tommm-20(N<sup>-55AA</sup>)::miniSOG, ges-1p::nls-GFP] (III)</i>                       |                  | 92.7                    |
| PY7505      | <i>oyls84[gcy-27p::cz::caspase-3(p17), gpa-4p::caspase-3(p12)::nz, gcy-27p::GFP, unc-122p::dsRed]</i>    | ASI ablation     | (Beverly et al., 2011)  |
| IK3176      | <i>njls104[gcy-27p::flp, gpa-4p::frr::tommm-20(N<sup>-55AA</sup>)::miniSOG, ges-1p::nls-GFP] (IV)</i>    |                  | 91.9                    |
| IK2808      | <i>njls79[ceh-36p::cz::caspase-3(p17), ceh-36p::caspase-3(p12)::nz, ges-1p::nls-GFP] (X)</i>             | AWC ablation     | 98.4                    |
| IK3125      | <i>njls98[ceh-36p::tommm-20(N<sup>-55AA</sup>)::miniSOG, ges-1p::nls-GFP] (I)</i>                        |                  | 100                     |
| IK3263      | <i>njls120[ins-1p::cz::caspase-3(p17), gcy-28dp::caspase-3(p12)::nz, ges-1p::nls-GFP] (V)</i>            | AIA ablation     | 64.6                    |
| IK3240      | <i>njls115[ins-1p::flp, gcy-28dp::frr::tommm-20(N<sup>-55AA</sup>)::miniSOG, ges-1p::nls-GFP] (IV)</i>   |                  | 74.1                    |
| IK3066      | <i>njls92[inx-1p::cz::caspase-3(p17), odr-2(2b)p::caspase-3(p12)::nz, ges-1p::nls-GFP] (II)</i>          | AIB ablation     | 100                     |
| IK3388      | <i>njls131[odr-2(2b)p::flp, inx-1p::frr::tommm-20(N<sup>-55AA</sup>)::miniSOG, ges-1p::nls-GFP] (X)</i>  |                  | 100                     |
| IK2710      | <i>njls62[AIYp::cz::caspase-3(p17), AIYp::caspase-3(p12)::nz, ges-1p::nls-GFP] (V)</i>                   | AIY ablation     | 100                     |
| IK2962      | <i>njls87[AIYp::tommm-20(N<sup>-55AA</sup>)::miniSOG, ges-1p::nls-GFP] (IV)</i>                          |                  | 100                     |
| IK3179      | <i>njls107[acc-2p::cz::caspase-3(p17), odr-2(2b)p::caspase-3(p12)::nz, ges-1p::nls-GFP] (IV)</i>         | AIZ ablation     | 100                     |
| IK3241      | <i>njls116[acc-2p::flp, odr-2(2b)p::frr::tommm-20(N<sup>-55AA</sup>)::miniSOG, ges-1p::nls-GFP] (IV)</i> |                  | 99.7                    |
| IK2910      | <i>njls84[glr-3p::cz::caspase-3(p17), glr-3p::caspase-3(p12)::nz, ges-1p::nls-GFP] (III)</i>             | RIA ablation     | 100                     |
| IK3289      | <i>njls123[glr-3p::tommm-20(N<sup>-55AA</sup>)::miniSOG, ges-1p::nls-GFP] (V)</i>                        |                  | 100                     |
| IK3049      | <i>njls90[trp-1p::cz::caspase-3(p17), sto-3p::caspase-3(p12)::nz, ges-1p::nls-GFP] (I)</i>               | RIB ablation     | 96.6                    |
| IK3238      | <i>njls113[ser-4p::flp, sto-3p::frr::tommm-20(N<sup>-55AA</sup>)::miniSOG, ges-1p::nls-GFP] (III)</i>    |                  | 95.5                    |
| IK3067      | <i>njls93[glr-1p::cz::caspase-3(p17), tdc-1p::caspase-3(p12)::nz, ges-1p::nls-GFP] (X)</i>               | RIM ablation     | 66.7*                   |
| IK3144      | <i>njls100[glr-1p::flp, tdc-1p::frr::tommm-20(N<sup>-55AA</sup>)::miniSOG, ges-1p::nls-GFP] (III)</i>    |                  | 92.9                    |
| IK3325      | <i>njls126[nlr-1p::cz::caspase-3(p17), ggr-2p::caspase-3(p12)::nz, ges-1p::nls-GFP] (V)</i>              | RIS ablation     | 98.5                    |
| IK3175      | <i>njls103[nmr-1p::cz::caspase-3(p17), flp-18p::caspase-3(p12)::nz, ges-1p::nls-GFP] (II)</i>            | AVA ablation     | 100                     |
| IK3327      | <i>njls128[flp-18p::flp, nmr-1p::frr::tommm-20(N<sup>-55AA</sup>)::miniSOG, ges-1p::nls-GFP] (II)</i>    |                  | 82.7                    |
| IK3177      | <i>njls105[nmr-1p::cz::caspase-3(p17), opt-3p::caspase-3(p12)::nz, ges-1p::nls-GFP] (X)</i>              | AVE ablation     | 97.8                    |
| IK3324      | <i>njls125[opt-3p::flp, nmr-1p::frr::tommm-20(N<sup>-55AA</sup>)::miniSOG, ges-1p::nls-GFP] (X)</i>      |                  | 100                     |
| IK3178      | <i>njls106[odr-2(18)p::cz::caspase-3(p17), nep-2p::caspase-3(p12)::nz, ges-1p::nls-GFP] (III)</i>        | SMBD/V ablation  | 53.3                    |
| IK3326      | <i>njls127[flp-22p::cz::caspase-3(p17), lgc-55p::caspase-3(p12)::nz, ges-1p::nls-GFP] (V)</i>            | SMDD/V ablation  | 75.2                    |
| IK3376      | <i>njls129[lgc-55p::flp, flp-22p::frr::tommm-20(N<sup>-55AA</sup>)::miniSOG, ges-1p::nls-GFP] (I)</i>    |                  | 95.9                    |
| IK3237      | <i>njls121[glr-1p::cz::caspase-3(p17), mgl-1p::caspase-3(p12)::nz, ges-1p::nls-GFP] (II)</i>             | RMD/D/V ablation | 34.8                    |
| IK3404      | <i>njls132[ser-2(2)p::cz::caspase-3(p17), ntr-2p::caspase-3(p12)::nz, ges-1p::nls-GFP] (X)</i>           | RMED/V ablation  | 56.9                    |
| IK3377      | <i>njls130[ser-2(2)p::flp, ntr-2p::frr::tommm-20(N<sup>-55AA</sup>)::miniSOG, ges-1p::nls-GFP] (X)</i>   |                  | 95.5                    |
| IK3242      | <i>njls117[gcy-8p::cz::caspase-3(p17), gcy-8p::caspase-3(p12)::nz, ges-1p::nls-GFP] (I); njls79</i>      | AFD/AWC ablation | -                       |
| IK3227      | <i>njls98; njls89</i>                                                                                    |                  | -                       |

1172 **Table S1.** Cell-ablated strains used in this study. Efficiencies of cell-ablations by  
1173 recCaspases were estimated by crossing the listed lines into integrated reporter lines  
1174 listed in Table S2 and checking the disappearance of fluorescence from the reporter  
1175 proteins. \*Efficiency of *njIs93* was estimated in the heterozygous state. Efficiencies of  
1176 cell-ablations by mito-miniSOG were estimated by checking the disappearance of  
1177 fluorescence from the miniSOG after the illumination of blue light at the L1 stage.

| Strain name | Genotype                                                        | Experiment                            |
|-------------|-----------------------------------------------------------------|---------------------------------------|
| IK0673      | <i>njls2[nhr-38p::GFP, AIYp::GFP] (V)</i>                       | AFD/AIY marker                        |
| IK2952      | <i>njls86[sra-6p::GFP] (X)</i>                                  | ASI marker                            |
| IK2811      | <i>njls82[ceh-36p::GFP, glr-3p::GFP] (I)</i>                    | AWC/RIA marker                        |
| IK3237      | <i>njls112[gcy-28dp::GFP] (X)</i>                               | AIA marker                            |
| IK2711      | <i>njls63[odr-2(2b3a)p::GFP] (I)</i>                            | AIB marker                            |
| IK2672      | <i>njls39[acc2-p::TagRFP] (I)</i>                               | AIZ marker                            |
| IK2951      | <i>njls85[sto-3p::GFP] (X)</i>                                  | RIB marker                            |
| IK2881      | <i>njls83[tdc-1p::GFP] (X)</i>                                  | RIM marker                            |
| IK3239      | <i>njls114[unc-47p::flp, ser-4p::frr::TagRFP] (IV)</i>          | RIS marker                            |
| IK3246      | <i>njls119[npr-4ap::GFP] (V)</i>                                | AVA marker                            |
| ST401       | <i>ncls401[opt-3p::ArchT::GFP, acd-4p::GFP]</i>                 | AVE marker                            |
| IK3148      | <i>njls102[odr-2(18)p::GFP] (IV)</i>                            | SMBD/V marker                         |
| IK3147      | <i>njls101[[ad-2p::flp, flp-22p::frr::TagRFP] (III)</i>         | SMDD/V marker                         |
| IK3087      | <i>njls94[rig-5ap::GFP] (V)</i>                                 | RMD/D/V marker                        |
| IK3047      | <i>njls88[unc-47p::GFP] (II)</i>                                | RMED/V marker                         |
| IK0597      | <i>gcy-23(nj37) gcy-8(oy44) gcy-18(nj38)</i>                    | AFD disruption                        |
| IK2572      | <i>ceh-36(ky640)</i>                                            | AWC disruption                        |
| IK2613      | <i>gcy-23(nj37) gcy-8(oy44) gcy-18(nj38); ceh-36(ky640)</i>     | AFD/AWC disruption                    |
| IK0604      | <i>eat-4(ky5)</i>                                               | glutamatergic transmission disruption |
| IK0884      | <i>eat-4(ky5); njEx379[gcy-8p::eat-4 cDNA, ges-1p::nls-GFP]</i> | rescue of <i>eat-4</i> in AFD         |
| IK0885      | <i>eat-4(ky5); njEx380[odr-3p::eat-4 cDNA, ges-1p::nls-GFP]</i> | rescue of <i>eat-4</i> in AWC         |
| IK3331      | <i>njEx1387[ins-1p::flp, gcy-28dp::frr::YCX1.6]</i>             | AIA imaging                           |
| IK3330      | <i>njEx1386[apff-1p::flp, inx-1p::frr::YCX1.6]</i>              | AIB imaging                           |

1178

1179 **Table S2.** Strains carrying cell markers, mutations, or calcium indicators used in this  
 1180 study.



1181 **Supplemental Movie Legends**

1182 **Movie S1.** Thermotaxis behavior is accomplished within 30 minutes. Each dot  
1183 represents the centroid of the animal during the thermotaxis assays in the  $T < T_c$   
1184 condition (left panel) and in the  $T > T_c$  condition (center panel). The time course of TTX  
1185 indices in the  $T < T_c$  condition (red line) and in the  $T > T_c$  condition (blue line) are shown  
1186 in the right panel.

1187

1188 **Movie S2.** Thermotaxis simulation reproduces the population behavior in the assays.  
1189 Each dot represents the centroid of the animal during the thermotaxis assays in the  $T < T_c$   
1190 condition (left upper panel) and in the  $T > T_c$  condition (left lower panel). The animals in  
1191 the thermotaxis simulation are shown in the center column. The time courses of TTX  
1192 indices in the experiments (colored lines) and in the simulations (black lines) are shown  
1193 in the right column.
